# Supplementary material for: Unusual 1,2-aryl migration in Pd(ii)-catalyzed aza-Wacker-type cyclization of 2-alkenylanilines
Source: Royal Society of Chemistry journal article supplement (doi:10.1039/c5ob00361j), 2015-01-01

## Supporting Information

### Unusual 1,2-Aryl Migration in Pd(II)-Catalyzed Aza-Wacker-Type Cyclization of 2-Alkenylanilines

So Won Youn\* and So Ra Lee

*Center for New Directions in Organic Synthesis, Department of Chemistry and  
Research Institute for Natural Sciences, Hanyang University, Seoul 133-791, Korea.*

#### Table of Contents

|                                                                                                                             |     |
|-----------------------------------------------------------------------------------------------------------------------------|-----|
| 1. General Information .....                                                                                                | S2  |
| 2. Table S1. Full Data of Optimization Studies .....                                                                        | S3  |
| 3. Table S2. Effect of <i>N</i> -Protecting Groups .....                                                                    | S4  |
| 4. Table S3. Substrate Scope: $\beta$ -Monosubstituted Alkenes .....                                                        | S5  |
| 5. Table S4. Substrate Scope: $\beta,\beta$ -Disubstituted Alkenes .....                                                    | S6  |
| 6. General Procedure for the Preparation of <i>N</i> -Ts-2-Alkenylanilines .....                                            | S7  |
| 7. General Procedure for the Preparation of $\beta,\beta$ -Disubstituted 2-Alkenylanilines .....                            | S7  |
| 8. General Procedure for the Pd(II)-Catalyzed Aza-Wacker-Type Cyclization of <i>N</i> -Ts-2-Alkenylanilines 1 .....         | S9  |
| 9. General Procedure for the Preparation of 2,3-Disubstituted <i>N</i> -Ts-Indoles 3 & 3' .....                             | S20 |
| 10. Mechanistic Studies .....                                                                                               | S24 |
| 11. Proposed Mechanism for the Cu(II)-Mediated Reaction in the Absence of Pd(II) Catalyst (Entries 23-24 in Table S1) ..... | S27 |
| 12. Copies of NMR Spectra .....                                                                                             | S28 |

## General Information

Nuclear Magnetic Resonance spectra were recorded on 300 or 400 MHz instruments. Spectra were recorded in CDCl<sub>3</sub> solution referenced to TMS or solvent residual peak. High Resolution Mass Spectra were measured using EI at 70 eV. GC-MS spectra were recorded with EI ionization and an Elite-1 column (0.25 mm x 30 m, Film: 0.25 μm). For control of the conversion and characterization of the products, the following method was used: The method starts with the injection temperature T<sub>0</sub> (50 °C), after holding this temperature for 5 min, the column is heated to the temperature T<sub>1</sub> (ramp, 300 °C, 10 °C/min) and hold for additional 10 min. Flash chromatography was performed on silica gel 230-400 mesh. All catalysts were purchased from Sigma-Aldrich or Strem and used as received. Unless otherwise noted, all commercially obtained reagents and solvents were used as received. Anhydrous DMF, toluene, ClCH<sub>2</sub>CH<sub>2</sub>Cl, and dioxane were purchased from Sigma-Aldrich in a SureSeal™ bottle and used as received. THF was distilled from sodium benzophenone ketyl immediately prior to use. Heptane and MeCN were distilled from CaH<sub>2</sub> immediately prior to use. Thin layer chromatograms (TLC) was visualized via UV. Preparation and spectral data of **1a-1e**, **1g-1k**, and **1n-1p** are available in our previous report.<sup>1</sup>

---

<sup>1</sup> (a) Jang, Y. H.; Youn, S. W. *Org. Lett.* **2014**, *16*, 3720. (b) Youn, S. W.; Ko, T. Y.; Jang, M. J.; Jang, S. S. *Adv. Synth. Catal.* **2015**, *357*, 227.

**Table S1. Full Data of Optimization Studies**
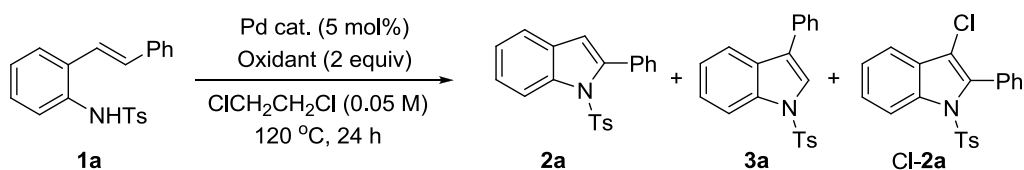

| Entry                 | Pd cat.                                             | Oxidant                                      | Additive (mol%)                    | Yield (%) <sup>a</sup> | <b>2a:3a:Cl-2a</b> <sup>b</sup> |
|-----------------------|-----------------------------------------------------|----------------------------------------------|------------------------------------|------------------------|---------------------------------|
| 1                     | Pd(O <sub>2</sub> CCF <sub>3</sub> ) <sub>2</sub>   | Cu(OAc) <sub>2</sub>                         | -                                  | 20                     | 1:0:0                           |
| 2                     | Pd(O <sub>2</sub> CCF <sub>3</sub> ) <sub>2</sub>   | CuCl <sub>2</sub>                            | -                                  | (84)                   | 1:0.5:0                         |
| 3                     | Pd(O <sub>2</sub> CCF <sub>3</sub> ) <sub>2</sub>   | CuBr <sub>2</sub>                            | -                                  | 36                     | 1:0:0                           |
| 4                     | Pd(O <sub>2</sub> CCF <sub>3</sub> ) <sub>2</sub>   | Ag <sub>2</sub> O                            | -                                  | 32                     | 1:0:0                           |
| 5                     | Pd(O <sub>2</sub> CCF <sub>3</sub> ) <sub>2</sub>   | AgOAc                                        | -                                  | 81                     | 1:0:0                           |
| 6                     | Pd(O <sub>2</sub> CCF <sub>3</sub> ) <sub>2</sub>   | Ag <sub>2</sub> CO <sub>3</sub>              | -                                  | 87                     | 1:0.3:0                         |
| 7                     | Pd(O <sub>2</sub> CCF <sub>3</sub> ) <sub>2</sub>   | BQ or CuCl                                   | -                                  | 0                      | -                               |
| 8                     | Pd(O <sub>2</sub> CCF <sub>3</sub> ) <sub>2</sub>   | <i>t</i> BuOOH                               | -                                  | 34                     | 1:0:0                           |
| 9                     | Pd(O <sub>2</sub> CCF <sub>3</sub> ) <sub>2</sub>   | Ce(SO <sub>4</sub> ) <sub>2</sub>            | -                                  | 48                     | 1:0.1:0                         |
| 10                    | Pd(O <sub>2</sub> CCF <sub>3</sub> ) <sub>2</sub>   | PhI(OAc) <sub>2</sub>                        | -                                  | 12                     | 1:0:trace <sup>c</sup>          |
| 11                    | Pd(O <sub>2</sub> CCF <sub>3</sub> ) <sub>2</sub>   | K <sub>2</sub> S <sub>2</sub> O <sub>8</sub> | -                                  | 34                     | 1:0:0                           |
| 12                    | Pd(O <sub>2</sub> CCF <sub>3</sub> ) <sub>2</sub>   | Oxone                                        | -                                  | 31                     | 1:0:0                           |
| 13                    | Pd(O <sub>2</sub> CCF <sub>3</sub> ) <sub>2</sub>   | selectfluor                                  | -                                  | 6                      | 1:0.2:0                         |
| 14 <sup>d</sup>       | Pd(O <sub>2</sub> CCF <sub>3</sub> ) <sub>2</sub>   | CuCl <sub>2</sub>                            | -                                  | 40                     | 1:0.2:0                         |
| 15 <sup>e</sup>       | Pd(O <sub>2</sub> CCF <sub>3</sub> ) <sub>2</sub>   | CuCl <sub>2</sub>                            | -                                  | 56                     | 1:0.3:0.2                       |
| 16 <sup>f</sup>       | Pd(O <sub>2</sub> CCF <sub>3</sub> ) <sub>2</sub>   | CuCl <sub>2</sub>                            | -                                  | 16-33                  | 1:0:0                           |
| 17 <sup>g</sup>       | Pd(O <sub>2</sub> CCF <sub>3</sub> ) <sub>2</sub>   | CuCl <sub>2</sub>                            | -                                  | 67-74                  | 1:0:0                           |
| 18 <sup>h</sup>       | Pd(O <sub>2</sub> CCF <sub>3</sub> ) <sub>2</sub>   | CuCl <sub>2</sub>                            | -                                  | 24                     | 1:0.3:0                         |
| <b>19<sup>i</sup></b> | <b>Pd(O<sub>2</sub>CCF<sub>3</sub>)<sub>2</sub></b> | <b>CuCl<sub>2</sub></b>                      | -                                  | <b>100 (91)</b>        | <b>1:0.6:0</b>                  |
| 20 <sup>i,j</sup>     | Pd(O <sub>2</sub> CCF <sub>3</sub> ) <sub>2</sub>   | CuCl <sub>2</sub>                            | -                                  | 61                     | 1:0.5:0                         |
| 21 <sup>i,k</sup>     | Pd(O <sub>2</sub> CCF <sub>3</sub> ) <sub>2</sub>   | CuCl <sub>2</sub>                            | -                                  | 100                    | 1:1:0.7                         |
| 22 <sup>i</sup>       | Pd(O <sub>2</sub> CCF <sub>3</sub> ) <sub>2</sub>   | -                                            | -                                  | 7                      | 1:0:0                           |
| 23 <sup>i,l</sup>     | Pd(O <sub>2</sub> CCF <sub>3</sub> ) <sub>2</sub>   | -                                            | -                                  | 69                     | 1:0:0                           |
| 24 <sup>i</sup>       | -                                                   | CuCl <sub>2</sub>                            | -                                  | 85                     | 1:0:0                           |
| 25 <sup>i,m</sup>     | -                                                   | CuCl <sub>2</sub>                            | -                                  | (27)                   | 1:0:0                           |
| 26                    | Pd(OAc) <sub>2</sub>                                | CuCl <sub>2</sub>                            | -                                  | 89                     | 1:1.3:0                         |
| <b>27<sup>i</sup></b> | <b>Pd(OAc)<sub>2</sub></b>                          | <b>CuCl<sub>2</sub></b>                      | -                                  | <b>98 (92)</b>         | <b>1:2.1:0</b>                  |
| 28 <sup>i</sup>       | Pd(OAc) <sub>2</sub>                                | Cu(OAc) <sub>2</sub>                         | -                                  | 17                     | 1:0:0                           |
| 29                    | PdCl <sub>2</sub>                                   | CuCl <sub>2</sub>                            | -                                  | 86                     | 1:0.9:0.2                       |
| 30                    | PdCl <sub>2</sub> (MeCN) <sub>2</sub>               | CuCl <sub>2</sub>                            | -                                  | 87                     | 1:0.9:0                         |
| 31                    | PdCl <sub>2</sub> (PPh <sub>3</sub> ) <sub>2</sub>  | CuCl <sub>2</sub>                            | -                                  | 77                     | 1:0:trace                       |
| 32                    | PdCl <sub>2</sub> (dppf)                            | CuCl <sub>2</sub>                            | -                                  | 68                     | 1:0.9:0                         |
| 33 <sup>i</sup>       | PdCl <sub>2</sub> (dppf)                            | CuCl <sub>2</sub>                            | -                                  | 55                     | 1:1:0                           |
| 34                    | Pd(OAc) <sub>2</sub>                                | CuCl <sub>2</sub>                            | LiCl (200)                         | 83                     | 1:1:0                           |
| <b>35<sup>i</sup></b> | <b>Pd(OAc)<sub>2</sub></b>                          | <b>CuCl<sub>2</sub></b>                      | <b>LiCl (200)</b>                  | <b>95 (92)</b>         | <b>1:1.8:0</b>                  |
| 36 <sup>i</sup>       | PdCl <sub>2</sub> (dppf)                            | CuCl <sub>2</sub>                            | LiCl (200)                         | 46                     | 1:1.4:0                         |
| 37                    | Pd(OAc) <sub>2</sub>                                | CuCl <sub>2</sub>                            | LiBr (200)                         | 58                     | 1:0.5:0.3                       |
| 38                    | Pd(OAc) <sub>2</sub>                                | CuCl <sub>2</sub>                            | NaI (200)                          | 72                     | 1:0.3:0                         |
| 39                    | Pd(OAc) <sub>2</sub>                                | CuCl <sub>2</sub>                            | <i>n</i> Bu <sub>4</sub> NCl (200) | 47                     | 1:0:0                           |
| 40                    | Pd(OAc) <sub>2</sub>                                | CuCl <sub>2</sub>                            | dppf (5)                           | 38 <sup>n</sup>        | 1:0.1:0                         |
| 41 <sup>i</sup>       | Pd(OAc) <sub>2</sub>                                | CuCl <sub>2</sub>                            | dppf (5)                           | 15                     | 1:0:0                           |
| 42                    | Pd(OAc) <sub>2</sub>                                | CuCl <sub>2</sub>                            | dppp (5)                           | 86                     | 1:0:0.1                         |
| 43                    | Pd(OAc) <sub>2</sub>                                | CuCl <sub>2</sub>                            | dppe (5)                           | 64                     | 1:trace:0                       |

|                   |                                                   |                   |                                     |       |             |
|-------------------|---------------------------------------------------|-------------------|-------------------------------------|-------|-------------|
| 44                | Pd(OAc) <sub>2</sub>                              | CuCl <sub>2</sub> | (S)-BINAP (5)                       | 85    | 1:trace:0.1 |
| 45                | Pd(OAc) <sub>2</sub>                              | CuCl <sub>2</sub> | Xantphos (5)                        | 80    | 1:trace:0.1 |
| 46                | Pd(OAc) <sub>2</sub>                              | CuCl <sub>2</sub> | Sphos (10)                          | 68    | 1:0:0       |
| 47                | Pd(OAc) <sub>2</sub>                              | CuCl <sub>2</sub> | P( <i>o</i> -Tol) <sub>3</sub> (10) | 59    | 1:0:0.1     |
| 48                | Pd(OAc) <sub>2</sub>                              | CuCl <sub>2</sub> | 2,2'-bipyridine (5)                 | 85    | 1:0.1:0.1   |
| 49                | Pd(OAc) <sub>2</sub>                              | CuCl <sub>2</sub> | phenanthroline (5)                  | 95    | 1:0.1:0.1   |
| 50                | Pd(OAc) <sub>2</sub>                              | CuCl <sub>2</sub> | TMEDA (5)                           | 75    | 1:trace:0   |
| 51                | Pd(OAc) <sub>2</sub>                              | CuCl <sub>2</sub> | IMes·HCl (10)                       | 93    | 1:0:0       |
| 52 <sup>i,o</sup> | Pd(O <sub>2</sub> CCF <sub>3</sub> ) <sub>2</sub> | CuCl <sub>2</sub> | -                                   | (100) | 1:0.3:0     |
| 53 <sup>i,p</sup> | Pd(O <sub>2</sub> CCF <sub>3</sub> ) <sub>2</sub> | CuCl <sub>2</sub> | -                                   | (88)  | 1:0.06:0    |
| 54 <sup>i,q</sup> | Pd(O <sub>2</sub> CCF <sub>3</sub> ) <sub>2</sub> | CuCl <sub>2</sub> | -                                   | 20-57 | 1:0:0       |

All reactions were carried out 2-5 times repetitively and the average values of both yields and ratios are given. <sup>a</sup> Yields were determined by <sup>1</sup>H NMR using trichloroethylene as an internal standard. Value in parentheses indicates an isolated yield. <sup>b</sup> Ratios of inseparable isomers were determined by <sup>1</sup>H NMR. <sup>c</sup> Instead of Cl, OAc was introduced at C3 position. <sup>d</sup> In toluene. <sup>e</sup> In heptane. <sup>f</sup> In 1,4-dioxane, MeCN, EtOAc, or DMF. <sup>g</sup> In DMSO or AcOH. <sup>h</sup> At 100 °C. <sup>i</sup> At 150 °C. <sup>j</sup> Using 1 equiv CuCl<sub>2</sub>. <sup>k</sup> Using 3 equiv CuCl<sub>2</sub>. <sup>l</sup> Using 1 equiv Pd(O<sub>2</sub>CCF<sub>3</sub>)<sub>2</sub>. <sup>m</sup> Using 20 mol% CuCl<sub>2</sub> under O<sub>2</sub> (1 atm). <sup>n</sup> *N*-Ts-2-phenylindoline was obtained in 8%. <sup>o</sup> In the presence of 1 equiv Na<sub>2</sub>CO<sub>3</sub>. <sup>p</sup> In the presence of 1 equiv K<sub>2</sub>CO<sub>3</sub>. <sup>q</sup> In the presence of 1 equiv NEt<sub>3</sub>, (*i*Pr)<sub>2</sub>NEt, or DMAP.

**Table S2. Effect of *N*-Protecting Groups**

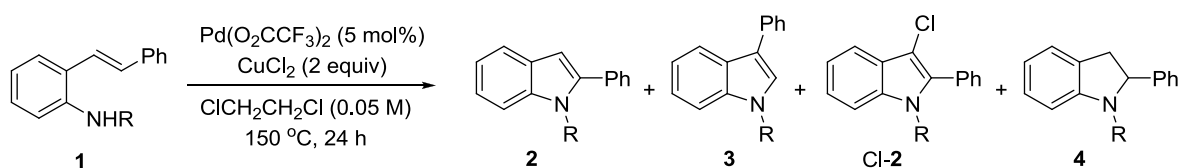

| Entry | R                                                                       | Yield (%) <sup>a</sup> | 2:3:Cl-2 <sup>b</sup> |
|-------|-------------------------------------------------------------------------|------------------------|-----------------------|
| 1     | Ts ( <b>1a</b> )                                                        | <b>91 (0)</b>          | <b>1:0.6:0</b>        |
| 2     | PhSO <sub>2</sub>                                                       | 88 (0)                 | 1:0.2:0               |
| 3     | <i>p</i> -NO <sub>2</sub> C <sub>6</sub> H <sub>4</sub> SO <sub>2</sub> | 85 (0)                 | 1:0.4:0               |
| 4     | (2-pyridinyl)SO <sub>2</sub>                                            | 80 (0)                 | 1:0:0                 |
| 5     | Tf                                                                      | 96 (0)                 | 1:0:0                 |
| 6     | Ms                                                                      | 90 (15)                | 1:0.3:0               |
| 7     | Ac                                                                      | - <sup>c-d</sup>       | -                     |
| 8     | Piv                                                                     | - <sup>c</sup>         | -                     |
| 9     | Bz                                                                      | - <sup>c-d</sup>       | -                     |
| 10    | C <sub>6</sub> F <sub>5</sub> CO                                        | - <sup>c-d</sup>       | -                     |
| 11    | (2-pyridinyl)CO                                                         | - <sup>c</sup>         | -                     |
| 12    | CO <sub>2</sub> Et                                                      | 68 (11)                | 1:0:0.3               |
| 13    | Cbz                                                                     | 66 (5)                 | 1:0:0.5               |
| 14    | Boc                                                                     | - <sup>e</sup>         | -                     |
| 15    | Bn                                                                      | - <sup>d-e</sup>       | -                     |
| 16    | H                                                                       | - <sup>d-e</sup>       | -                     |

All reactions were carried out 2-5 times repetitively and the average values of both yields and ratios are given. <sup>a</sup> Isolated yield. Value in parentheses indicates a yield of **4**. <sup>b</sup> Ratios of inseparable isomers were determined by <sup>1</sup>H NMR. <sup>c</sup> Complex mixture. <sup>d</sup> 30-60% of starting material remained unreacted. <sup>e</sup> Decomposed.

**Table S3. Substrate Scope:  $\beta$ -Monosubstituted Alkenes**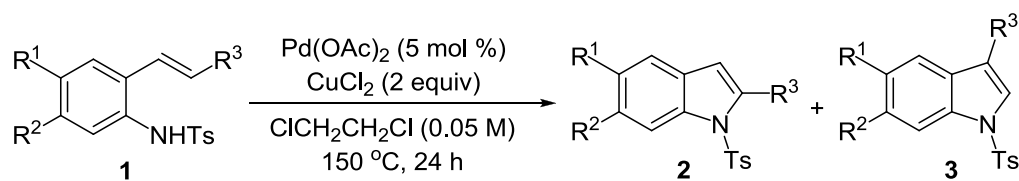

| Entry           | R <sup>1</sup>  | R <sup>2</sup>  | R <sup>3</sup>                                                | Yield (%) <sup>a</sup> | 2:3 <sup>b</sup>          |
|-----------------|-----------------|-----------------|---------------------------------------------------------------|------------------------|---------------------------|
| 1               | H               | H               | Ph ( <b>1a</b> )                                              | 92                     | 1:2.1                     |
| 2               | H               | H               | Ph (( <i>Z</i> )- <b>1a</b> )                                 | 87 <sup>c</sup>        | 1:0.7                     |
| 3 <sup>d</sup>  | H               | H               | 4-MeOC <sub>6</sub> H <sub>4</sub> ( <b>1b</b> )              | 80 <sup>c</sup>        | 1:2.1 (:0.5) <sup>e</sup> |
| 4               | H               | H               | 4-MeC <sub>6</sub> H <sub>4</sub>                             | 93 <sup>c</sup>        | 1:1.9 (:0.2) <sup>e</sup> |
| 5               | H               | H               | 3-MeC <sub>6</sub> H <sub>4</sub> ( <b>1c</b> )               | 77 <sup>c,f</sup>      | 1:0.9                     |
| 6               | H               | H               | 2-MeC <sub>6</sub> H <sub>4</sub>                             | 92 <sup>c</sup>        | 1:2.1                     |
| 7               | H               | H               | 4-ClC <sub>6</sub> H <sub>4</sub> ( <b>1d</b> )               | 85                     | 1:0.6                     |
| 8               | H               | H               | 4-NO <sub>2</sub> C <sub>6</sub> H <sub>4</sub> ( <b>1e</b> ) | 91                     | 1:0                       |
| 9               | H               | H               | 3-CF <sub>3</sub> C <sub>6</sub> H <sub>4</sub>               | 90                     | 1:0                       |
| 10 <sup>g</sup> | H               | H               | CO <sub>2</sub> Me ( <b>1f</b> )                              | 60 <sup>f</sup>        | 1:0                       |
| 11              | H               | H               | <i>n</i> Hex ( <b>1g</b> )                                    | 20                     | 1:0                       |
| 12              | Me              | H               | Ph ( <b>1h</b> )                                              | 85 <sup>c</sup>        | 1:0.5                     |
| 13              | Cl              | H               | Ph                                                            | 91                     | 1:2                       |
| 14 <sup>h</sup> | NO <sub>2</sub> | H               | Ph ( <b>1i</b> )                                              | 90                     | 1:3.8                     |
| 15              | H               | Me              | Ph                                                            | 89                     | 1:0.3 (:0.1) <sup>e</sup> |
| 16 <sup>h</sup> | H               | Cl              | Ph ( <b>1j</b> )                                              | 98                     | 1:0.8                     |
| 17 <sup>h</sup> | H               | NO <sub>2</sub> | Ph ( <b>1k</b> )                                              | 82 <sup>f</sup>        | 1:1.1                     |

All reactions were carried out 3-5 times repetitively and the average values of both yields and ratios are given. <sup>a</sup> Isolated yield. <sup>b</sup> Ratios of inseparable isomers were determined by <sup>1</sup>H NMR. <sup>c</sup> ~5% of the corresponding 2-substituted indoline was obtained. <sup>d</sup> For 6 h. <sup>e</sup> The ratio of *N*-Ts-2-aryl-3-chloro-substituted indole (Cl-**2**). <sup>f</sup> The remainder of the mass balance was unreacted starting material. <sup>g</sup> Using 20 mol% Pd(OAc)<sub>2</sub>. <sup>h</sup> Using 10 mol% Pd(OAc)<sub>2</sub>.

**Table S4. Substrate Scope:  $\beta,\beta$ -Disubstituted Alkenes**

| Entry          | Substrate                                                                                        | Product (%) <sup>a</sup>             |
|----------------|--------------------------------------------------------------------------------------------------|--------------------------------------|
|                |                                                                                                  |                                      |
|                |                                                                                                  |                                      |
| 1              | 4-MeOC <sub>6</sub> H <sub>4</sub> 4-CF <sub>3</sub> C <sub>6</sub> H <sub>4</sub> ( <b>1l</b> ) | 78% (85%) ( <b>3l</b> )              |
| 2              | 4-MeC <sub>6</sub> H <sub>4</sub> 4-CF <sub>3</sub> C <sub>6</sub> H <sub>4</sub> ( <b>1m</b> )  | 47% (96%) ( <b>3m</b> )              |
| 3              | Ph    4-CF <sub>3</sub> C <sub>6</sub> H <sub>4</sub> ( <b>1n</b> )                              | 42% (89%) ( <b>3n</b> ) <sup>b</sup> |
| 4              | Ph    Ph                                                                                         | 73% (94%)                            |
| 5 <sup>c</sup> | <br><b>1o</b>                                                                                    | <br>64% (83%) ( <b>3o</b> )          |
| 6 <sup>c</sup> | <br><b>1p</b>                                                                                    | <br>51% ( <b>3p</b> )                |
|                |                                                                                                  | <br>31% ( <b>4</b> )                 |

<sup>a</sup> Isolated yield. Value in parentheses indicates a yield based on recovered starting material. <sup>b</sup> ~5% of **2a** was obtained. <sup>c</sup> Using 10 mol% Pd(OAc)<sub>2</sub>.

## General Procedure for the Preparation of *N*-Ts-2-Alkenylanilines

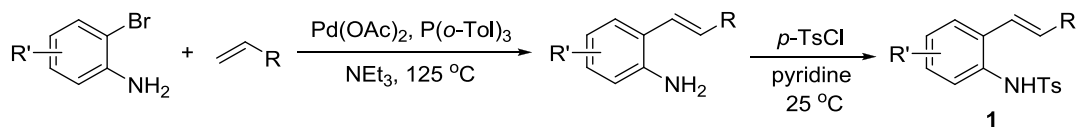

To a solution of 2-bromoaniline (2.7 g, 15.52 mmol, 1 equiv) in NEt<sub>3</sub> (15.0 mL, 1.0 M) were added Pd(OAc)<sub>2</sub> (34.8 mg, 0.155 mmol, 1 mol%), P(*o*-Tol)<sub>3</sub> (398.0 mg, 1.241 mmol, 8 mol%), and olefin (18.62 mmol, 1.2 equiv). After being stirred at 125 °C overnight, the reaction mixture was poured into water and then the product was extracted with CH<sub>2</sub>Cl<sub>2</sub> (three times). The combined organic layer was washed with brine, dried over MgSO<sub>4</sub>, and concentrated in vacuo. The residue was purified by column chromatography on silica gel to afford the corresponding 2-styrylaniline product. To a solution of 2-styrylaniline (1 equiv) in pyridine (0.2 M) was added *p*-toluenesulfonyl chloride (1.1 equiv) at 0 °C. After being stirred at 25 °C for 2 hours, the reaction mixture was poured into water and then the product was extracted with CH<sub>2</sub>Cl<sub>2</sub> (three times), dried over MgSO<sub>4</sub>, and concentrated in vacuo. The residue was purified by column chromatography on silica gel to give the corresponding product **1**.

### (*E*)-Methyl 3-(2-(4-Methylphenylsulfonamido)phenyl)acrylate (**1f**)

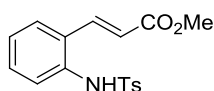

Following the general procedure: 32% (step 1), 85% (step 2), a yellow solid (EtOAc : *n*-Hexane = 1:4 (step 1), 1:2 (step 2)), mp 160-162 °C.

<sup>1</sup>H NMR (CDCl<sub>3</sub>, 400 MHz) δ 2.37 (s, 3H), 3.79 (s, 3H), 6.15 (d, *J* = 15.6 Hz, 1H), 6.70 (br s, 1H), 7.20 (d, *J* = 7.6 Hz, 2H), 7.24 (t, *J* = 7.6 Hz, 1H), 7.35 (t, *J* = 8.0 Hz, 1H), 7.39 (d, *J* = 7.6 Hz, 1H), 7.45 (d, *J* = 7.2 Hz, 1H), 7.51 (d, *J* = 16.0 Hz, 1H), 7.56 (d, *J* = 8.4 Hz, 2H). <sup>13</sup>C NMR (CDCl<sub>3</sub>, 100 MHz) δ 21.5, 51.9, 120.4, 127.2, 127.3, 129.6, 129.7, 130.3, 130.9, 134.6, 135.8, 138.98, 139.03, 144.0, 166.8. EIMS *m/z* 331 (M<sup>+</sup>), 234, 176, 144, 132, 117, 91, 65, 51.

Spectral data were consistent with data reported in the literature.<sup>2</sup>

## General Procedure for the Preparation of β,β-Disubstituted 2-Alkenylanilines

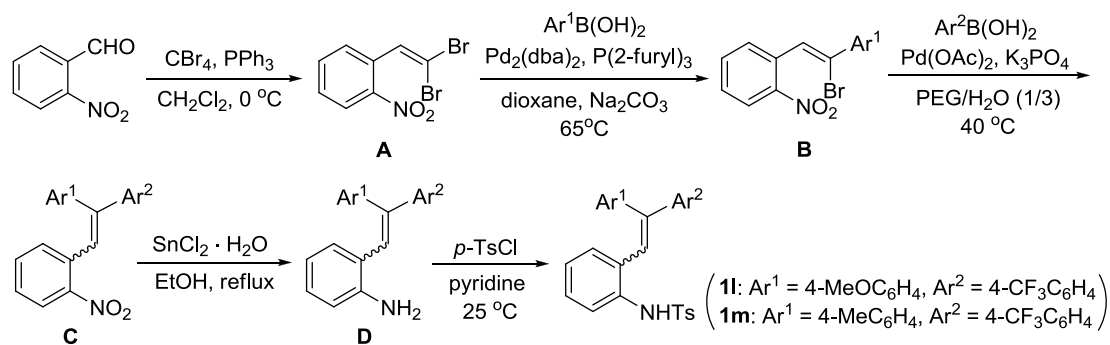

<sup>2</sup> Zhu, J.-B.; Wang, P.; Liao, S.; Tang, Y. *Org. Lett.* **2013**, *15*, 3054.

To a solution of 2-nitrobenzaldehyde (976.2 mg, 6.459 mmol, 1 equiv) and CBr<sub>4</sub> (4.3 g, 12.91 mmol, 2 equiv) in CH<sub>2</sub>Cl<sub>2</sub> (16.1 ml, 0.4 M) at 0 °C was added dropwise a solution of PPh<sub>3</sub> (6.8 g, 25.84 mmol, 4 equiv) in CH<sub>2</sub>Cl<sub>2</sub> (16 ml, 0.4 M). After addition (~1 h), the mixture was stirred for another 0.5 h before warmed to rt, and stirred for an additional 1 h. The reaction mixture was filtered through a short plug of silical gel, and was washed with a copious amount of CH<sub>2</sub>Cl<sub>2</sub> until no product was found. Solvent was concentrated *in vacuo*. The residue was purified by column chromatography on silica gel (EtOAc : *n*-Hexane = 1:7) to give the corresponding product **A** (1.7 g, 85%) as an orange solid.

A mixture of **A** (1 equiv), Pd<sub>2</sub>(dba)<sub>3</sub> (3 mol%), P(2-furyl)<sub>3</sub> (15 mol%), and Ar<sup>1</sup>B(OH)<sub>2</sub> (1 equiv) in 1,4-dioxane (0.1 M) was stirred at rt under argon for 5 min. An aq. Na<sub>2</sub>CO<sub>3</sub> solution (1.0 M, 2 equiv) was added and the reaction mixture was heated at 65 °C for 23 h. The reaction mixture was then extracted with ether (3 times) and dried over MgSO<sub>4</sub>, and concentrated *in vacuo*. The residue was purified by column chromatography on silica gel to give the corresponding product **B**.

To a solution of **B** in mixed solvent (PEG : H<sub>2</sub>O = 1:3, 0.15 M) were added Ar<sup>2</sup>B(OH)<sub>2</sub> (1.25 equiv), Pd(OAc)<sub>2</sub> (4 mol%), and K<sub>3</sub>PO<sub>4</sub> (2 equiv). The reaction mixture was stirred at 40 °C for 24 h. After cooling to rt, the mixture was diluted with water, extracted with CH<sub>2</sub>Cl<sub>2</sub> (3 times), dried over MgSO<sub>4</sub>, and concentrated *in vacuo*. The residue was purified by column chromatography on silica gel to give the corresponding product **C**.

The suspension of **C** (1 equiv) and SnCl<sub>2</sub>·H<sub>2</sub>O (5 equiv) in EtOH (0.4 M) was heated at 100 °C for 30 min, and then cooled to rt. After most of EtOH was removed, the residue was taken into Et<sub>2</sub>O and sat. K<sub>2</sub>CO<sub>3</sub> solution. The reaction mixture was extracted with EtOAc (three times), dried over MgSO<sub>4</sub>, and concentrated *in vacuo*. The residue was purified by column chromatography on silica gel to give the corresponding product **D**.

**11-1m** were prepared from **D** following a general procedure for tosylation. The stereochemistry of olefin **11-1m** could not be determined.

***N*-(2-(2-(4-Methoxyphenyl)-2-(4-(trifluoromethyl)phenyl)vinyl)phenyl)-4-methylbenzenesulfonamide (11)**

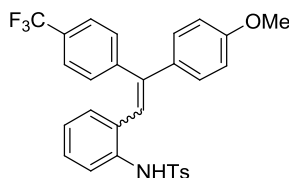

*E/Z* mixture was obtained with a 3:1 ratio. an orange solid (EtOAc : *n*-Hexane = 1 : 4), mp 70-72 °C. Signals corresponding to major isomer: <sup>1</sup>H NMR (CDCl<sub>3</sub>, 400 MHz) δ 2.41 (s, 3H), 3.82 (s, 3H), 6.42 (s, 1H), 6.65 (d, *J* = 7.6 Hz, 1H), 6.81-6.89 (m, 1H), 6.82 (d, *J* = 8.8 Hz, 2H), 7.00 (d, *J* = 8.4 Hz, 4H), 7.10 (t, *J* = 7.8 Hz, 1H), 7.20 (d, *J* = 7.6 Hz, 2H), 7.40 (d, *J* = 8.0 Hz, 3H), 7.59 (d, *J* = 8.4 Hz, 2H). Representative signals corresponding to minor isomer: <sup>1</sup>H NMR (CDCl<sub>3</sub>, 400 MHz) δ 2.41 (s, 3H), 3.77 (s, 3H), 6.40 (s, 1H), 6.73 (d, *J* = 8.8 Hz, 2H), 6.93 (t, *J* = 7.6 Hz, 1H), 7.38 (d, *J* = 8.0 Hz, 1H), 7.52 (t, *J* = 7.2 Hz, 1H), 7.53 (d, *J* = 7.2 Hz, 2H). <sup>13</sup>C NMR (CDCl<sub>3</sub>, 100 MHz) δ 21.5,



55.1, 55.3, 113.6, 113.7, 114.0, 122.2, 123.8 (q,  $J = 270.6$  Hz), 123.9, 124.1, 124.5, 125.0 (q,  $J = 4.4$  Hz), 125.1 (q,  $J = 3.7$  Hz), 125.5, 125.6, 127.08, 127.14, 128.1, 128.2, 128.3, 129.05 (q,  $J = 33.8$  Hz), 129.09, 129.5, 129.6, 130.4, 130.6 (q,  $J = 30.8$  Hz), 130.8, 131.5, 134.0, 134.2, 134.5, 136.9, 143.2, 143.7, 143.8, 144.0, 144.4, 146.4, 149.6, 159.4, 159.8 (only distinguishable peaks; 5 carbons are missing due to overlapping). HREIMS  $m/z$  546.1321 ( $M+Na$ )<sup>+</sup>, calcd for C<sub>29</sub>H<sub>24</sub>F<sub>3</sub>NNaO<sub>3</sub>S 546.1321.

#### 4-Methyl-*N*-(2-(2-*p*-tolyl-2-(4-(trifluoromethyl)phenyl)vinyl)phenyl)benzenesulfonamide (**1m**)

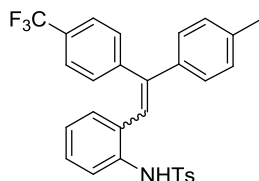

*E/Z* mixture was obtained with a 2.3:1 ratio. a yellow solid (EtOAc : *n*-Hexane = 1 : 6), mp 168-170 °C.

Signals corresponding to major isomer: <sup>1</sup>H NMR (CDCl<sub>3</sub>, 400 MHz) δ 2.39 (s, 3H), 2.43 (s, 3H), 6.41 (s, 1H), 6.55 (br s, 1H), 6.67 (d,  $J = 7.6$  Hz, 1H), 6.86 (t,  $J = 7.6$  Hz, 1H), 6.96 (d,  $J = 8.4$  Hz, 2H), 7.00 (d,  $J = 8.4$  Hz, 2H), 7.13-7.21 (m, 1H), 7.14 (d,  $J = 7.6$  Hz, 2H), 7.23 (d,  $J = 7.6$  Hz, 2H), 7.41 (d,  $J = 8.4$  Hz, 2H), 7.54 (d,  $J = 7.6$  Hz, 1H), 7.60 (d,  $J = 8.4$  Hz, 2H). Representative signals corresponding to minor isomer: <sup>1</sup>H NMR (CDCl<sub>3</sub>, 400 MHz) δ 2.32 (s, 3H), 2.43 (s, 3H), 6.37 (s, 1H), 6.43 (br s, 1H), 6.80 (d,  $J = 8.0$  Hz, 2H), 7.54 (d,  $J = 7.6$  Hz, 2H). <sup>13</sup>C NMR (CDCl<sub>3</sub>, 100 MHz) δ 21.2, 21.3, 21.57, 21.58, 122.9, 123.6, 124.0 (q,  $J = 269.8$  Hz), 124.4, 124.5, 125.0 (q,  $J = 3.7$  Hz), 125.1 (q,  $J = 3.7$  Hz), 125.5, 125.7, 127.1, 127.2, 127.5, 127.8, 128.3, 129.1, 129.4, 129.6, 129.7, 129.8, 130.1, 130.4, 130.5, 130.6, 130.7, 131.3, 133.6, 133.9, 134.5, 135.1, 136.9, 137.0, 138.3, 138.6, 138.8, 143.0, 143.8, 144.0, 144.6, 145.1, 146.2 (only distinguishable peaks; 2 carbons are missing due to overlapping). HREIMS  $m/z$  530.1372 ( $M+Na$ )<sup>+</sup>, calcd for C<sub>29</sub>H<sub>24</sub>F<sub>3</sub>NNaO<sub>2</sub>S 530.1372.

#### General Procedure for the Pd(II)-Catalyzed Aza-Wacker-Type Cyclization of *N*-Ts-2-Alkenylanilines **1**

To a solution of **1** (0.0677 mmol, 1 equiv) in ClCH<sub>2</sub>CH<sub>2</sub>Cl (1.3 mL, 0.05 M) in pressure tube were added Pd(OAc)<sub>2</sub> (0.8 mg, 0.00339 mmol, 5 mol %) and CuCl<sub>2</sub> (18.2 mg, 0.136 mmol, 2 equiv). The resulting mixture was stirred at 150 °C for the reported time. After the reaction was completed, the reaction mixture was concentrated *in vacuo*. The residue was purified by column chromatography on silica gel to afford the corresponding product **2** or **3**. All reactions were carried out 3-5 times repetitively and the average values of both yields and ratios are given. In most cases, the remainder of the mass balance was unreacted starting material.

### *N*-Ts-2-Phenylindole (**2a**) & *N*-Ts-3-Phenylindole (**3a**)

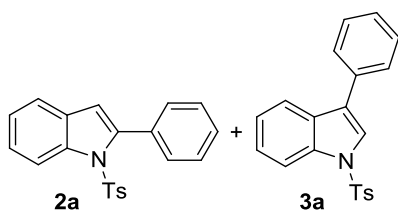

92% (**2a** : **3a** = 1 : 2.1), 87% (**2a** : **3a** = 1 : 0.7, from (*Z*)-**1a**), a white solid (EtOAc : *n*-Hexane = 1 : 8).

<sup>1</sup>H NMR (CDCl<sub>3</sub>, 400 MHz) δ 2.28 (s, 3H of **2a**), 2.34 (s, 3H of **3a**), 6.55 (s, 1H of **2a**), 7.04 (d, *J* = 8.4 Hz, 2H of **2a**), 7.23 (d, *J* = 8.4 Hz, 2H of **3a**), 7.26-7.31 (m, 3H of **2a** & 1H of **3a**), 7.36-7.40 (m, 1H of **2a** & 2H of **3a**), 7.44-7.53 (m, 6H of **2a** & 2H of **3a**), 7.61 (d, *J* = 7.2 Hz, 2H of **3a**), 7.71 (s, 1H of **3a**), 7.79 (d, *J* = 8.4 Hz, 1H of **3a**), 7.82 (d, *J* = 8.4 Hz, 2H of **3a**), 8.07 (d, *J* = 8.4 Hz, 1H of **3a**), 8.33 (d, *J* = 8.0 Hz, 1H of **2a**). <sup>13</sup>C NMR (CDCl<sub>3</sub>, 100 MHz) δ 21.49, 21.54, 113.6, 113.8, 116.6, 120.4, 120.7, 122.9, 123.5, 123.9, 124.3, 124.7, 124.9, 126.8, 126.9, 127.46, 127.51, 127.9, 128.6, 128.9, 129.2, 129.3, 129.9, 130.3, 130.5, 132.4, 133.0, 134.6, 135.1, 135.5, 138.2, 142.1, 144.5, 145.0. EIMS (**2a**) *m/z* 347 (M<sup>+</sup>), 208, 192, 177, 165, 139, 115, 91, 77, 65, 51. EIMS (**3a**) *m/z* 347 (M<sup>+</sup>), 267, 192, 165, 139, 115, 102, 91, 77, 65, 51.

Spectral data of **2a**<sup>1, 3</sup> and **3a**<sup>1, 4</sup> were consistent with data reported in the literature.

### *N*-Ts-2-(4-Methoxyphenyl)indole (**2b**), *N*-Ts-3-(4-Methoxyphenyl)indole (**3b**), & *N*-Ts-3-Chloro-2-(4-methoxyphenyl)indole (Cl-**2b**)

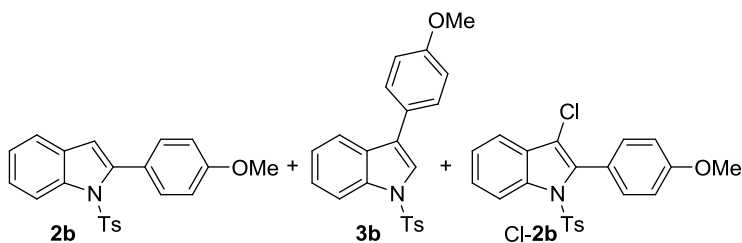

80% (**2b** : **3b** : Cl-**2b** = 1 : 2.1 : 0.5), a yellow solid (EtOAc : *n*-Hexane = 1 : 7).

<sup>1</sup>H NMR (CDCl<sub>3</sub>, 400 MHz) δ 2.28 (s, 3H of **2b**), 2.31 (s, 3H of Cl-**2b**), 2.34 (s, 3H of **3b**), 3.87 (s, 3H of **3b**), 3.89 (s, 3H of **2b**), 3.91 (s, 3H of Cl-**2b**), 6.48 (s, 1H of **2b**), 6.96 (d, *J* = 8.8 Hz, 2H of **2b**), 7.00 (d, *J* = 8.8 Hz, 2H of **3b**), 7.04 (d, *J* = 8.4 Hz, 2H of **2b**), 7.07 (d, *J* = 8.0 Hz, 2H of Cl-**2b**), 7.21-7.47 (m, 7H of **2b**, 4H of **3b**, & 9H of Cl-**2b**), 7.53 (d, *J* = 8.0 Hz, 2H of **3b**), 7.63 (s, 1H of **3b**), 7.74 (d, *J* = 7.6 Hz, 1H of **3b**), 7.80 (d, *J* = 8.0 Hz, 2H of **3b**), 8.05 (d, *J* = 8.4 Hz, 1H of **3b**), 8.31 (d, *J* = 8.8 Hz, 1H of **2b**), 8.35 (d, *J* = 8.4 Hz, 1H of Cl-**2b**). <sup>13</sup>C NMR (CDCl<sub>3</sub>, 100 MHz) δ 21.48, 21.53, 55.28, 55.34, 112.8, 112.9, 113.0, 113.8, 113.9, 114.3, 116.5, 116.6, 118.5, 120.37, 120.44, 121.3, 122.3, 123.4, 123.7, 124.2, 124.5, 124.6, 124.7, 124.8, 125.4, 125.9, 126.76, 126.84, 127.05, 127.11, 127.3, 129.0, 129.1, 129.3, 129.46, 129.52, 129.9, 130.6, 131.6, 132.8, 134.7, 135.2,

<sup>3</sup> Yin, Y.; Ma, W.; Chai, Z.; Zhao, G. *J. Org. Chem.* **2007**, *72*, 5731.

<sup>4</sup> Kudo, N.; Perseghini, M.; Fu, G. C. *Angew. Chem., Int. Ed.* **2006**, *45*, 1282.

135.5, 138.1, 142.0, 144.4, 144.9, 159.2, 160.0, 160.2 (4 carbons are missing due to overlapping). EIMS (**2b**)  $m/z$  377 (M), 222, 207, 195, 178, 165, 152, 139, 126, 102, 91, 77, 65. EIMS (**3b**)  $m/z$  377 ( $M^+$ ), 222, 207, 178, 152, 91, 65, 51. EIMS (Cl-**2b**)  $m/z$  411 ( $M^+$ ), 355, 327, 281, 256, 207, 178, 133, 96, 73, 65, 51.

Spectral data of **2b** and **3b** were consistent with data reported in the literature.<sup>1, 5-6</sup>

### *N*-Ts-2-*p*-Tolylyndole (**2**), *N*-Ts-3-*p*-Tolylyndole (**3**), & *N*-Ts-3-Chloro-2-*p*-tolylyndole (Cl-**2**)

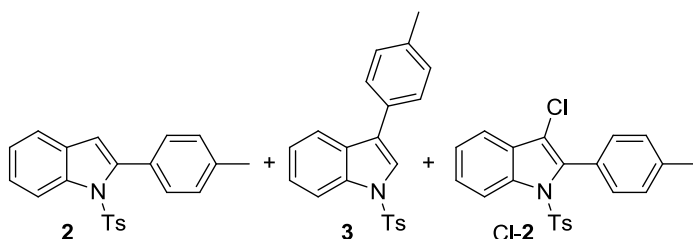

93% (**2** : **3** : Cl-**2** = 1 : 1.9 : 0.2), a yellow oil (EtOAc : *n*-Hexane = 1 : 7).

<sup>1</sup>H NMR (CDCl<sub>3</sub>, 400 MHz)  $\delta$  2.27 (s, 3H of **2**), 2.30 (s, 3H of Cl-**2**), 2.32 (s, 3H of **2**), 2.40 (s, 3H of **3**), 2.43 (s, 3H of **2**), 2.45 (s, 3H of Cl-**2**), 6.50 (s, 1H of **2**), 7.03 (d,  $J = 7.6$  Hz, 2H of **2**), 7.07 (m, 2H of Cl-**2**), 7.14-7.31 (m, 5H of **2**, 4H of **3**, & 9H of Cl-**2**), 7.31-7.43 (m, 4H of **2** & 2H of **3**), 7.49 (d,  $J = 7.6$  Hz, 2H of **3**), 7.66 (s, 1H of **3**), 7.76 (d,  $J = 8.4$  Hz, 1H of **3**), 7.79 (d,  $J = 8.0$  Hz, 2H of **3**), 8.04 (d,  $J = 8.4$  Hz, 1H of **3**), 8.29 (d,  $J = 8.0$  Hz, 1H of **2**), 8.33 (d,  $J = 8.2$  Hz, 1H of Cl-**2**). <sup>13</sup>C NMR (CDCl<sub>3</sub>, 100 MHz)  $\delta$  21.2, 21.42, 21.49, 21.54, 113.3, 113.8, 116.5, 116.6, 118.6, 120.4, 120.5, 122.7, 123.5, 124.0, 124.2, 124.4, 124.58, 124.64, 124.8, 125.9, 126.0, 126.8, 126.9, 127.1, 127.7, 128.2, 128.3, 129.1, 129.2, 129.3, 129.4, 129.47, 129.52, 129.6, 129.9, 130.1, 130.2, 130.6, 131.2, 134.6, 135.2, 135.5, 137.3, 138.2, 138.6, 142.3, 144.4, 144.9 (6 carbons are missing due to overlapping). EIMS (**2**)  $m/z$  361 ( $M^+$ ), 206, 179, 65. EIMS (**3**)  $m/z$  361 ( $M^+$ ), 206, 178, 91, 65. EIMS (Cl-**2**)  $m/z$  395 ( $M^+$ ), 240, 213, 205, 155, 123.

Spectral data of **2** were consistent with data reported in the literature.<sup>1, 5</sup>

### *N*-Ts-2-*m*-Tolylyndole (**2c**) & *N*-Ts-3-*m*-Tolylyndole (**3c**)

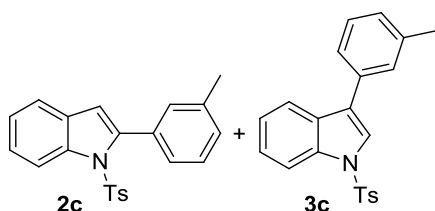

77% (**2c** : **3c** = 1 : 0.9), a yellow solid (EtOAc : *n*-Hexane = 1 : 7).

<sup>1</sup>H NMR (CDCl<sub>3</sub>, 400 MHz)  $\delta$  2.29 (s, 3H of **2c**), 2.34 (s, 3H of **3c**), 2.42 (s, 3H of **2c**), 2.43 (s, 3H of **3c**), 6.53 (s, 1H of **2c**), 7.05 (d,  $J = 8.0$  Hz, 2H of **2c**), 7.19-7.36 (m, 8H of **2c** & 6H of **3c**), 7.42 (d,  $J = 8.0$  Hz, 2H of **3c**), 7.44 (d,  $J = 9.2$  Hz, 1H of **2c**), 7.69 (s, 1H of **3c**), 7.79 (d,  $J = 8.0$  Hz, 1H

<sup>5</sup> Palimkar, S. S.; Kumar, P. H.; Lahoti, R. J.; Srinivasan, K. V. *Tetrahedron* **2006**, *62*, 5109.

<sup>6</sup> Monguchi, Y.; Mori, S.; Aoyagi, S.; Tsutsui, A.; Maegawa, T.; Sajiki, H. *Org. Biomol. Chem.* **2010**, *8*, 3338.

of **3c**), 7.81 (d,  $J = 8.4$  Hz, 2H of **3c**), 8.06 (d,  $J = 8.4$  Hz, 1H of **3c**), 8.31 (d,  $J = 8.4$  Hz, 1H of **2c**).  $^{13}\text{C}$  NMR ( $\text{CDCl}_3$ , 100 MHz)  $\delta$  21.4, 21.49, 21.54, 113.3, 113.8, 116.6, 120.5, 120.6, 122.9, 123.5, 124.1, 124.2, 124.7, 124.8, 125.0, 126.8, 126.9, 127.4, 128.3, 128.6, 128.8, 129.1, 129.4, 129.9, 130.5, 131.0, 132.3, 133.0, 134.8, 135.2, 135.5, 137.0, 138.2, 138.6, 142.3, 144.4, 145.0 (3 carbons are missing due to overlapping). EIMS (**2c**)  $m/z$  361 ( $\text{M}^+$ ), 222, 206, 191, 179, 164, 152, 139, 115, 102, 91, 77, 65, 51. EIMS (**3c**)  $m/z$  361 ( $\text{M}^+$ ), 206, 178, 152, 91, 77, 65, 51. Spectral data of **2c** were consistent with data reported in the literature.<sup>1,6</sup>

### *N*-Ts-2-*o*-Tolyindole (**2**) & *N*-Ts-3-*o*-Tolyindole (**3**)

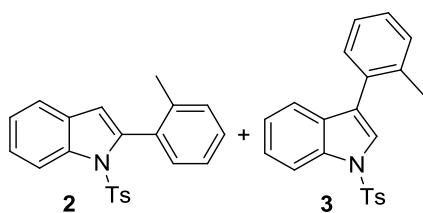

92% (**2** : **3** = 1 : 2.1), a yellow oil (EtOAc : *n*-Hexane = 1 : 7).

$^1\text{H}$  NMR ( $\text{CDCl}_3$ , 400 MHz)  $\delta$  2.22 (s, each 3H of **2** & **3**), 2.32 (s, 3H of **2**), 2.35 (s, 3H of **3**), 6.46 (s, 1H of **2**), 7.09 (d,  $J = 8.4$  Hz, 3H of **2**), 7.19-7.36 (m, 7H of **2** & 9H of **3**), 7.50 (d,  $J = 7.6$  Hz, 1H of **2**), 7.53 (s, 1H of **3**), 7.80 (d,  $J = 8.4$  Hz, 2H of **3**), 8.05 (d,  $J = 9.2$  Hz, 1H of **3**), 8.33 (d,  $J = 8.4$  Hz, 1H of **2**).  $^{13}\text{C}$  NMR ( $\text{CDCl}_3$ , 100 MHz)  $\delta$  20.4, 20.5, 21.51, 21.54, 112.3, 113.8, 115.7, 120.6, 120.7, 123.4, 123.5, 123.8, 124.1, 124.55, 124.64, 124.7, 125.8, 126.8, 126.9, 127.9, 129.1, 129.3, 129.6, 129.9, 130.1, 130.5, 130.7, 130.9, 131.9, 132.1, 134.9, 135.2, 135.6, 136.8, 137.3, 139.3, 140.3, 144.6, 144.9 (1 carbon is missing due to overlapping). EIMS (**2**)  $m/z$  361 ( $\text{M}^+$ ), 222, 206, 178, 151, 128, 115, 101, 91, 77, 65, 51. EIMS (**3**)  $m/z$  361 ( $\text{M}^+$ ), 206, 178, 152, 128, 115, 103, 91, 77, 65, 51. HREIMS  $m/z$  361.1138 ( $\text{M}^+$ ), calcd for  $\text{C}_{22}\text{H}_{19}\text{NO}_2\text{S}$  361.1136.

Spectral data of **2** were consistent with data reported in the literature.<sup>1</sup>

### *N*-Ts-2-(4-Chlorophenyl)indole (**2d**) & *N*-Ts-3-(4-Chlorophenyl)indole (**3d**)

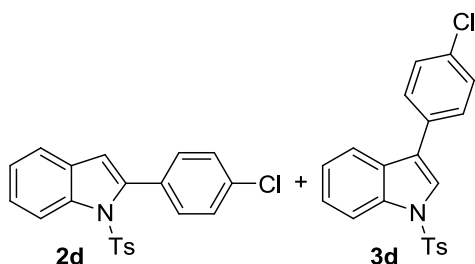

85% (**2d** : **3d** = 1 : 0.6), an orange solid (EtOAc : *n*-Hexane = 1 : 7).

$^1\text{H}$  NMR ( $\text{CDCl}_3$ , 400 MHz)  $\delta$  2.29 (s, 3H of **2d**), 2.35 (s, 3H of **3d**), 6.55 (s, 1H of **2d**), 7.05 (d,  $J = 8.0$  Hz, 2H of **2d**), 7.23-7.32 (m, 3H of **2d** & 1H of **3d**), 7.36-7.46 (m, 6H of **2d** & 5H of **3d**), 7.54 (d,  $J = 8.0$  Hz, 2H of **3d**), 7.70 (s, 1H of **3d**), 7.72 (d,  $J = 8.4$  Hz, 1H of **3d**), 7.82 (d,  $J = 7.6$  Hz, 2H of **3d**), 8.06 (d,  $J = 8.4$  Hz, 1H of **3d**), 8.31 (d,  $J = 8.8$  Hz, 1H of **2d**).  $^{13}\text{C}$  NMR ( $\text{CDCl}_3$ , 100 MHz)  $\delta$  21.5, 21.6, 113.9, 114.0, 116.7, 120.1, 120.8, 122.7, 123.0, 123.6, 124.4, 125.0, 126.7, 126.9, 127.8, 128.9, 129.1, 129.3, 130.0, 130.4, 130.9, 131.45, 131.54, 133.4, 134.5, 134.7, 135.1, 135.4,

138.3, 140.8, 144.7, 145.1 (2 carbons are missing due to overlapping). EIMS (**2d**)  $m/z$  381 ( $M^+$ ), 242, 226, 199, 190, 164, 155, 139, 113, 91, 75, 65, 51. EIMS (**3d**)  $m/z$  381 ( $M^+$ ), 226, 199, 190, 163, 155, 137, 113, 91, 65, 51. HREIMS  $m/z$  381.0588 ( $M^+$ ), calcd for  $C_{21}H_{16}ClNO_2S$  381.0590. Spectral data of **2d** were consistent with data reported in the literature.<sup>1</sup>

### ***N*-Ts-2-(4-Nitrophenyl)indole (2e)**

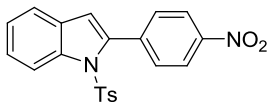

91%, a yellow solid (EtOAc : *n*-Hexane = 1 : 7), mp 170-171 °C.

<sup>1</sup>H NMR (CDCl<sub>3</sub>, 400 MHz)  $\delta$  2.29 (s, 3H), 6.69 (s, 1H), 7.06 (d,  $J$  = 8.0 Hz, 2H), 7.25 (d,  $J$  = 8.0 Hz, 2H), 7.30 (t,  $J$  = 7.6 Hz, 1H), 7.42 (t,  $J$  = 7.8 Hz, 1H), 7.47 (d,  $J$  = 7.6 Hz, 1H), 7.71 (d,  $J$  = 8.8 Hz, 2H), 8.30 (d,  $J$  = 8.8 Hz, 3H). <sup>13</sup>C NMR (CDCl<sub>3</sub>, 100 MHz)  $\delta$  21.5, 116.1, 116.8, 121.2, 122.8, 124.8, 125.8, 126.6, 129.4, 130.3, 130.6, 133.8, 138.7, 138.9, 139.6, 145.0, 147.5. EIMS  $m/z$  392 ( $M^+$ ), 253, 237, 190, 178, 164, 155, 140, 91, 65.

Spectral data were consistent with data reported in the literature.<sup>1, 7</sup>

### ***N*-Ts-2-(3-(Trifluoromethyl)phenyl)indole**

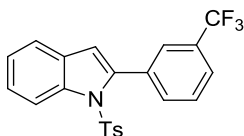

90%, an orange solid (EtOAc : *n*-Hexane = 1 : 7), mp 55-60 °C.

<sup>1</sup>H NMR (CDCl<sub>3</sub>, 400 MHz)  $\delta$  2.29 (s, 3H), 6.60 (s, 1H), 7.04 (d,  $J$  = 7.6 Hz, 2H), 7.22 (d,  $J$  = 8.4 Hz, 2H), 7.29 (t,  $J$  = 7.4 Hz, 1H), 7.39 (t,  $J$  = 8.0 Hz, 1H), 7.47 (d,  $J$  = 8.0 Hz, 1H), 7.56 (t,  $J$  = 7.8 Hz, 1H), 7.60 (s, 1H), 7.68 (d,  $J$  = 7.6 Hz, 1H), 7.76 (d,  $J$  = 7.2 Hz, 1H), 8.33 (d,  $J$  = 8.0 Hz, 1H). <sup>13</sup>C NMR (CDCl<sub>3</sub>, 100 MHz)  $\delta$  21.5, 114.3, 116.6, 120.9, 124.0 (q,  $J$  = 270.9 Hz), 124.5, 125.25 (q,  $J$  = 3.7 Hz), 125.29, 126.6, 126.7 (q,  $J$  = 3.7 Hz), 127.9, 129.3, 130.0 (q,  $J$  = 32.0 Hz), 130.2, 133.1, 134.0, 134.5, 138.4, 140.2, 144.9. EIMS  $m/z$  415 ( $M^+$ ), 396, 350, 335, 276, 260, 240, 233, 220, 190, 165, 155, 139, 91, 65, 51. HREIMS  $m/z$  415.0853 ( $M^+$ ), calcd for  $C_{22}H_{16}F_3NO_2S$  415.0854.

Spectral data were consistent with data reported in the literature.<sup>1</sup>

### **Methyl *N*-Ts-Indole-2-carboxylate (2f)**

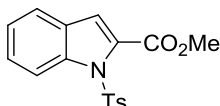

60%, a yellow solid (EtOAc : *n*-Hexane = 1 : 3), mp 52-54 °C.

<sup>1</sup>H NMR (CDCl<sub>3</sub>, 400 MHz)  $\delta$  2.37 (s, 3H), 3.94 (s, 3H), 7.16 (s, 1H), 7.26 (d,  $J$  = 8.4 Hz, 2H), 7.28 (t,  $J$  = 8.4 Hz, 1H), 7.44 (t,  $J$  = 7.8 Hz, 1H), 7.56 (d,  $J$  = 8.0 Hz, 1H), 7.91 (d,  $J$  = 7.6 Hz, 2H), 8.13

<sup>7</sup> Kurisaki, T.; Naniwa, T.; Yamamoto, T.; Imagawa, H.; Nishizawa, M. *Tetrahedron Lett.* **2007**, *48*, 1871.

(d,  $J = 8.4$  Hz, 1H).  $^{13}\text{C}$  NMR ( $\text{CDCl}_3$ , 100 MHz)  $\delta$  21.6, 52.7, 115.4, 116.8, 122.5, 124.0, 127.0, 127.4, 128.1, 129.5, 131.4, 135.7, 138.2, 144.9, 161.8. EIMS  $m/z$  329 ( $\text{M}^+$ ), 265, 155, 143, 139, 115, 91, 89, 65, 51.

Spectral data were consistent with data reported in the literature.<sup>8</sup>

### ***N*-Ts-2-*n*-Hexylindole (2g)**

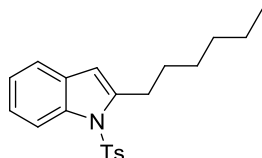

20%, a yellow solid (EtOAc : *n*-Hexane = 1 : 6), mp 73-74 °C.

$^1\text{H}$  NMR ( $\text{CDCl}_3$ , 400 MHz)  $\delta$  0.90 (m, 3H), 1.32 (m, 4H), 1.41 (m, 2H), 1.74 (quintet,  $J = 7.5$  Hz, 2H), 2.33 (s, 3H), 2.97 (t,  $J = 7.6$  Hz, 2H), 6.38 (s, 1H), 7.18 (d,  $J = 8.4$  Hz, 2H), 7.21 (t,  $J = 6.4$  Hz, 1H), 7.25 (t,  $J = 7.2$  Hz, 1H), 7.40 (d,  $J = 7.2$  Hz, 1H), 7.61 (d,  $J = 8.0$  Hz, 2H), 8.16 (d,  $J = 8.0$  Hz, 1H).  $^{13}\text{C}$  NMR ( $\text{CDCl}_3$ , 100 MHz)  $\delta$  14.1, 21.5, 22.6, 28.8, 28.97, 29.02, 31.6, 108.5, 114.8, 120.0, 123.4, 123.7, 126.2, 129.7, 129.8, 136.2, 137.1, 142.5, 144.5. EIMS  $m/z$  355 ( $\text{M}^+$ ), 285, 221, 200, 170, 156, 143, 130, 118, 103, 91, 77, 65, 55.

Spectral data were consistent with data reported in the literature.<sup>1, 9</sup>

### ***N*-Ts-5-Methyl-2-phenylindole (2h) & *N*-Ts-5-Methyl-3-phenylindole (3h)**

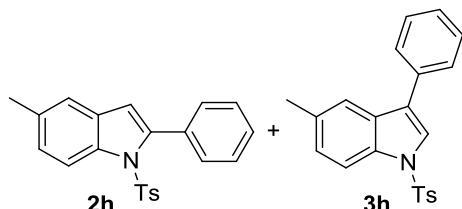

85% (**2h** : **3h** = 1 : 0.5), a white solid (EtOAc : *n*-Hexane = 1 : 7).

$^1\text{H}$  NMR ( $\text{CDCl}_3$ , 400 MHz)  $\delta$  2.28 (s, 3H of **2h**), 2.34 (s, 3H of **3h**), 2.41 (s, 3H of **2h**), 2.43 (s, 3H of **3h**), 6.47 (s, 1H of **2h**), 7.04 (d,  $J = 8.0$  Hz, 2H of **2h**), 7.16-7.32 (m, 4H of **2h** & 3H of **3h**), 7.35-7.51 (m, 5H of **2h** & 3H of **3h**), 7.55 (s, 1H of **3h**), 7.59 (d,  $J = 7.6$  Hz, 2H of **3h**), 7.65 (s, 1H of **3h**), 7.79 (d,  $J = 8.0$  Hz, 2H of **3h**), 7.93 (d,  $J = 8.8$  Hz, 1H of **3h**), 8.18 (d,  $J = 8.4$  Hz, 1H of **2h**).  $^{13}\text{C}$  NMR ( $\text{CDCl}_3$ , 100 MHz)  $\delta$  21.3, 21.4, 21.50, 21.54, 113.5, 113.6, 116.4, 120.2, 120.6, 123.1, 123.8, 126.1, 126.3, 126.78, 126.83, 127.4, 127.9, 128.5, 128.9, 129.1, 129.3, 129.5, 129.9, 130.2, 130.8, 131.4, 132.5, 133.2, 133.8, 133.9, 134.6, 135.2, 136.5, 142.2, 144.4, 144.9. EIMS (**2h**)  $m/z$  361 ( $\text{M}^+$ ), 222, 206, 179, 152, 128, 102, 91, 77, 65, 51. EIMS (**3h**)  $m/z$  361 ( $\text{M}^+$ ), 281, 206, 178, 152, 128, 102, 91, 77, 65, 51.

<sup>8</sup> (a) Blessley, G.; Holden, P.; Walker, M.; Brown, J. M.; Gouverneur, V. *Org. Lett.* **2012**, *14*, 2754. (b) Karadeolian, A.; Kerr, M. A. *J. Org. Chem.* **2010**, *75*, 6830. (c) Vieira, T. O.; Meaney, L. A.; Shi, Y.-L.; Alper, H. *Org. Lett.* **2008**, *10*, 4899.

<sup>9</sup> Yamagishi, M.; Nishigai, K.; Ishii, A.; Hata, T.; Urabe, H. *Angew. Chem. Int. Ed.* **2012**, *51*, 6471.

Spectral data of **2h** were consistent with data reported in the literature.<sup>1, 3, 5</sup>

### ***N*-Ts-5-Chloro-2-phenylindole (2) & *N*-Ts-5-Chloro-3-phenylindole (3)**

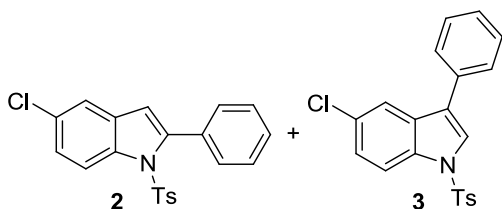

91% (**2** : **3** = 1 : 2), a pale yellow solid (EtOAc : *n*-Hexane = 1 : 7).

<sup>1</sup>H NMR (CDCl<sub>3</sub>, 400 MHz) δ 2.30 (s, 3H of **2**), 2.35 (s, 3H of **3**), 6.48 (s, 1H of **2**), 7.06 (d, *J* = 8.4 Hz, 2H of **2**), 7.24 (d, *J* = 9.2 Hz, each 2H of **2** & **3**), 7.29-7.33 (m, each 1H of **2** & **3**), 7.37-7.49 (m, 6H of **2** & 3H of **3**), 7.55 (d, *J* = 7.6 Hz, 2H of **3**), 7.70 (s, 1H of **3**), 7.73 (d, *J* = 1.6 Hz, 1H of **3**), 7.78 (d, *J* = 8.4 Hz, 2H of **3**), 7.98 (d, *J* = 8.8 Hz, 1H of **3**), 8.23 (d, *J* = 8.8 Hz, 1H of **2**). <sup>13</sup>C NMR (CDCl<sub>3</sub>, 100 MHz) δ 21.5, 21.6, 112.6, 114.9, 117.7, 120.1, 120.2, 123.5, 124.2, 124.9, 125.1, 126.75, 126.84, 127.5, 127.8, 128.95, 129.03, 129.3, 129.6, 130.0, 130.3, 130.5, 131.7, 131.8, 132.4, 133.8, 134.4, 134.9, 136.5, 143.5, 144.8, 145.3 (2 carbons are missing due to overlapping). EIMS (**2**) *m/z* 381(M<sup>+</sup>), 242, 226, 199, 190, 164, 155, 139, 123, 91, 73, 65, 51. EIMS (**3**) *m/z* 381(M<sup>+</sup>), 226, 199, 190, 163, 155, 139, 126, 91, 65, 51.

Spectral data of **2**<sup>1, 3</sup> and **3**<sup>10</sup> were consistent with data reported in the literature.

### ***N*-Ts-5-Nitro-2-phenylindole (2i) & *N*-Ts-5-Nitro-3-phenylindole (3i)**

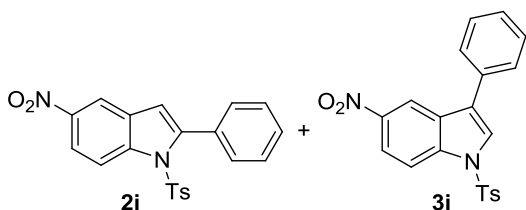

90% (**2i** : **3i** = 1 : 3.8), a yellow oil (EtOAc : *n*-Hexane = 1 : 7).

<sup>1</sup>H NMR (CDCl<sub>3</sub>, 400 MHz) δ 2.32 (s, 3H of **2i**), 2.38 (s, 3H of **3i**), 6.65 (s, 1H of **2i**), 7.09 (d, *J* = 8.4 Hz, 2H of **2i**), 7.29 (d, *J* = 8.4 Hz, each 2H of **2i** & **3i**), 7.42-7.45 (m, 5H of **2i** & 1H of **3i**), 7.52 (t, *J* = 7.4 Hz, 2H of **3i**), 7.58 (d, *J* = 7.6 Hz, 2H of **3i**), 7.837 (s, 1H of **3i**), 7.838 (d, *J* = 8.0 Hz, 2H of **3i**), 8.15 (d, *J* = 8.8 Hz, 1H of **3i**), 8.24 (dd, *J* = 2.0, 6.8 Hz, 1H of **2i**), 8.26 (dd, *J* = 2.0, 7.2 Hz, 1H of **3i**), 8.38 (d, *J* = 2.0 Hz, 1H of **2i**), 8.44 (d, *J* = 9.2 Hz, 1H of **2i**), 8.68 (d, *J* = 1.6 Hz, 1H of **3i**). <sup>13</sup>C NMR (CDCl<sub>3</sub>, 100 MHz) δ 21.58, 21.64, 112.7, 114.0, 116.5, 116.8, 117.0, 119.7, 120.1, 124.6, 125.4, 126.8, 127.0, 127.6, 127.9, 128.3, 129.3, 129.4, 129.6, 130.3, 130.5, 131.1, 131.5, 134.6, 138.2, 141.0, 144.5, 144.7, 144.9, 145.5, 146.0 (3 carbons are missing due to overlapping). EIMS (**2i**) *m/z* 392 (M<sup>+</sup>), 237, 207, 179, 155, 139, 127, 91, 77, 65, 51. EIMS (**3i**) *m/z* 392 (M<sup>+</sup>), 237, 207, 191, 164, 155, 139, 91, 77, 65, 51.

Spectral data of **2i** were consistent with data reported in the literature.<sup>1, 3</sup>

<sup>10</sup> Miyagi, T.; Hari, Y.; Aoyama, T. *Tetrahedron Lett.* **2004**, *45*, 6303.

***N*-Ts-6-Methyl-2-phenylindole (2), *N*-Ts-6-Methyl-3-phenylindole (3), & *N*-Ts-3-Chloro-6-methyl-2-phenylindole (Cl-2)**

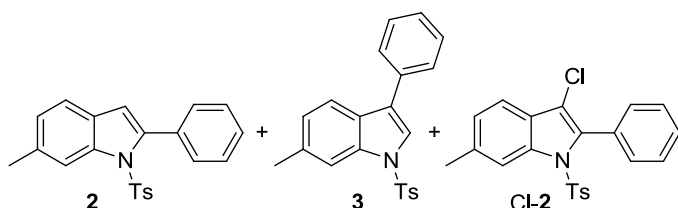

89% (**2** : **3** : Cl-**2** = 1 : 0.3 : 0.1), a pale yellow solid (EtOAc : *n*-Hexane = 1 : 7).

<sup>1</sup>H NMR (CDCl<sub>3</sub>, 400 MHz) δ 2.29 (s, 3H of **2**), 2.32 (s, 3H of Cl-**2**), 2.35 (s, 3H of **3**), 2.51 (s, 3H of **3**), 2.53 (s, 3H of **2**), 2.56 (s, 3H of Cl-**2**), 6.49 (s, 1H of **2**), 7.03-7.12 (m, each 2H of **3** & Cl-**2**), 7.04 (d, *J* = 8.0 Hz, 2H of **2**), 7.09 (d, *J* = 7.6 Hz, 1H of **2**), 7.20-7.49 (m, 4H of **3** & 9H of Cl-**2**), 7.27 (d, *J* = 8.0 Hz, 2H of **2**), 7.32 (d, *J* = 7.6 Hz, 1H of **2**), 7.41-7.49 (m, 5H of **2**), 7.60 (d, *J* = 7.6 Hz, 2H of **3**), 7.63 (s, 1H of **3**), 7.65 (d, *J* = 8.0 Hz, 1H of **3**), 7.80 (d, *J* = 8.0 Hz, 2H of **3**), 7.87 (s, 1H of **3**), 8.13 (s, 1H of **2**), 8.17 (s, 1H of Cl-**2**). <sup>13</sup>C NMR (CDCl<sub>3</sub>, 100 MHz) δ 21.5, 21.6, 21.9, 22.1, 113.6, 113.9, 114.9, 116.6, 116.8, 117.6, 118.3, 120.0, 120.2, 120.6, 121.2, 122.3, 123.9, 125.1, 125.7, 126.2, 126.77, 126.83, 127.0, 127.4, 127.8, 128.3, 128.5, 128.9, 129.1, 129.4, 129.9, 130.2, 131.4, 132.6, 133.2, 133.6, 134.7, 134.9, 135.1, 135.3, 135.9, 138.7, 141.4, 144.1, 144.4, 144.9 (8 carbons are missing due to overlapping). EIMS (**2**) *m/z* 361 (M<sup>+</sup>), 222, 206, 179, 152, 128, 102, 91, 77, 65, 51. EIMS (**3**) *m/z* 361 (M<sup>+</sup>), 222, 206, 178, 152, 128, 102, 91, 77, 65, 51. EIMS (Cl-**2**) *m/z* 395 (M<sup>+</sup>), 361, 281, 240, 213, 204, 178, 151, 139, 102, 91, 65, 51. HREIMS *m/z* 361.1138 (M)<sup>+</sup>, calcd for C<sub>22</sub>H<sub>19</sub>NO<sub>2</sub>S 361.1136.

Spectral data of **2** were consistent with data reported in the literature.<sup>1</sup>

***N*-Ts-6-Chloro-2-phenylindole (2j) & *N*-Ts-6-Chloro-3-phenylindole (3j)**

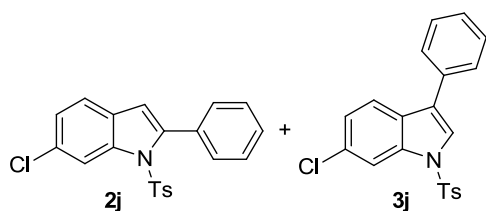

98% (**2j** : **3j** = 1 : 0.8), a pink solid (EtOAc : *n*-Hexane = 1 : 7).

<sup>1</sup>H NMR (CDCl<sub>3</sub>, 400 MHz) δ 2.31 (s, 3H of **2j**), 2.37 (s, 3H of **3j**), 6.50 (s, 1H of **2j**), 7.07 (d, *J* = 7.6 Hz, 2H of **2j**), 7.27 (d, *J* = 6.8 Hz, 3H of **2j** & 2H of **3j**), 7.36 (d, *J* = 8.0 Hz, 1H of **2j**), 7.38-7.48 (m, 5H of **2j** & 4H of **3j**), 7.56 (d, *J* = 7.2 Hz, 2H of **3j**), 7.67 (s, 1H of **3j**), 7.68 (d, *J* = 7.6 Hz, 1H of **3j**), 7.81 (d, *J* = 8.4 Hz, 2H of **3j**), 8.08 (d, *J* = 0.8 Hz, 1H of **3j**), 8.35 (s, 1H of **2j**). <sup>13</sup>C NMR (CDCl<sub>3</sub>, 100 MHz) δ 21.55, 21.61, 112.8, 114.0, 116.7, 121.2, 121.3, 123.3, 123.7, 124.2, 124.9, 126.8, 126.9, 127.5, 127.76, 127.81, 128.9, 129.0, 129.3, 130.1, 130.4, 130.6, 130.9, 131.8, 132.5, 134.5, 134.9, 135.8, 138.5, 142.6, 144.9, 145.4 (2 carbons are missing due to overlapping). EIMS (**2j**) *m/z* 381 (M<sup>+</sup>), 226, 199, 190, 164, 155, 123, 113, 91, 73, 65, 51. EIMS (**3j**) *m/z* 381 (M<sup>+</sup>), 226, 199, 190, 163, 155, 91, 65, 51.



Spectral data of **2j** were consistent with data reported in the literature.<sup>1, 11</sup>

### ***N*-Ts-6-Nitro-2-phenylindole (2k) & *N*-Ts-6-Nitro-3-phenylindole (3k)**

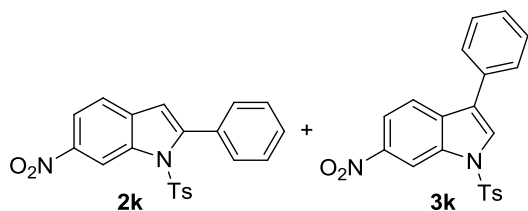

82% (**2k** : **3k** = 1 : 1.1), a dark brown solid (EtOAc : *n*-Hexane = 1 : 7).

<sup>1</sup>H NMR (CDCl<sub>3</sub>, 400 MHz) δ 2.32 (s, 3H of **2k**), 2.38 (s, 3H of **3k**), 6.62 (s, 1H of **2k**), 7.09 (d, *J* = 8.4 Hz, 2H of **2k**), 7.28-7.31 (m, each 2H of **2k** & **3k**), 7.42-7.52 (m, 5H of **2k** & 3H of **3k**), 7.55 (d, *J* = 8.4 Hz, 1H of **2k**), 7.57 (d, *J* = 6.4 Hz, 2H of **3k**), 7.86 (d, *J* = 8.4 Hz, 1H of **3k**), 7.87 (d, *J* = 7.6 Hz, 2H of **3k**), 7.94 (s, 1H of **3k**), 8.18 (d, *J* = 9.2 Hz, each 1H of **2k** & **3k**), 8.96 (s, 1H of **3k**), 9.25 (s, 1H of **2k**). <sup>13</sup>C NMR (CDCl<sub>3</sub>, 100 MHz) δ 21.57, 21.64, 110.2, 112.3, 112.8, 118.7, 119.6, 120.6, 120.7, 123.8, 126.9, 127.1, 127.6, 127.7, 127.9, 128.2, 129.2, 129.57, 129.59, 130.3, 130.5, 131.1, 131.7, 133.8, 134.2, 134.4, 134.5, 135.0, 136.9, 145.0, 145.2, 145.4, 146.0, 147.2. EIMS (**2k**) *m/z* 392 (M<sup>+</sup>), 281, 253, 237, 207, 190, 179, 163, 155, 139, 91, 77, 65, 51. EIMS (**3k**) *m/z* 392 (M<sup>+</sup>), 282, 252, 237, 207, 190, 179, 163, 155, 139, 126, 91, 65, 51. HREIMS *m/z* 392.0832 (M)<sup>+</sup>, calcd for C<sub>21</sub>H<sub>16</sub>N<sub>2</sub>O<sub>4</sub>S 392.0831.

Spectral data of **2k** were consistent with data reported in the literature.<sup>1</sup>

### ***N*-Ts-3-(4-Methoxyphenyl)-2-(4-(trifluoromethyl)phenyl)indole (3l)**

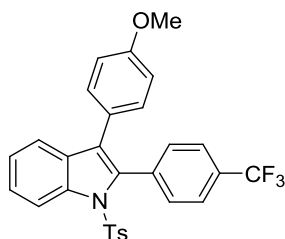

78%, a greenish solid (EtOAc : *n*-Hexane = 1 : 8), mp 140-142 °C. *E/Z* mixture of **1l** (3:1) was used and recovered in 8% yield with a 1:1 ratio.

<sup>1</sup>H NMR (CDCl<sub>3</sub>, 400 MHz) δ 2.31 (s, 3H), 3.77 (s, 3H), 6.78 (d, *J* = 8.4 Hz, 2H), 6.97 (d, *J* = 8.8 Hz, 2H), 7.08 (d, *J* = 8.0 Hz, 2H), 7.29 (t, *J* = 8.0 Hz, 1H), 7.30 (d, *J* = 8.4 Hz, 2H), 7.39 (d, *J* = 8.4 Hz, 2H), 7.43 (t, *J* = 7.6 Hz, 1H), 7.45 (d, *J* = 7.6 Hz, 1H), 7.54 (d, *J* = 8.0 Hz, 2H), 8.39 (d, *J* = 8.4 Hz, 1H). <sup>13</sup>C NMR (CDCl<sub>3</sub>, 100 MHz) δ 21.5, 55.1, 113.9, 116.3, 120.2, 124.079 (q, *J* = 270.6 Hz), 124.082, 124.2 (q, *J* = 3.7 Hz), 124.4, 125.6, 125.9, 126.8, 129.4, 130.1 (q, *J* = 32.3 Hz), 130.7, 130.9, 132.2, 134.7, 134.9, 135.0, 137.4, 144.8, 158.8. HREIMS *m/z* 544.1165 (M+Na)<sup>+</sup>, calcd for C<sub>29</sub>H<sub>22</sub>F<sub>3</sub>NNaO<sub>3</sub>S 544.1165.

### ***N*-Ts-3-*p*-Tolyl-2-(4-(trifluoromethyl)phenyl)indole (3m)**

<sup>11</sup> Inamoto, K.; Asano, N; Nakamura, Y.; Yonemoto, M.; Kondo, Y. *Org. Lett.* **2012**, *14*, 2622.

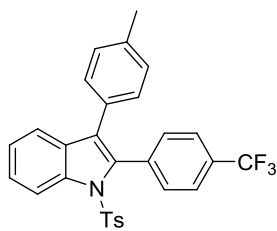

47%, a yellow solid (EtOAc : *n*-Hexane = 1 : 6). *E/Z* mixture of **1m** (2.3:1) was used and recovered in 51% yield with a 1.1:1 ratio.

$^1\text{H}$  NMR ( $\text{CDCl}_3$ , 400 MHz)  $\delta$  2.31 (s, 3H), 2.32 (s, 3H), 6.93 (d,  $J = 8.0$  Hz, 2H), 7.06 (d,  $J = 8.4$  Hz, 2H), 7.08 (d,  $J = 8.4$  Hz, 2H), 7.29 (t,  $J = 7.2$  Hz, 1H), 7.30 (d,  $J = 8.4$  Hz, 2H), 7.39 (d,  $J = 8.4$  Hz, 2H), 7.43 (t,  $J = 8.4$  Hz, 1H), 7.45 (d,  $J = 7.6$  Hz, 1H), 7.54 (d,  $J = 8.0$  Hz, 2H), 8.39 (d,  $J = 8.4$  Hz, 1H).  $^{13}\text{C}$  NMR ( $\text{CDCl}_3$ , 100 MHz)  $\delta$  21.2, 21.6, 116.4, 120.3, 124.1 (q,  $J = 270.6$  Hz), 124.2 (q,  $J = 3.7$  Hz), 124.4, 125.6, 126.1, 126.8, 128.9, 129.1, 129.4, 129.6, 130.1 (q,  $J = 32.2$  Hz), 130.6, 132.2, 134.86, 134.91, 137.1, 137.5, 144.8 (1 carbon is missing due to overlapping). HREIMS  $m/z$  528.1215 ( $\text{M}+\text{Na}$ ) $^+$ , calcd for  $\text{C}_{29}\text{H}_{22}\text{F}_3\text{NNaO}_2\text{S}$  528.1216.

### *N*-Ts-3-Phenyl-2-(4-(trifluoromethyl)phenyl)indole (**3n**) & *N*-Ts-2-Phenylindole (**2a**)

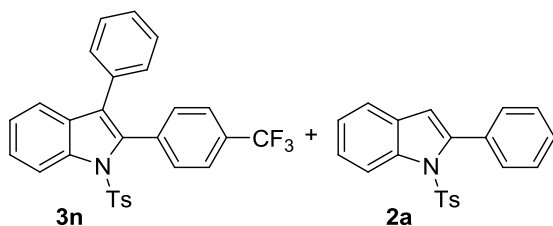

42% (**3n** : **2a** = 1 : 0.1), a yellow solid (EtOAc : *n*-Hexane = 1 : 7). *E/Z* mixture of **1n** (1.7:1) was used and recovered in 53% yield with a 1.4:1 ratio.

$^1\text{H}$  NMR ( $\text{CDCl}_3$ , 400 MHz)  $\delta$  2.28 (s, 3H of **2a**), 2.32 (s, 3H of **3n**), 6.54 (s, 1H of **2a**), 7.04-7.06 (m, 2H of **3n** & 2H of **2a**), 7.09 (d,  $J = 8.0$  Hz, 2H of **3n**), 7.20-7.34 (m, 6H of **3n** & 4H of **2a**), 7.38 (d,  $J = 8.0$  Hz, 2H of **3n**), 7.42-7.49 (m, 2H of **3n** & 6H of **2a**), 7.53 (d,  $J = 8.0$  Hz, 2H of **3n**), 8.31 (d,  $J = 8.4$  Hz, 1H of **2a**), 8.40 (d,  $J = 8.8$  Hz, 1H of **3n**).  $^{13}\text{C}$  NMR ( $\text{CDCl}_3$ , 100 MHz)  $\delta$  21.5, 21.6, 113.6, 116.4, 116.6, 120.2, 120.7, 124.1 (q,  $J = 271.3$  Hz), 124.2 (q,  $J = 3.7$  Hz), 124.5, 124.7, 125.7, 126.1, 126.8, 126.9, 127.3, 127.5, 128.4, 128.6, 129.2, 129.4, 129.8, 130.2 (q,  $J = 32.2$  Hz), 130.3, 130.45, 130.53, 132.0, 132.2, 132.4, 134.6, 134.8, 134.9, 135.1, 137.4, 138.2, 142.1, 144.5, 144.9 (1 carbon is missing due to overlapping). EIMS (**3n**)  $m/z$  491 ( $\text{M}^+$ ), 336, 267, 239, 163, 155, 134, 91, 65, 51. EIMS (**2a**)  $m/z$  347 ( $\text{M}^+$ ), 208, 192, 165, 139, 115, 91, 65. HREIMS  $m/z$  491.1168 ( $\text{M}$ ) $^+$ , calcd for  $\text{C}_{28}\text{H}_{20}\text{F}_3\text{NO}_2\text{S}$  491.1167.

Spectral data of **3n** and **2a** were consistent with data reported in the literature.<sup>1</sup>

### *N*-Ts-2,3-Diphenylindole

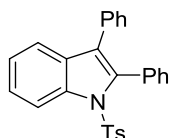

73%, a pale yellow solid (EtOAc : *n*-Hexane = 1 : 5), mp 173-175 °C. Unreacted starting material was recovered in 22% yield.

<sup>1</sup>H NMR (CDCl<sub>3</sub>, 400 MHz) δ 2.32 (s, 3H), 7.07-7.09 (m, 4H), 7.20-7.31 (m, 9H), 7.34 (d, *J* = 8.0 Hz, 2H), 7.42 (t, *J* = 7.6 Hz, 1H), 7.49 (d, *J* = 7.6 Hz, 1H), 8.41 (d, *J* = 8.4 Hz, 1H). <sup>13</sup>C NMR (CDCl<sub>3</sub>, 100 MHz) δ 21.5, 116.2, 119.9, 124.1, 124.7, 125.1, 126.9, 127.2, 128.1, 128.4, 129.3, 129.8, 130.4, 130.8, 132.0, 132.6, 135.2, 136.8, 137.2, 144.5 (1 carbon is missing due to overlapping). EIMS *m/z* 423 (M<sup>+</sup>), 268, 239, 213, 190, 165, 134, 120, 91, 65, 51.

Spectral data were consistent with data reported in the literature.<sup>1, 12</sup>

### ***N*-Ts-2-Methyl-3-phenylindole (3o)**

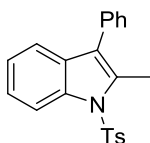

64%, a yellow oil (EtOAc : *n*-Hexane = 1 : 6). Unreacted **1o** was recovered in 23% yield.

<sup>1</sup>H NMR (CDCl<sub>3</sub>, 400 MHz) δ 2.36 (s, 3H), 2.60 (s, 3H), 7.22-7.24 (m, 1H), 7.23 (d, *J* = 7.6 Hz, 2H), 7.30-7.38 (m, 4H), 7.41-7.47 (m, 3H), 7.73 (d, *J* = 8.0 Hz, 2H), 8.27 (d, *J* = 8.8 Hz, 1H). <sup>13</sup>C NMR (CDCl<sub>3</sub>, 100 MHz) δ 13.5, 21.6, 114.5, 119.2, 122.5, 123.5, 124.2, 126.4, 127.3, 128.5, 129.9, 130.0, 133.05, 133.10, 136.2, 136.3, 144.7 (1 carbon is missing due to overlapping). EIMS *m/z* 361 (M<sup>+</sup>), 206, 178, 165, 152, 128, 115, 91, 77, 65, 51.

Spectral data were consistent with data reported in the literature.<sup>1, 13</sup>

### ***N*-Ts-7,8-Dihydro-6*H*-benzo[6,7]oxepino[4,5-*b*]indole (3p)**

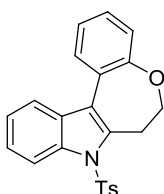

51%, a yellow solid (EtOAc : *n*-Hexane = 1 : 7), mp 109-110 °C.

<sup>1</sup>H NMR (CDCl<sub>3</sub>, 400 MHz) δ 2.34 (s, 3H), 3.60 (t, *J* = 6.2 Hz, 2H), 4.44 (t, *J* = 6.0 Hz, 2H), 7.13 (d, *J* = 7.6 Hz, 1H), 7.21 (d, *J* = 8.4 Hz, 2H), 7.20-7.26 (m, 2H), 7.29 (t, *J* = 7.6 Hz, 1H), 7.35 (t, *J* = 7.4 Hz, 1H), 7.67 (d, *J* = 8.4 Hz, 2H), 7.87-7.89 (m, 2H), 8.32 (d, *J* = 8.4 Hz, 1H). <sup>13</sup>C NMR (CDCl<sub>3</sub>, 100 MHz) δ 21.5, 30.5, 73.4, 114.9, 118.2, 120.0, 121.4, 123.5, 123.7, 124.6, 125.6, 126.3, 127.9, 128.6, 129.6, 130.0, 135.6, 136.1, 137.0, 145.0, 158.9. EIMS *m/z* 389 (M<sup>+</sup>), 307, 281, 267, 234, 207, 204, 165, 152, 133, 102, 96, 91, 73, 65, 55. HREIMS *m/z* 389.1087 (M)<sup>+</sup>, calcd for C<sub>23</sub>H<sub>19</sub>NO<sub>3</sub>S 389.1086.

Spectral data were consistent with data reported in the literature.<sup>1</sup>

<sup>12</sup> Larock, R. C.; Yum, E. K.; Refvik, M. D. *J. Org. Chem.* **1998**, *63*, 7652.

<sup>13</sup> (a) Zhu, C.; Ma, S. *Org. Lett.* **2013**, *15*, 2782. (b) McAusland, D.; Seo, S.; Pintori, D. G.; Finlayson, J.; Greaney, M. F. *Org. Lett.* **2011**, *13*, 3667.

### *N*-Ts-Spiro(chroman-4,2'-indoline) (**4**)

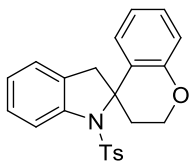

31%, a yellow solid (EtOAc : *n*-Hexane = 1 : 7), mp 168-170 °C.

<sup>1</sup>H NMR (CDCl<sub>3</sub>, 400 MHz)  $\delta$  2.07 (d,  $J$  = 13.2 Hz, 1H), 2.38 (s, 3H), 3.27 (d,  $J$  = 16.0 Hz, 1H), 3.29 (td,  $J$  = 4.0, 12.6 Hz, 1H), 3.54 (d,  $J$  = 16.0 Hz, 1H), 4.21 (td,  $J$  = 1.9, 11.6 Hz, 1H), 4.21 (dt,  $J$  = 3.8, 11.3 Hz, 1H), 6.72 (t,  $J$  = 7.2 Hz, 1H), 6.87 (d,  $J$  = 7.6 Hz, 1H), 7.01 (t,  $J$  = 7.6 Hz, 1H), 7.05 (d,  $J$  = 7.2 Hz, 1H), 7.12 (d,  $J$  = 7.6 Hz, 1H), 7.15 (t,  $J$  = 8.8 Hz, 1H), 7.19 (d,  $J$  = 8.4 Hz, 2H), 7.23 (t,  $J$  = 8.4 Hz, 1H), 7.56 (d,  $J$  = 8.0 Hz, 1H), 7.61 (d,  $J$  = 8.0 Hz, 2H). <sup>13</sup>C NMR (CDCl<sub>3</sub>, 100 MHz)  $\delta$  21.5, 35.0, 48.6, 64.1, 69.3, 113.8, 117.2, 120.6, 123.0, 125.1, 126.3, 126.9, 127.0, 127.1, 128.1, 128.9, 129.4, 138.4, 142.4, 143.6, 154.3. EIMS  $m/z$  391 (M<sup>+</sup>), 355, 326, 254, 236, 220, 180, 165, 152, 143, 131, 91, 65, 51. HREIMS  $m/z$  414.1133 (M+Na)<sup>+</sup>, calcd for C<sub>23</sub>H<sub>21</sub>NNaO<sub>3</sub>S 414.1140.

### General Procedure for the Preparation of 2,3-Disubstituted *N*-Ts-Indoles **3** & **3'**

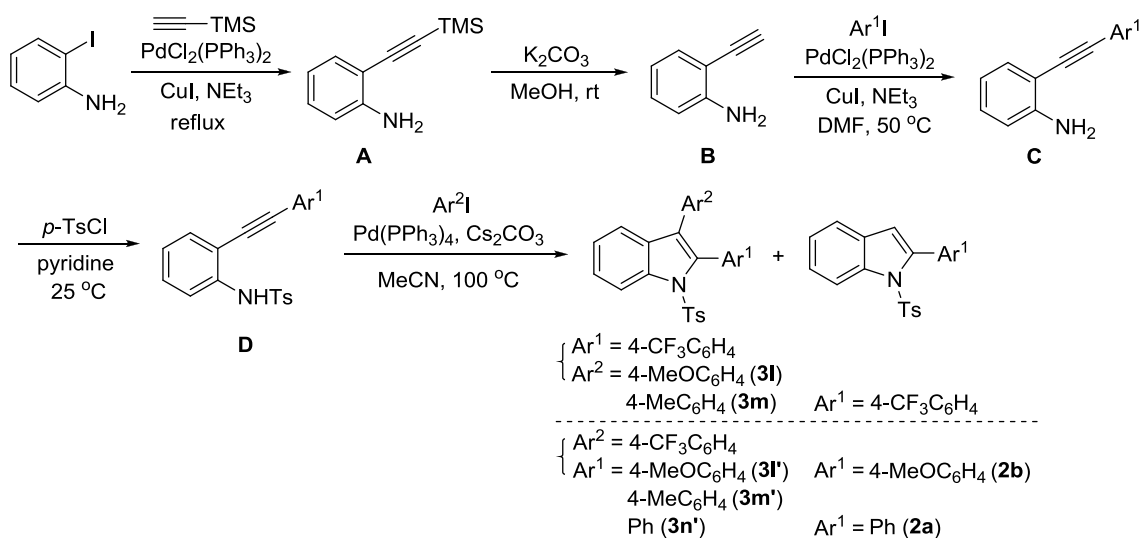

Authentic samples of 2-aryl-3-aryl'-substituted indoles (**3** and **3'**) were prepared as follows<sup>14</sup> and the products from our protocol were identified by comparison with <sup>1</sup>H & <sup>13</sup>C NMR spectra of each corresponding isomer.

To a solution of 2-iodoaniline (800.4 mg, 3.654 mmol) was dissolved in mixed ethynyltrimethylsilane (607  $\mu$ L, 4.385 mmol, 1.2 equiv), PdCl<sub>2</sub>(PPh<sub>3</sub>)<sub>2</sub> (256.5 mg, 0.365 mmol, 10 mol%), CuI (69.6 mg, 0.365 mmol, 10 mol%) and Et<sub>3</sub>N (28.1 mL, 0.13 M) were added. The

<sup>14</sup> Cacchi, S.; Fabrizi, G.; Lamba, D.; Marinelli, F.; Parisi, L. M. *Synthesis* **2003**, 728.

reaction mixture was stirred at reflux for 3 h. The reaction mixture was diluted with water and extracted with CH<sub>2</sub>Cl<sub>2</sub> (3 times). The resulting organic phase was washed with brine and dried over MgSO<sub>4</sub>. The resulting mixture was filtered, and the filtrate was concentrated *in vacuo*. The residue was purified by column chromatography on silica gel (EtOAc : *n*-Hexane = 1:20) to give the corresponding product **A** (520.8 mg, 75 %) as a yellow oil.

To a solution of **A** (520.8 mg, 2.751 mmol, 1 equiv) in MeOH (13.8 mL, 0.2 M) was added K<sub>2</sub>CO<sub>3</sub> (760.4 mg, 5.502 mmol, 2 equiv). After being stirred at room temperature for 16 h, the reaction mixture was poured into water and then the product was extracted with CH<sub>2</sub>Cl<sub>2</sub> (3 times). The combined organic layer was washed with brine, dried over MgSO<sub>4</sub>, and concentrated *in vacuo*. The residue was purified by column chromatography on silica gel (EtOAc : *n*-Hexane = 1:10) to afford the corresponding product **B** (315.6 mg, 98%) as a yellow oil.

To a solution of **B** (1 equiv) in DMF (0.25 M) were added Ar<sup>1</sup>I (1equiv), PdCl<sub>2</sub>(PPh<sub>3</sub>)<sub>2</sub> (1 mol%), CuI (1 mol%), and Et<sub>3</sub>N (8 equiv). After being stirred at 50 °C for 8-12 h, the reaction mixture was poured into water and then the product was extracted with CH<sub>2</sub>Cl<sub>2</sub> (three times). The combined organic layer was washed with brine, dried over MgSO<sub>4</sub>, and concentrated *in vacuo*. The residue was purified by column chromatography on silica gel to afford the corresponding product **C**.

To a solution of **C** (1 equiv) in pyridine (0.2 M) was added *p*-TsCl (1.1 equiv) at 0 °C. After being stirred at 25 °C for 2 hours, the reaction mixture was poured into water and then the product was extracted with CH<sub>2</sub>Cl<sub>2</sub> (three times), dried over MgSO<sub>4</sub>, and concentrated *in vacuo*. The residue was purified by column chromatography on silica gel to give the corresponding product **D**.

To a solution of **D** (1 equiv) in MeCN (0.13 M) were added subsequently Cs<sub>2</sub>CO<sub>3</sub> (2.2 equiv), Pd(PPh<sub>3</sub>)<sub>4</sub> (5 mol%), and Ar<sup>2</sup>I (2.2 equiv). After being stirred at 100 °C for 1 h, the reaction mixture was cooled to room temperature. The reaction mixture was poured into water and then the product was extracted with CH<sub>2</sub>Cl<sub>2</sub> (three times), dried over MgSO<sub>4</sub>, and concentrated *in vacuo*. The residue was purified by column chromatography on silica gel to give the corresponding product **3** or **3'** (or the mixture of **3** or **3'** and **2**).

### ***N*-Ts-3-(4-Methoxyphenyl)-2-(4-(trifluoromethyl)phenyl)indole (3I)**

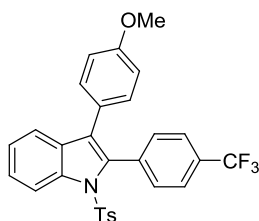

a white solid (EtOAc : *n*-Hexane = 1 : 8).

<sup>1</sup>H NMR (CDCl<sub>3</sub>, 400 MHz) δ 2.32 (s, 3H), 3.77 (s, 3H), 6.79 (d, *J* = 8.4 Hz, 2H), 6.97 (d, *J* = 8.8 Hz, 2H), 7.08 (d, *J* = 7.6 Hz, 2H), 7.30 (t, *J* = 7.2 Hz, 1H), 7.31 (d, *J* = 8.0 Hz, 2H), 7.39 (d, *J* = 8.4 Hz, 2H), 7.41 (t, *J* = 7.6 Hz, 1H), 7.45 (d, *J* = 7.6 Hz, 1H), 7.54 (d, *J* = 8.0 Hz, 2H), 8.39 (d, *J* = 8.0 Hz, 1H). <sup>13</sup>C NMR (CDCl<sub>3</sub>, 100 MHz) δ 21.5, 55.2, 113.9, 116.4, 120.2, 124.09, 124.10 (q, *J* = 270.6 Hz), 124.2 (q, *J* = 3.7 Hz), 124.4, 125.6, 125.9, 126.8, 129.4, 130.1 (q, *J* = 32.2 Hz), 130.7,

130.9, 132.2, 134.7, 134.9, 135.0, 137.4, 144.8, 158.8. HREIMS  $m/z$  544.1163 ( $M+Na$ )<sup>+</sup>, calcd for C<sub>29</sub>H<sub>22</sub>F<sub>3</sub>NNaO<sub>3</sub>S 544.1165.

***N*-Ts-2-(4-Methoxyphenyl)-3-(4-(trifluoromethyl)phenyl)indole (31') & *N*-Ts-2-(4-Methoxyphenyl)indole (2b)**

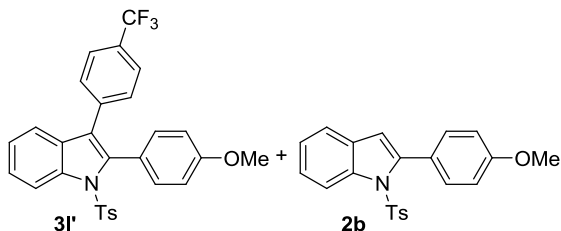

**31' : 2b** = 9.6 : 1, a white solid (EtOAc : *n*-Hexane = 1 : 5).

<sup>1</sup>H NMR (CDCl<sub>3</sub>, 400 MHz)  $\delta$  2.28 (s, 3H of **2b**), 2.32 (s, 3H of **31'**), 3.85 (s, 3H of **31'**), 3.89 (s, 3H of **2b**), 6.48 (s, 1H of **2b**), 6.82 (d,  $J$  = 8.4 Hz, 2H of **31'**), 6.95 (d,  $J$  = 8.4 Hz, 2H of **2b**), 7.03 (d,  $J$  = 7.6 Hz, 2H of **2b**), 7.09 (d,  $J$  = 8.0 Hz, 2H of **31'**), 7.12 (d,  $J$  = 8.4 Hz, 2H of **31'**), 7.20-7.50 (m, 7H of **2b**), 7.21 (d,  $J$  = 8.4 Hz, 2H of **31'**), 7.30 (t,  $J$  = 7.6 Hz, 1H of **31'**), 7.33 (d,  $J$  = 8.0 Hz, 2H of **31'**), 7.43 (t,  $J$  = 7.6 Hz, 1H of **31'**), 7.44 (d,  $J$  = 8.8 Hz, 1H of **31'**), 7.48 (d,  $J$  = 8.8 Hz, 2H of **31'**), 8.30 (d,  $J$  = 8.0 Hz, 1H of **2b**), 8.42 (d,  $J$  = 8.0 Hz, 1H of **31'**). <sup>13</sup>C NMR (CDCl<sub>3</sub>, 100 MHz)  $\delta$  21.5, 21.6, 55.2, 55.3, 112.9, 113.0, 116.3, 116.7, 119.4, 120.5, 122.3, 122.8, 124.1 (q,  $J$  = 270.6 Hz), 124.2, 124.3, 124.5, 125.1 (q,  $J$  = 3.7 Hz), 125.3, 126.8, 126.9, 128.7 (q,  $J$  = 32.3 Hz), 129.1, 129.2, 129.3, 129.7, 130.0, 130.6, 131.6, 133.4, 135.4, 136.9, 137.1, 137.5, 144.5, 144.7, 160.0. (5 carbons are missing due to overlapping). HREIMS (**31'**)  $m/z$  544.1163 ( $M+Na$ )<sup>+</sup>, calcd for C<sub>29</sub>H<sub>22</sub>F<sub>3</sub>NNaO<sub>3</sub>S 544.1165. HREIMS (**2b**)  $m/z$  400.0983 ( $M+Na$ )<sup>+</sup>, calcd for C<sub>22</sub>H<sub>19</sub>NNaO<sub>3</sub>S 400.0978.

***N*-Ts-3-*p*-Tolyl-2-(4-(trifluoromethyl)phenyl)indole (3m) & *N*-Ts-2-(4-(Trifluoromethyl)phenyl)indole (2)**

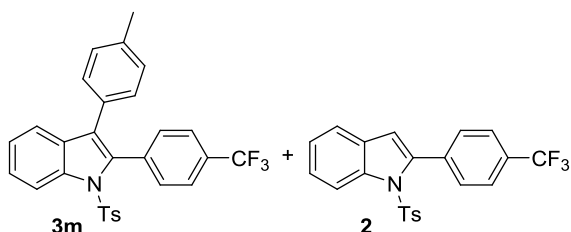

**3m : 2** = 1 : 0.3, a beige solid (CH<sub>2</sub>Cl<sub>2</sub> : *n*-Hexane = 1 : 1).

<sup>1</sup>H NMR (CDCl<sub>3</sub>, 400 MHz)  $\delta$  2.28 (s, 3H of **2**), 2.30 (s, 3H of **3m**), 2.31 (s, 3H of **3m**), 6.60 (s, 1H of **2**), 6.93 (d,  $J$  = 8.0 Hz, 2H of **3m**), 7.05 (d,  $J$  = 9.0 Hz, 2H of **3m**), 7.07 (d,  $J$  = 8.8 Hz, 2H of **3m**), 7.04-7.09 (m, 2H of **2**), 7.29 (t,  $J$  = 7.2 Hz, 1H of **3m**), 7.30 (d,  $J$  = 8.4 Hz, 2H of **3m**), 7.24-7.27 (m, 3H of **2**), 7.36-7.40 (m, 2H of **2**), 7.39 (d,  $J$  = 8.0 Hz, 2H of **3m**), 7.43 (t,  $J$  = 8.2 Hz, 1H of **3m**), 7.45 (d,  $J$  = 7.2 Hz, 1H of **3m**), 7.53 (d,  $J$  = 7.6 Hz, 2H of **3m**), 7.63 (d,  $J$  = 8.4 Hz, 2H of **2**), 7.68 (d,  $J$  = 8.8 Hz, 2H of **2**), 8.31 (d,  $J$  = 8.4 Hz, 1H of **2**), 8.39 (d,  $J$  = 8.0 Hz, 1H of **3m**). <sup>13</sup>C NMR (CDCl<sub>3</sub>, 100 MHz)  $\delta$  21.2, 21.49, 21.52, 115.0, 116.3, 116.7, 120.3, 121.0, 124.1 (q,  $J$  = 270.6 Hz), 124.2 (q,  $J$  = 3.7 Hz), 124.4, 124.5 (q,  $J$  = 3.7 Hz), 124.6, 125.4, 125.6, 126.2, 126.7, 126.8, 128.9,

129.1, 129.3, 129.4, 129.6, 130.1 (q,  $J = 32.3$  Hz), 130.37, 130.4 (q,  $J = 33.0$  Hz), 130.6, 132.2, 134.2, 134.87, 134.92, 136.0, 137.1, 137.5, 138.5, 140.4, 144.8 (4 carbons are missing due to overlapping). HREIMS (**3m**)  $m/z$  528.1213 ( $M+Na$ )<sup>+</sup>, calcd for C<sub>29</sub>H<sub>22</sub>F<sub>3</sub>NNaO<sub>2</sub>S 528.1216. HREIMS (**2**)  $m/z$  438.0751 ( $M+Na$ )<sup>+</sup>, calcd for C<sub>22</sub>H<sub>16</sub>F<sub>3</sub>NNaO<sub>2</sub>S 438.0746.

### *N*-Ts-2-*p*-Tolyl-3-(4-(trifluoromethyl)phenyl)indole (**3m'**)

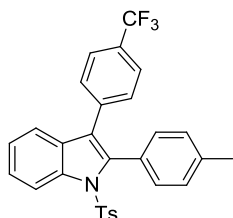

a light yellow solid (CH<sub>2</sub>Cl<sub>2</sub> : *n*-Hexane = 1 : 2), mp 188-190 °C.

<sup>1</sup>H NMR (CDCl<sub>3</sub>, 400 MHz)  $\delta$  2.31 (s, 3H), 2.39 (s, 3H), 7.08 (d,  $J = 8.0$  Hz, 2H), 7.10 (d,  $J = 6.8$  Hz, 4H), 7.21 (d,  $J = 8.0$  Hz, 2H), 7.29 (t,  $J = 7.4$  Hz, 1H), 7.35 (d,  $J = 8.0$  Hz, 2H), 7.42 (t,  $J = 7.6$  Hz, 1H), 7.45 (d,  $J = 8.0$  Hz, 1H), 7.47 (d,  $J = 8.4$  Hz, 2H), 8.42 (d,  $J = 8.4$  Hz, 1H). <sup>13</sup>C NMR (CDCl<sub>3</sub>, 100 MHz)  $\delta$  21.47, 21.54, 116.3, 119.4, 122.9, 124.1 (q,  $J = 271.3$  Hz), 124.3, 125.1 (q,  $J = 3.6$  Hz), 125.3, 126.9, 127.3, 128.3, 128.8 (q,  $J = 32.3$  Hz), 129.3, 129.8, 130.0, 131.8, 135.3, 136.8, 137.1, 137.7, 138.8, 144.7. HREIMS  $m/z$  528.1214 ( $M+Na$ )<sup>+</sup>, calcd for C<sub>29</sub>H<sub>22</sub>F<sub>3</sub>NNaO<sub>2</sub>S 528.1216.

### *N*-Ts-2-Phenyl-3-(4-(trifluoromethyl)phenyl)indole (**3n'**) & *N*-Ts-2-Phenylindole (**2a**)

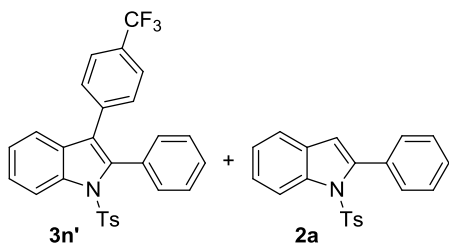

55% (**3n'** : **2a** = 1 : 0.6), a white solid (EtOAc : *n*-Hexane = 1 : 10).

Representative signals corresponding to **3n'**: <sup>1</sup>H NMR (CDCl<sub>3</sub>, 400 MHz)  $\delta$  2.33 (s, 3H), 7.10 (d,  $J = 8.0$  Hz, 2H), 7.20 (d,  $J = 6.4$  Hz, 2H), 7.25 (d,  $J = 7.6$  Hz, 2H), 7.64 (d,  $J = 8.0$  Hz, 1H), 8.45 (d,  $J = 8.4$  Hz, 1H). <sup>13</sup>C NMR (CDCl<sub>3</sub>, 100 MHz)  $\delta$  21.6, 116.2, 119.5, 123.1, 124.3, 125.1 (q,  $J = 3.8$  Hz), 125.4, 126.9, 128.7, 128.8, 129.4, 129.6, 130.1, 132.0, 135.4, 136.7, 137.1, 137.5, 144.8 (3 carbons are missing due to overlapping). EIMS (**3n'**)  $m/z$  491 ( $M^+$ ), 336, 267, 239, 155, 134, 91. EIMS (**2a**)  $m/z$  347 ( $M^+$ ), 208, 192, 165, 139, 115, 91, 65.

Spectral data of **3n'** were consistent with data reported in the literature.<sup>1</sup>

## Mechanistic Studies

### 1) Reaction of **2a** under the Standard Reaction Conditions

To a solution of **2a** (25.0 mg, 0.0715 mmol, 1 equiv) in  $\text{ClCH}_2\text{CH}_2\text{Cl}$  (1.4 mL, 0.05 M) in pressure tube were added  $\text{Pd}(\text{OAc})_2$  (0.8 mg, 0.00358 mmol, 5 mol %) and  $\text{CuCl}_2$  (19.2 mg, 0.143 mmol, 2 equiv). After the resulting mixture was stirred at 150 °C for 24 h, the reaction mixture was concentrated *in vacuo*. The residue was purified by column chromatography on silica gel to afford the mixture of **2a** and Cl-**2a** (25.3 mg, 99%, **2a** and Cl-**2a** = 1:0.3).

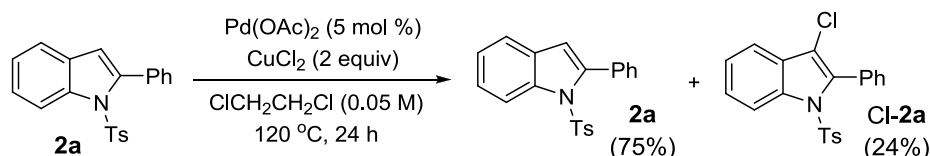

$^1\text{H}$  NMR ( $\text{CDCl}_3$ , 400 MHz)  $\delta$  2.28 (s, 3H of **2a**), 2.31 (s, 3H of Cl-**2a**), 6.54 (s, 1H of **2a**), 7.03 (d,  $J = 7.6$  Hz, 2H of **2a**), 7.07 (d,  $J = 8.0$  Hz, 2H of Cl-**2a**), 7.24-7.28 (m, 1H of **2a** & 2H of Cl-**2a**), 7.27 (d,  $J = 8.4$  Hz, 2H of **2a**), 7.33-7.38 (m, 1H of **2a** & 1H of Cl-**2a**), 7.43-7.53 (m, 6H of **2a** & 7H of Cl-**2a**), 8.31 (d,  $J = 8.4$  Hz, 1H of **2a**), 8.35 (d,  $J = 8.8$  Hz, 1H of Cl-**2a**).  $^{13}\text{C}$  NMR ( $\text{CDCl}_3$ , 100 MHz)  $\delta$  21.5, 21.6, 113.6, 116.4, 116.6, 118.7, 120.7, 124.3, 124.7, 124.8, 126.1, 126.8, 126.9, 127.47, 127.52, 128.6, 129.2, 129.4, 130.3, 130.5, 131.4, 132.4, 134.6, 136.3, 138.2, 142.1, 144.5, 145.0 (6 carbons are missing due to overlapping). EIMS (**2a**)  $m/z$  347 ( $\text{M}^+$ ), 208, 192, 177, 165, 139, 115, 91, 77, 65, 51. EIMS (Cl-**2a**)  $m/z$  381 ( $\text{M}^+$ ), 267, 226, 199, 190, 164, 155, 91, 65, 51.

Spectral data of **2a**<sup>1,3</sup> and Cl-**2a**<sup>15</sup> were consistent with data reported in the literature.

<sup>15</sup> (a) Yamashita, M.; Noro, T.; Iida, A. *Tetrahedron Lett.* **2013**, *54*, 6848. (b) Shen, Z.; Lu, X. *Adv. Synth. Catal.* **2009**, *351*, 3107. (c) Dalton, L.; Humphrey, G. L.; Cooper, M. M.; Joule, J. A. *J. Chem. Soc., Perkin Trans.1:* **1983**, *10*, 2417.



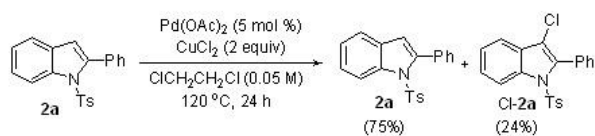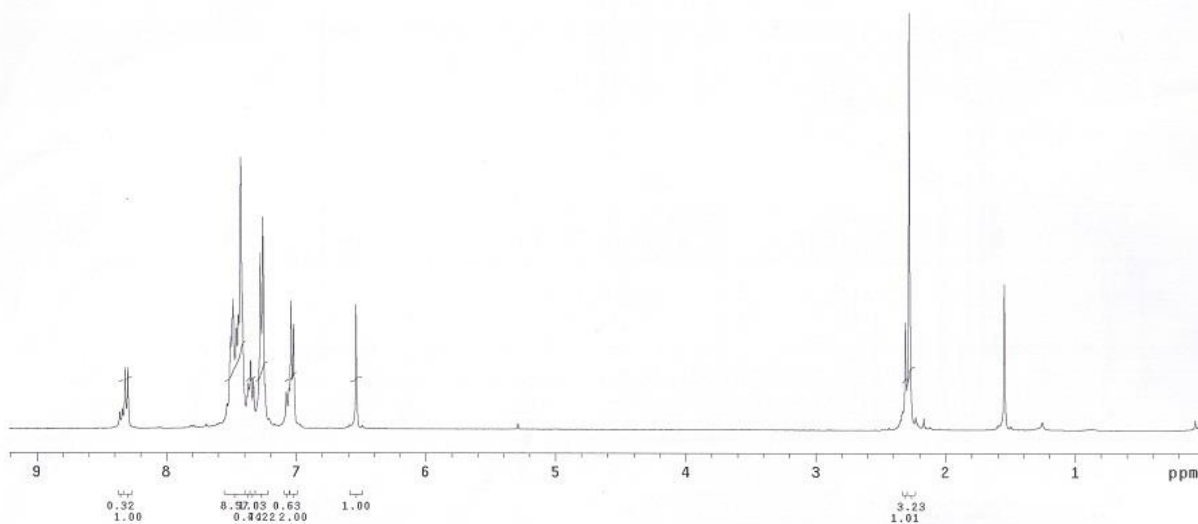

<sup>1</sup>H NMR Spectrum of **2a** & **Cl-2a** Mixture (CDCl<sub>3</sub>, 400 MHz)

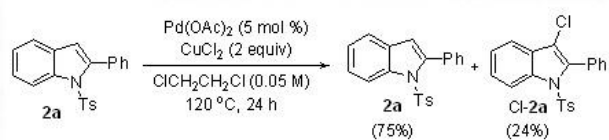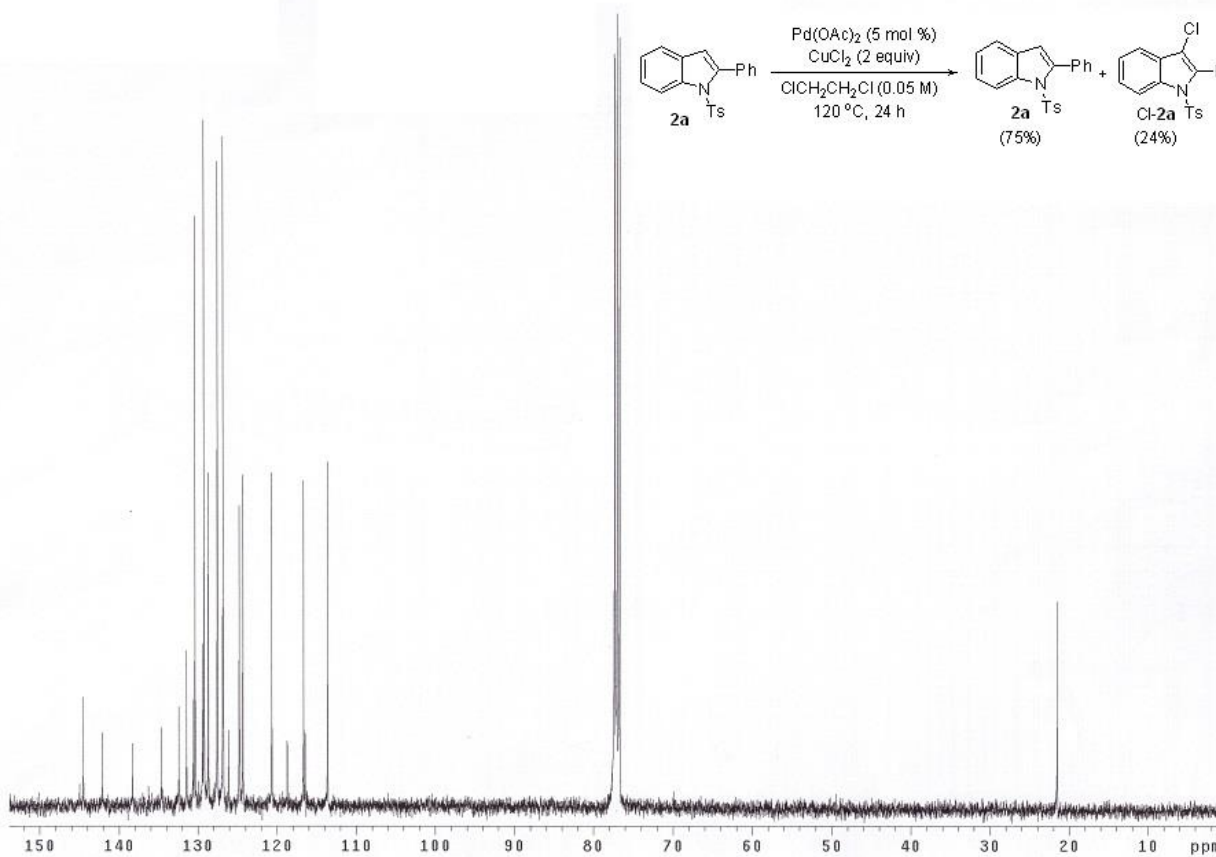

<sup>13</sup>C NMR Spectrum of **2a** & **Cl-2a** Mixture (CDCl<sub>3</sub>, 100 MHz)

## 2) Crossover Experiments

To a solution of **1b** and **1h** (each 0.0361 mmol, 0.5 equiv) in  $\text{ClCH}_2\text{CH}_2\text{Cl}$  (1.4 mL, 0.05 M) in pressure tube were added  $\text{Pd}(\text{OAc})_2$  (0.8 mg, 0.00361 mmol, 5 mol %) and  $\text{CuCl}_2$  (19.4 mg, 0.144 mmol, 2 equiv). After the resulting mixture was stirred at 150 °C for 24 h, the reaction mixture was concentrated *in vacuo*.  $^1\text{H}$  NMR of each crude mixture was taken first and then a few spots observed in TLC were separated by column chromatography on silica gel.  $^1\text{H}$  NMR and GC-MS of each portion were taken to identify the structure of each compound.

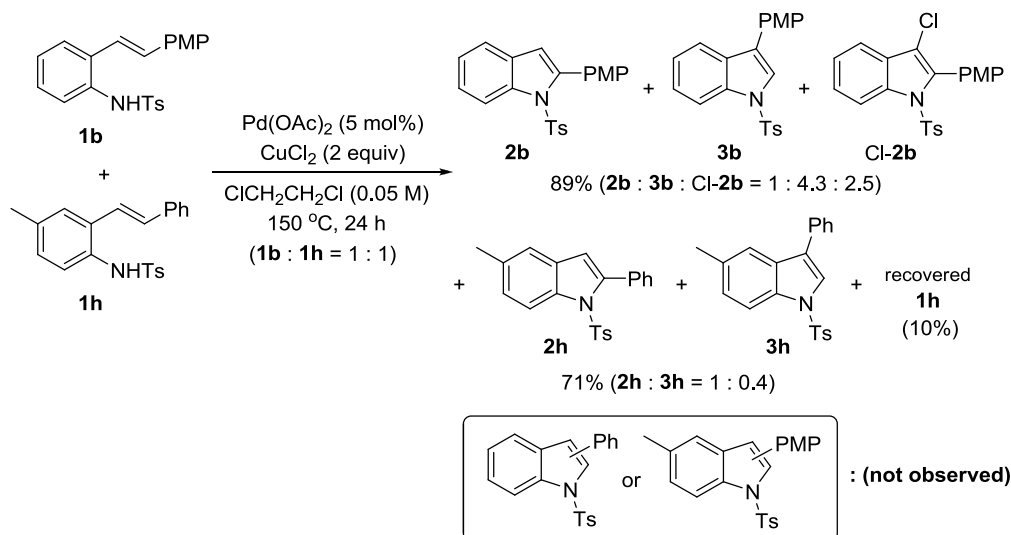

## 3) Addition of Olefins

To a solution of **1n** (26.0 mg, 0.0527 mmol, 1 equiv) in  $\text{ClCH}_2\text{CH}_2\text{Cl}$  (1.1 mL, 0.05 M) in pressure tube were added olefin (0.105 mmol, 2 equiv),  $\text{Pd}(\text{OAc})_2$  (0.6 mg, 0.00264 mmol, 5 mol %), and  $\text{CuCl}_2$  (14.2 mg, 0.105 mmol, 2 equiv). After the resulting mixture was stirred at 150 °C for 24 h, the reaction mixture was concentrated *in vacuo*.  $^1\text{H}$  NMR of each crude mixture was taken first and then a few spots observed in TLC were separated by column chromatography on silica gel.  $^1\text{H}$  NMR and GC-MS of each portion were taken to identify the structure of each compound.

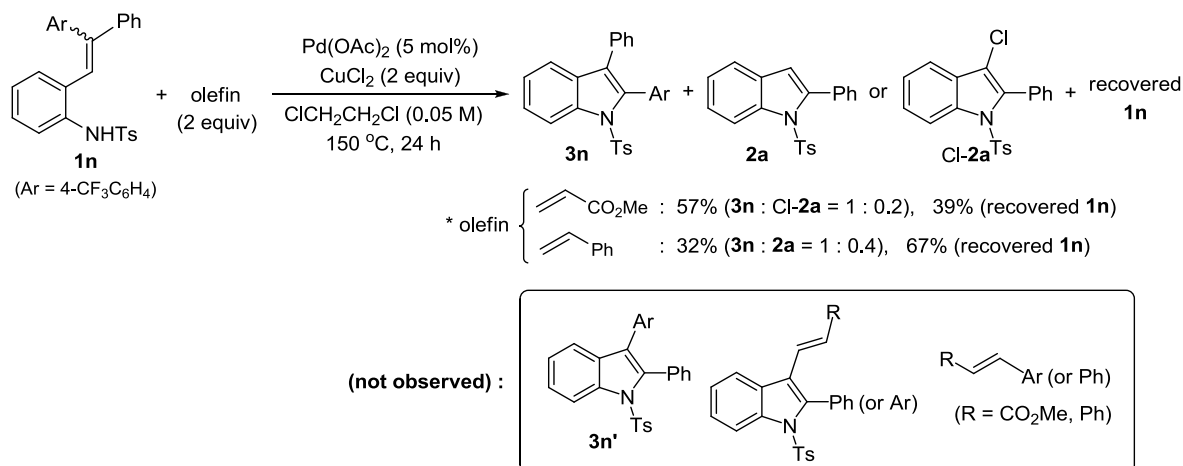

**Proposed Mechanism for the Cu(II)-Mediated Reaction in the Absence of Pd(II) Catalyst (Entries 23-24 in Table S1)**

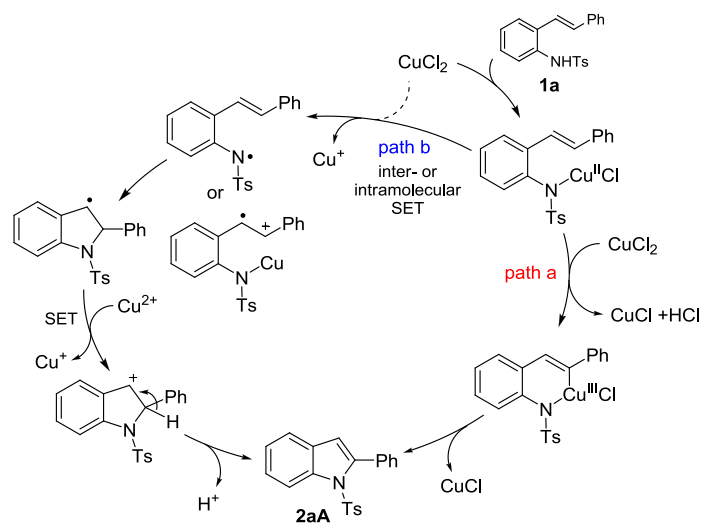

## Copies of NMR Spectra

### (*E*)-Methyl 3-(2-(4-Methylphenylsulfonamido)phenyl)acrylate (**1f**)

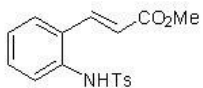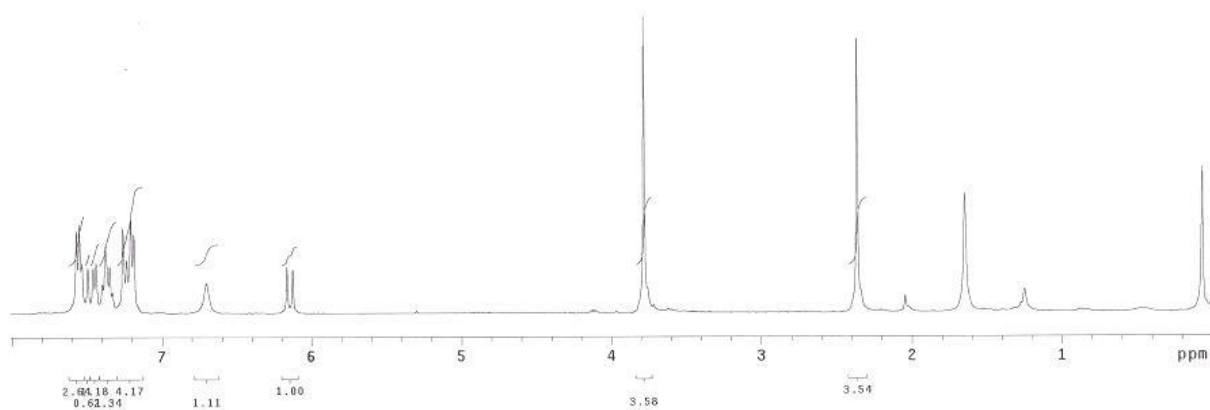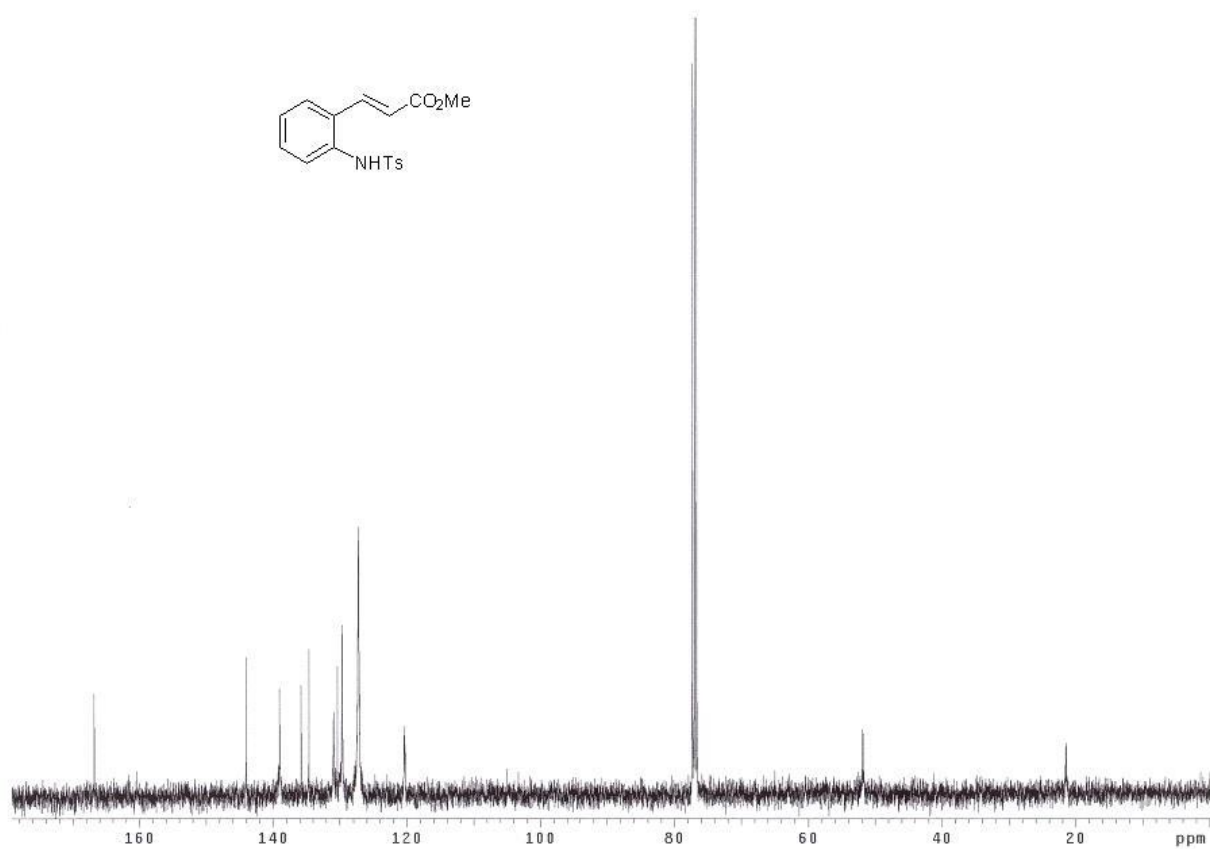

***N*-(2-(2-(4-Methoxyphenyl)-2-(4-(trifluoromethyl)phenyl)vinyl)phenyl)-4-methylbenzenesulfonamide (11)**

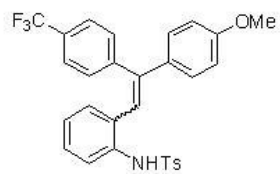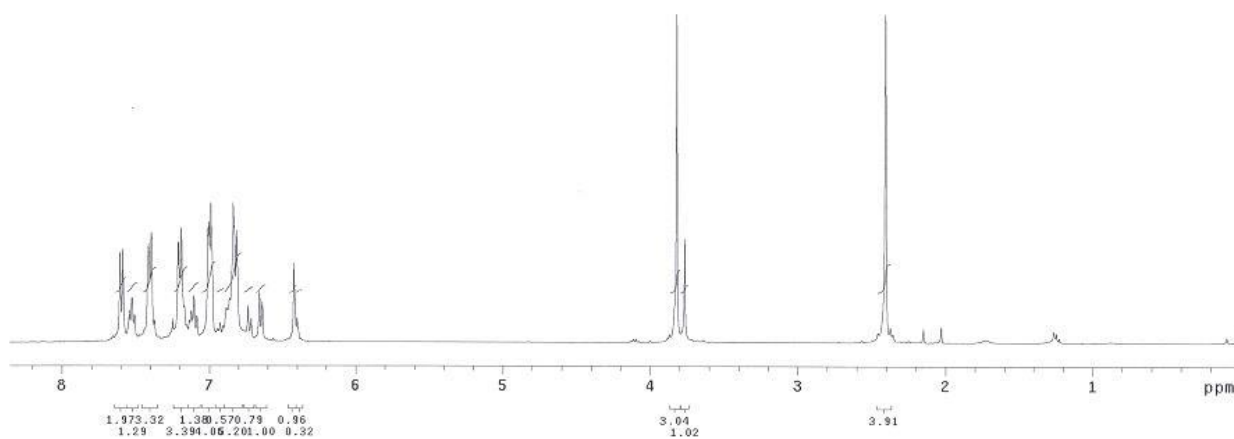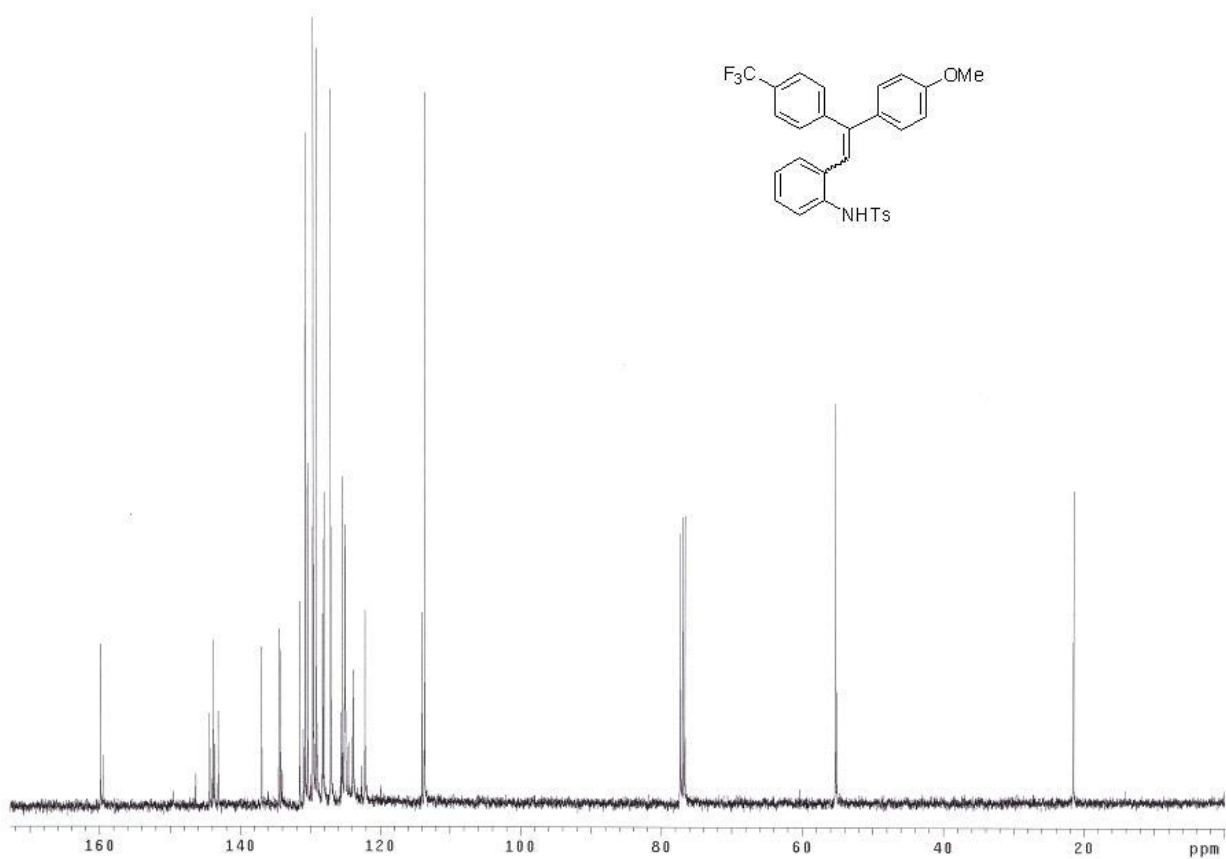

**4-Methyl-N-(2-(2-*p*-tolyl-2-(4-(trifluoromethyl)phenyl)vinyl)phenyl)benzenesulfonamide (1m)**

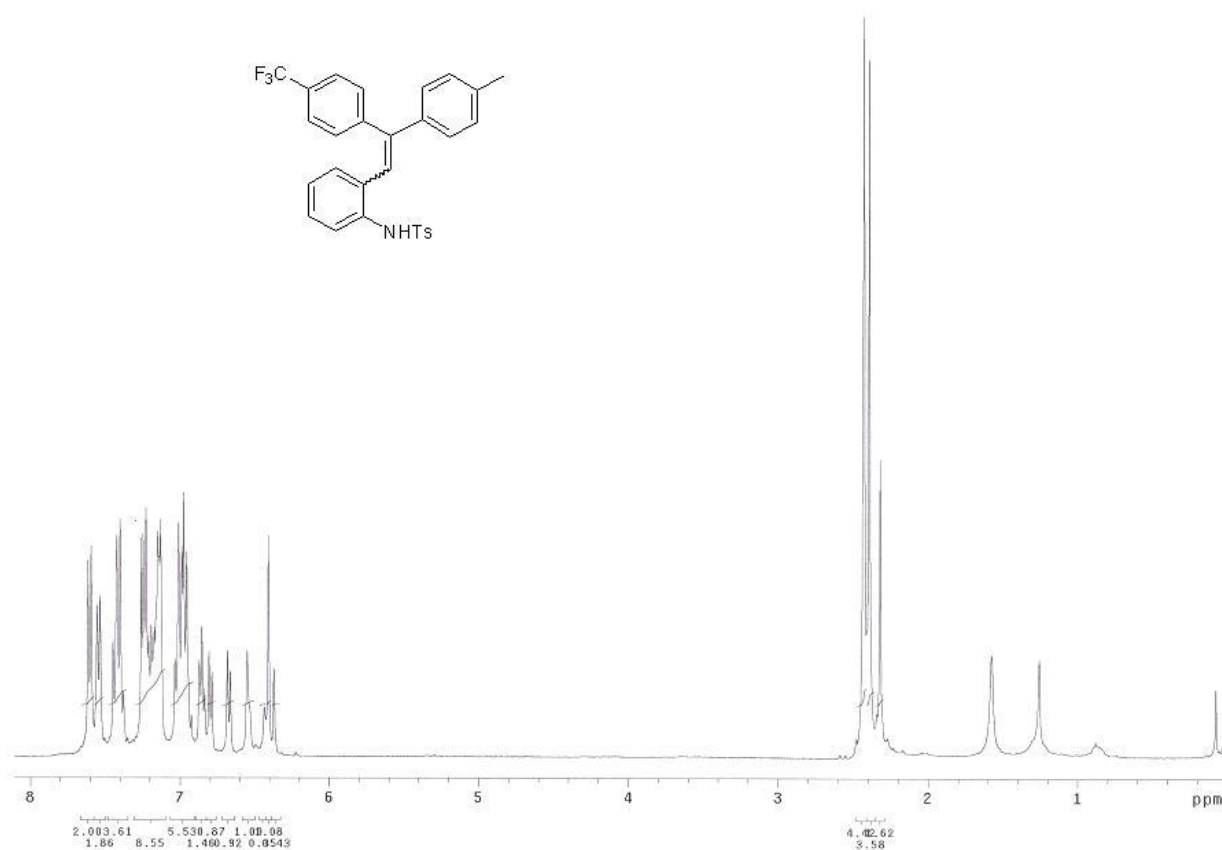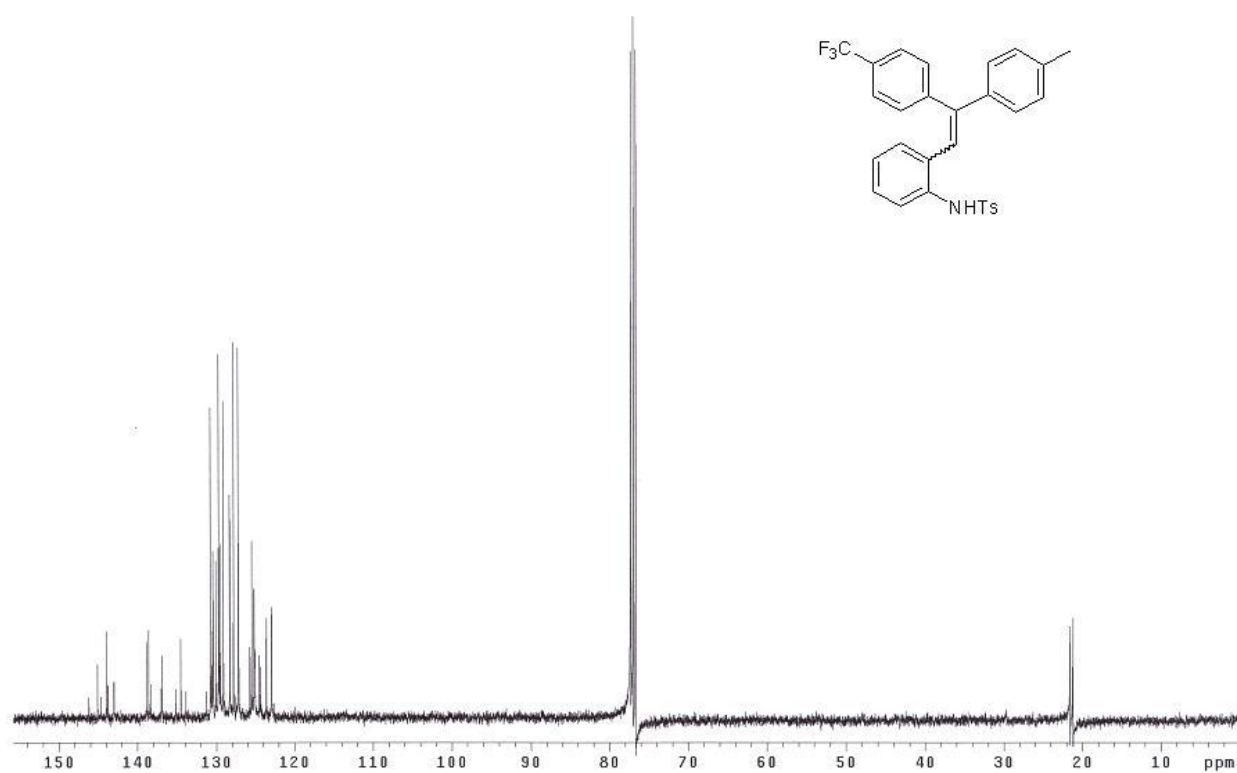

***N*-Ts-2-Phenylindole (2a) & *N*-Ts-3-Phenylindole (3a)**

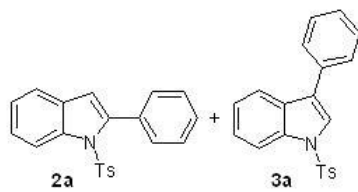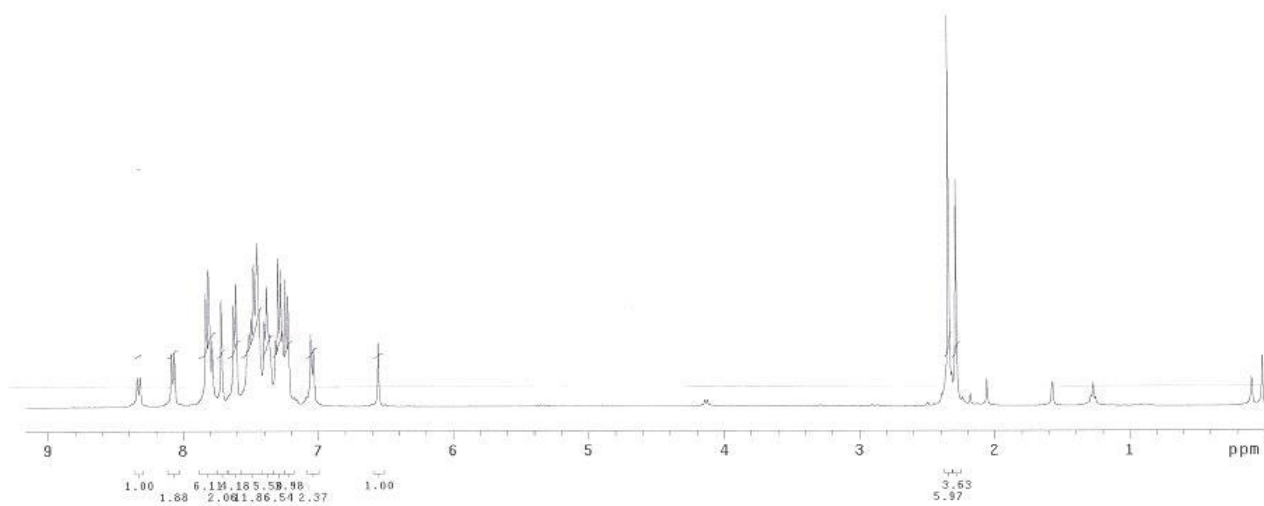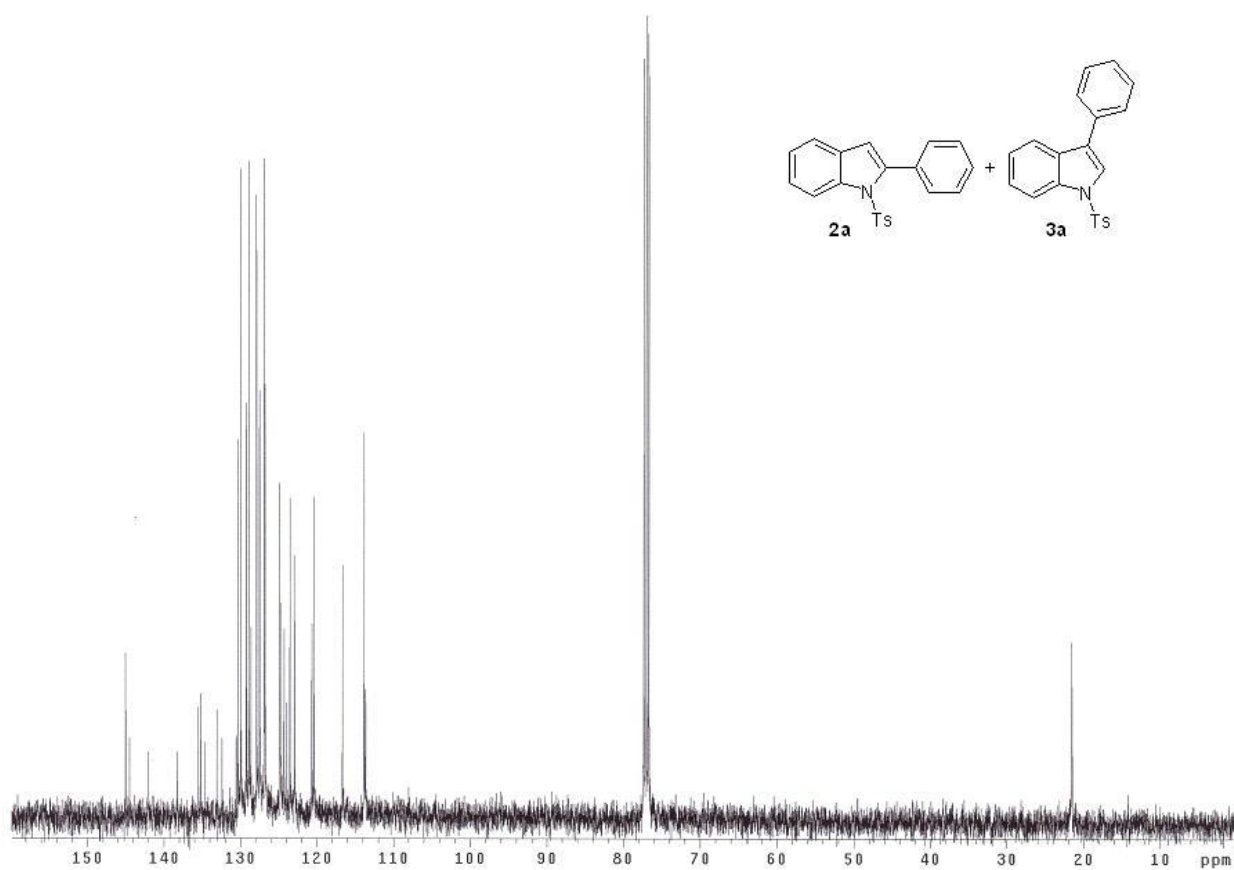

***N*-Ts-2-(4-Methoxyphenyl)indole (2b), *N*-Ts-3-(4-Methoxyphenyl)indole (3b), & *N*-Ts-3-Chloro-2-(4-methoxyphenyl)indole (Cl-2b)**

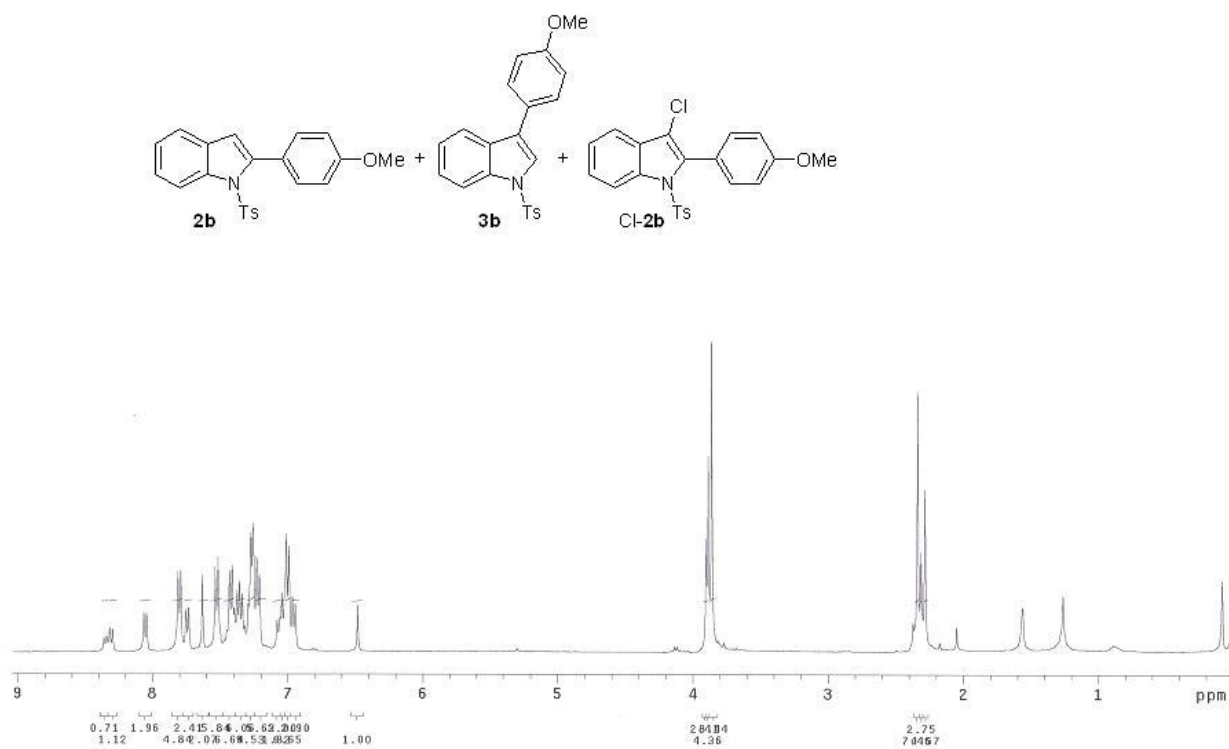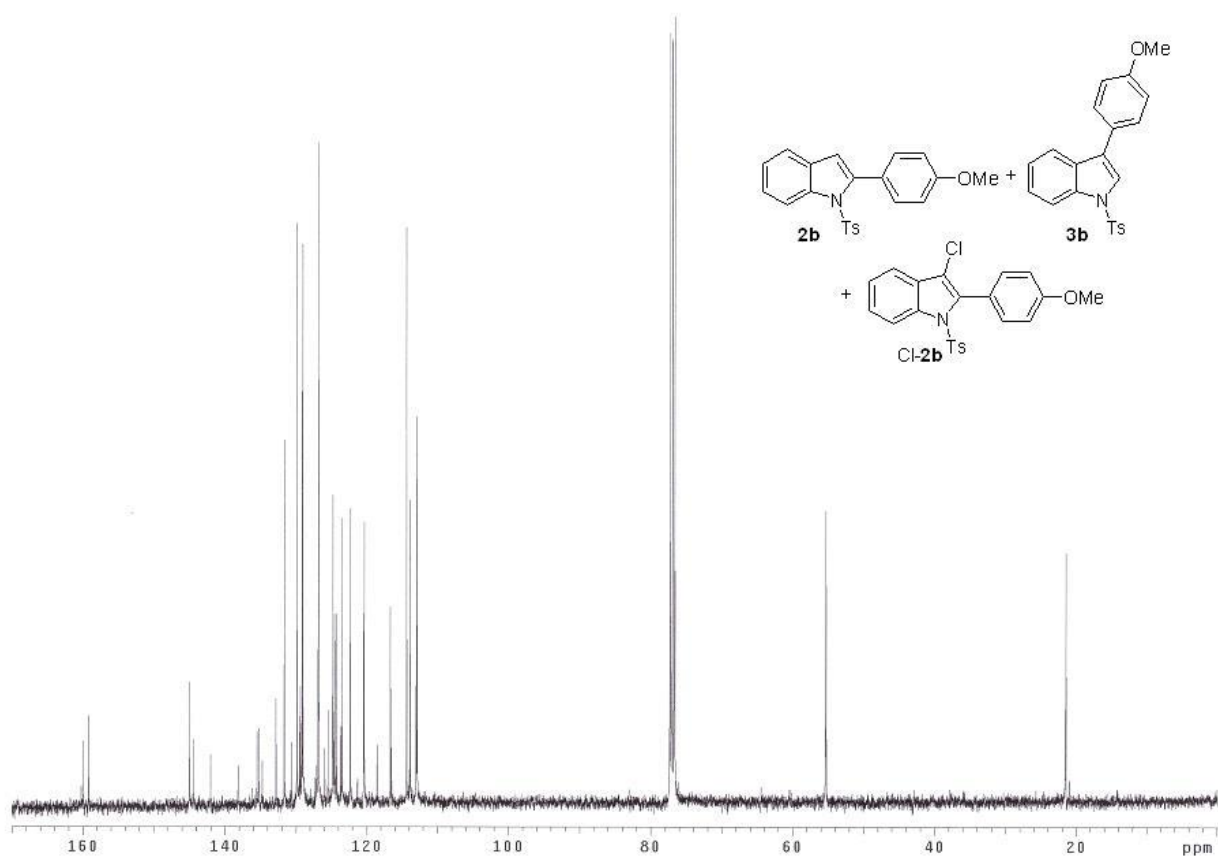



***N*-Ts-2-*p*-Tolyindole (2), *N*-Ts-3-*p*-Tolyindole (3), & *N*-Ts-3-Chloro-2-*p*-tolyindole (Cl-2)**

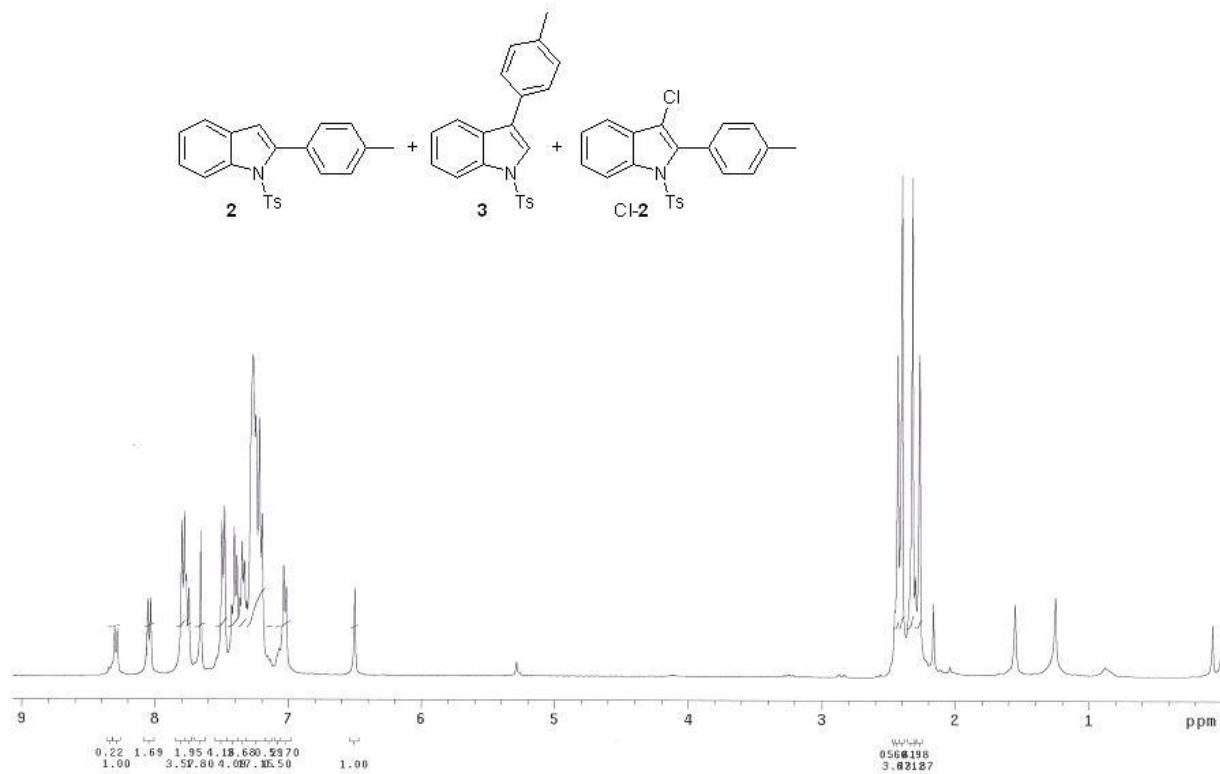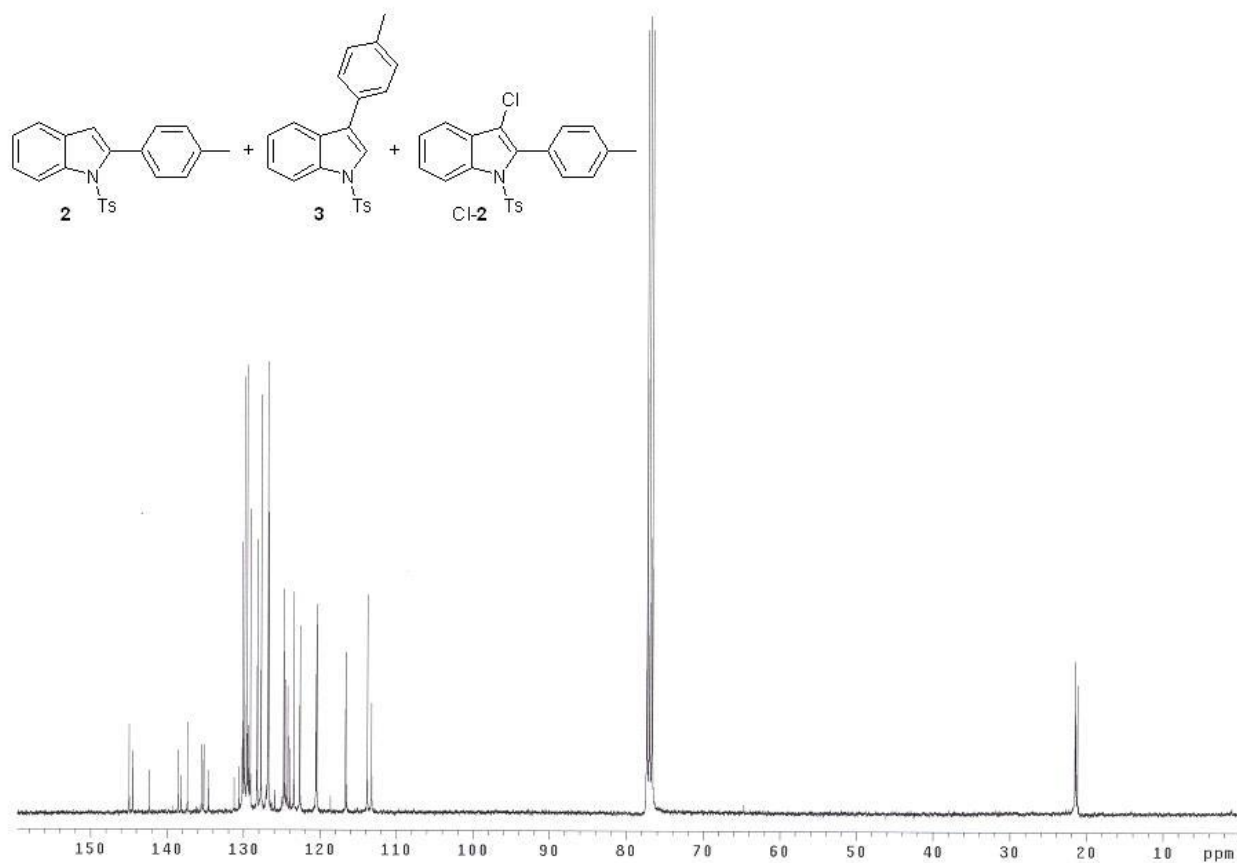

***N*-Ts-2-*m*-Tolylindole (2c) & *N*-Ts-3-*m*-Tolylindole (3c)**

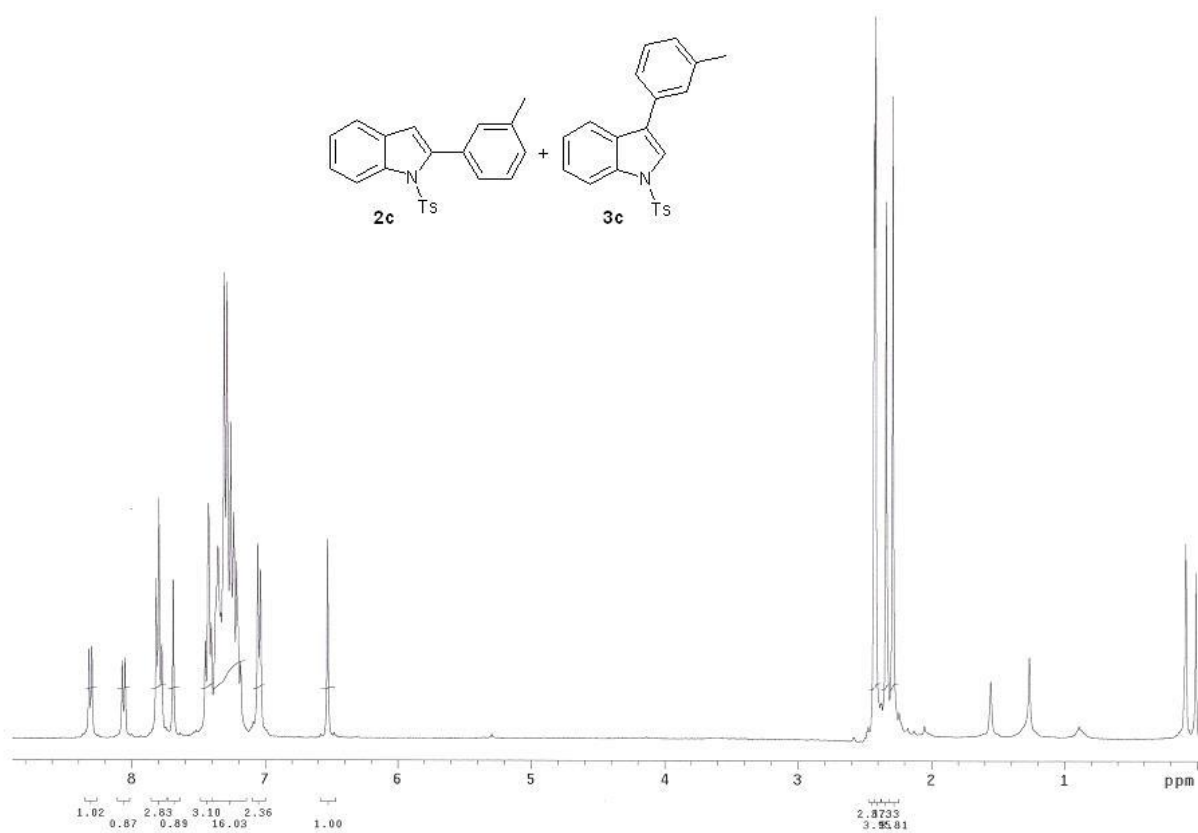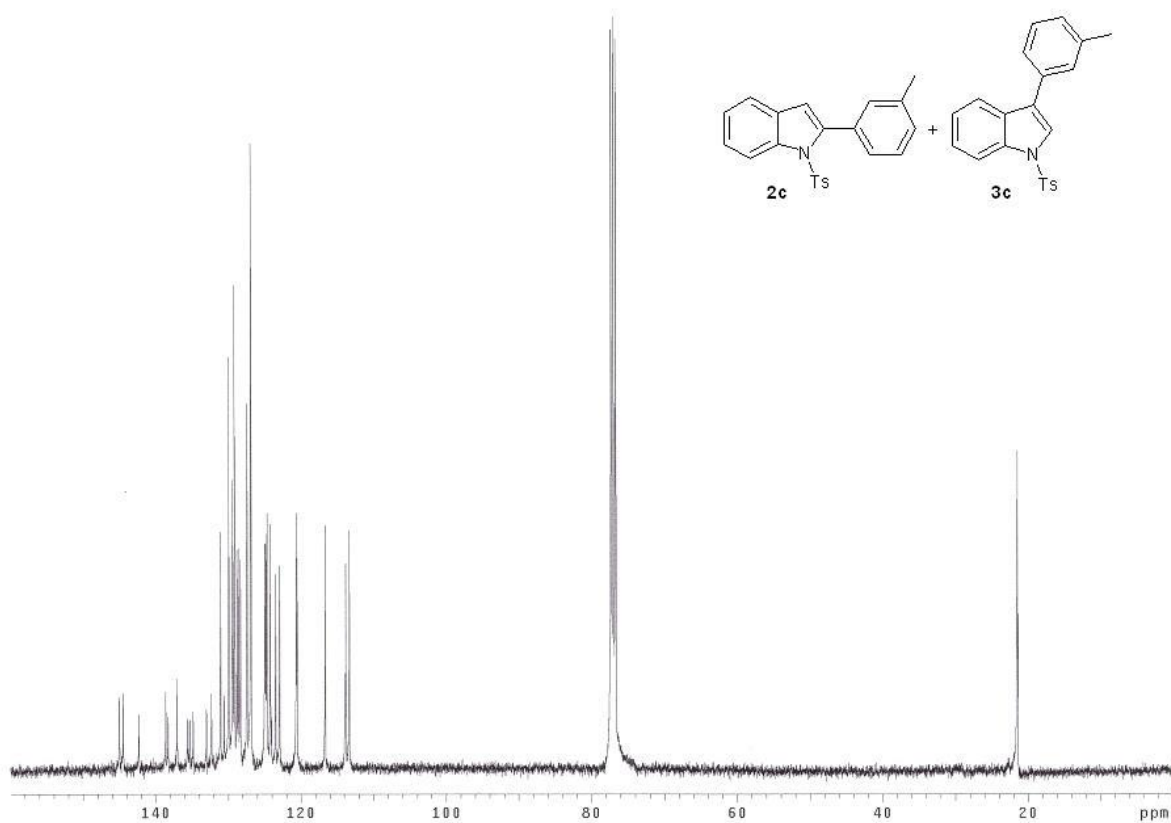

***N*-Ts-2-*o*-Tolyindole (2) & *N*-Ts-3-*o*-Tolyindole (3)**

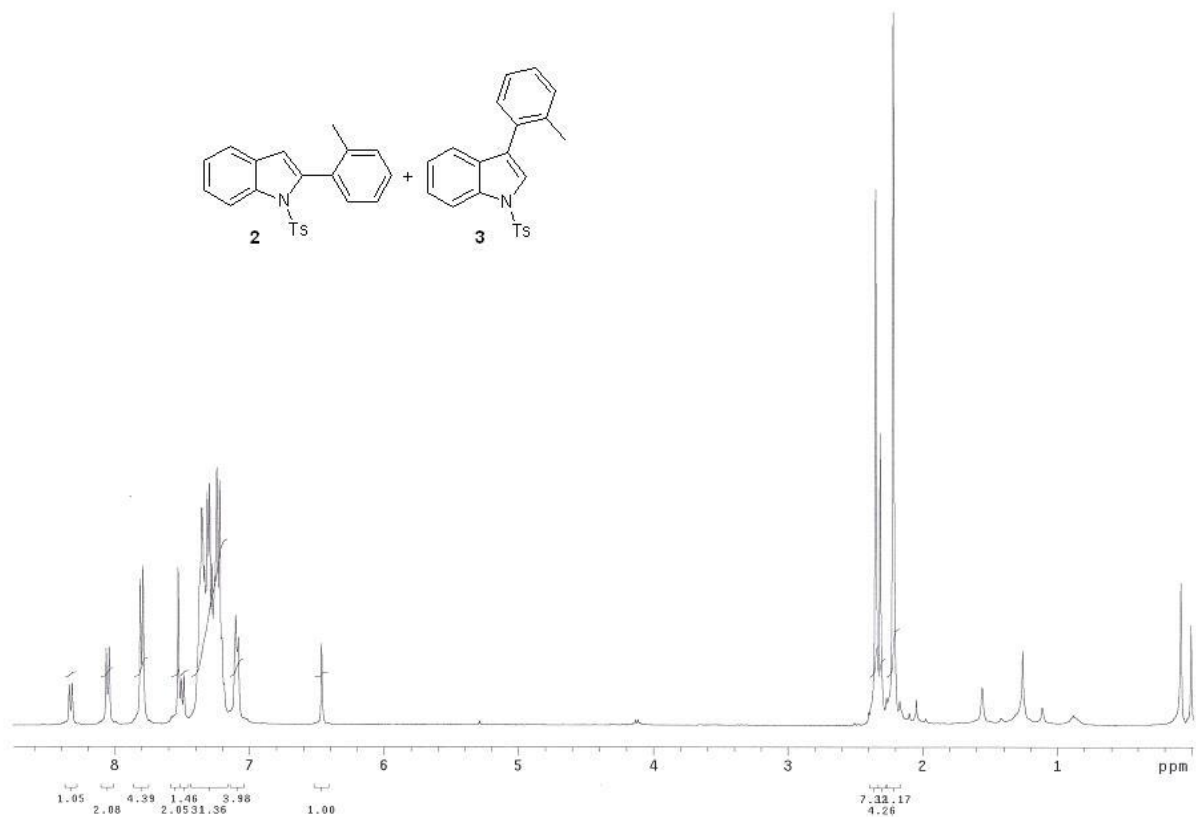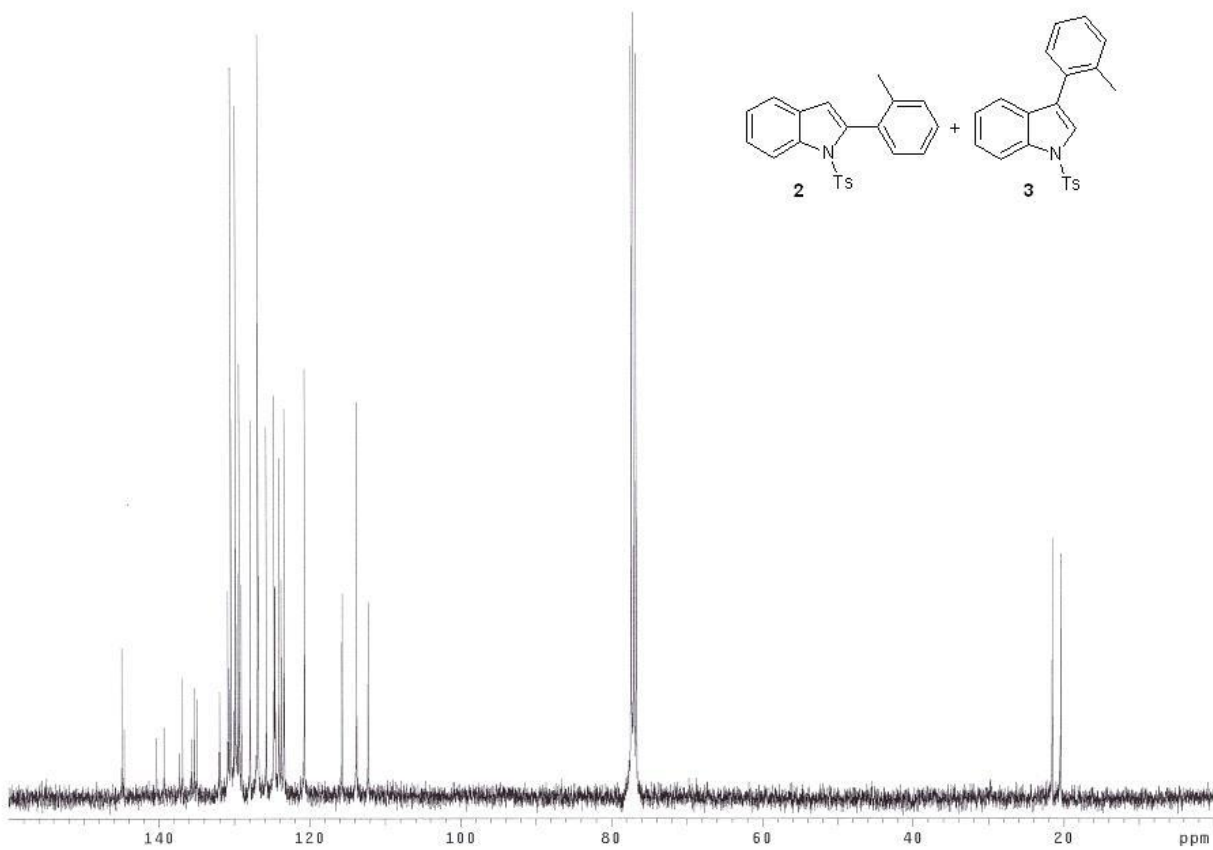



***N*-Ts-2-(4-Nitrophenyl)indole (2e)**

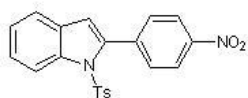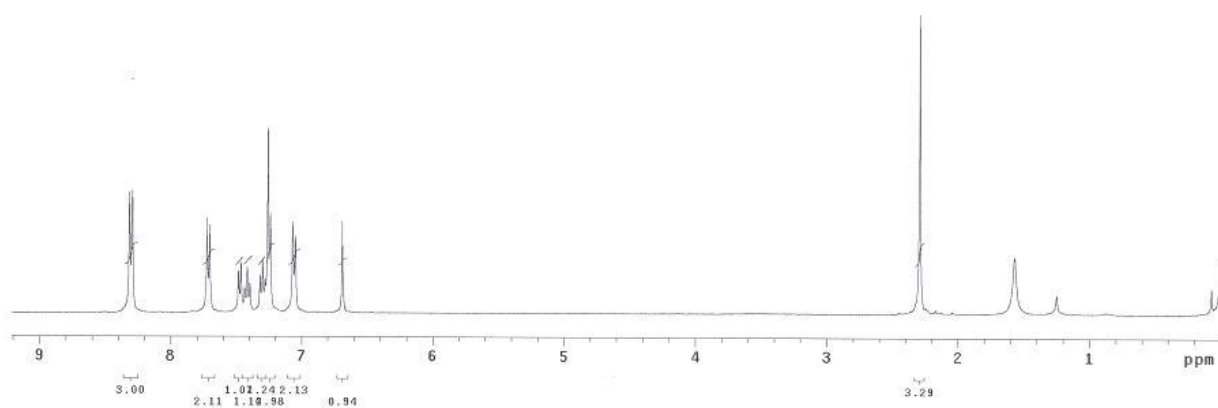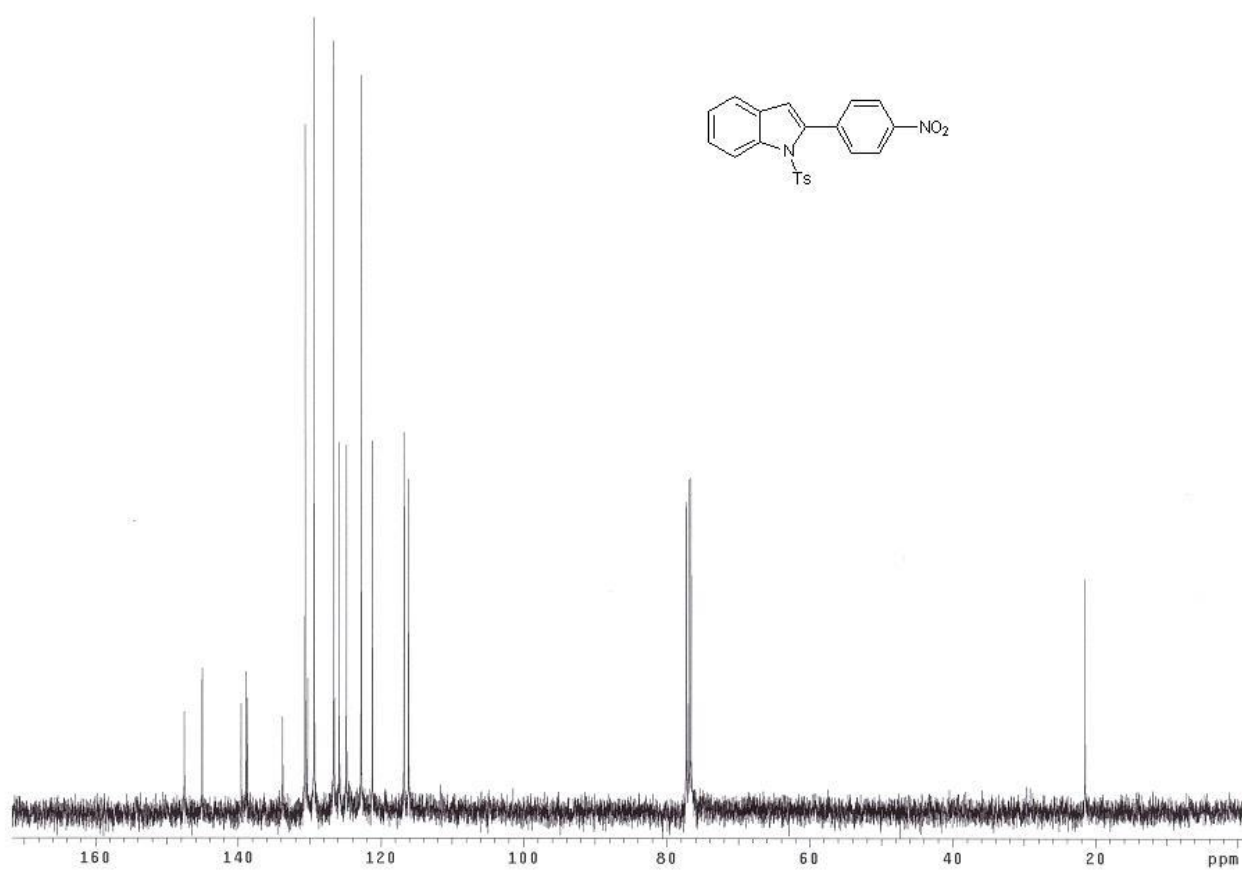



# Methyl *N*-Ts-Indole-2-carboxylate (2f)

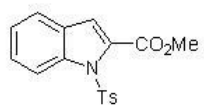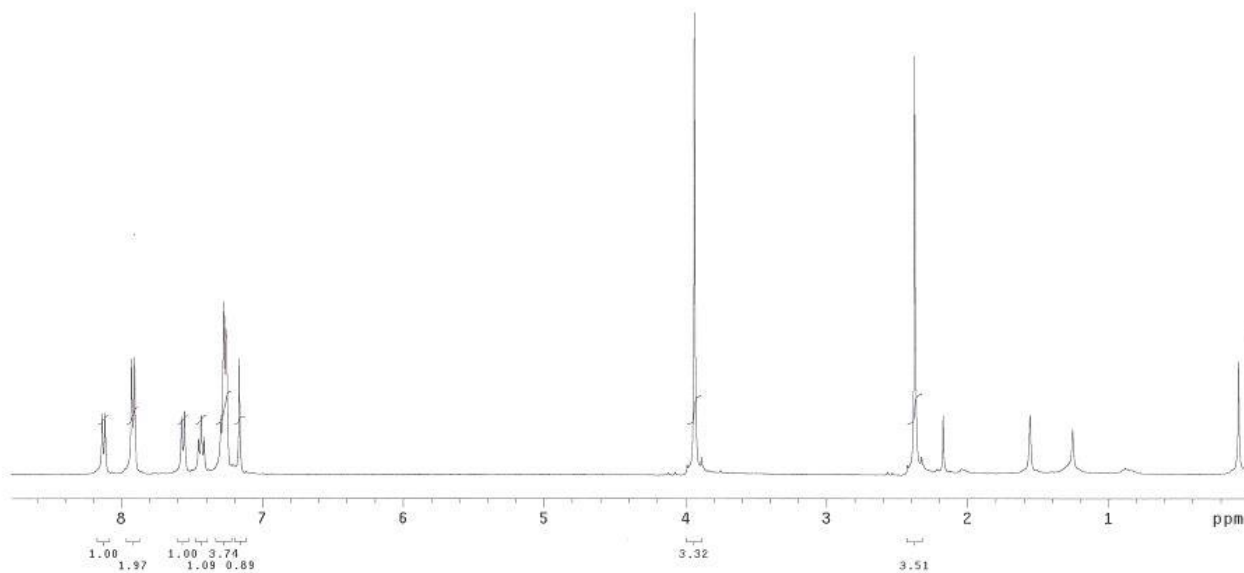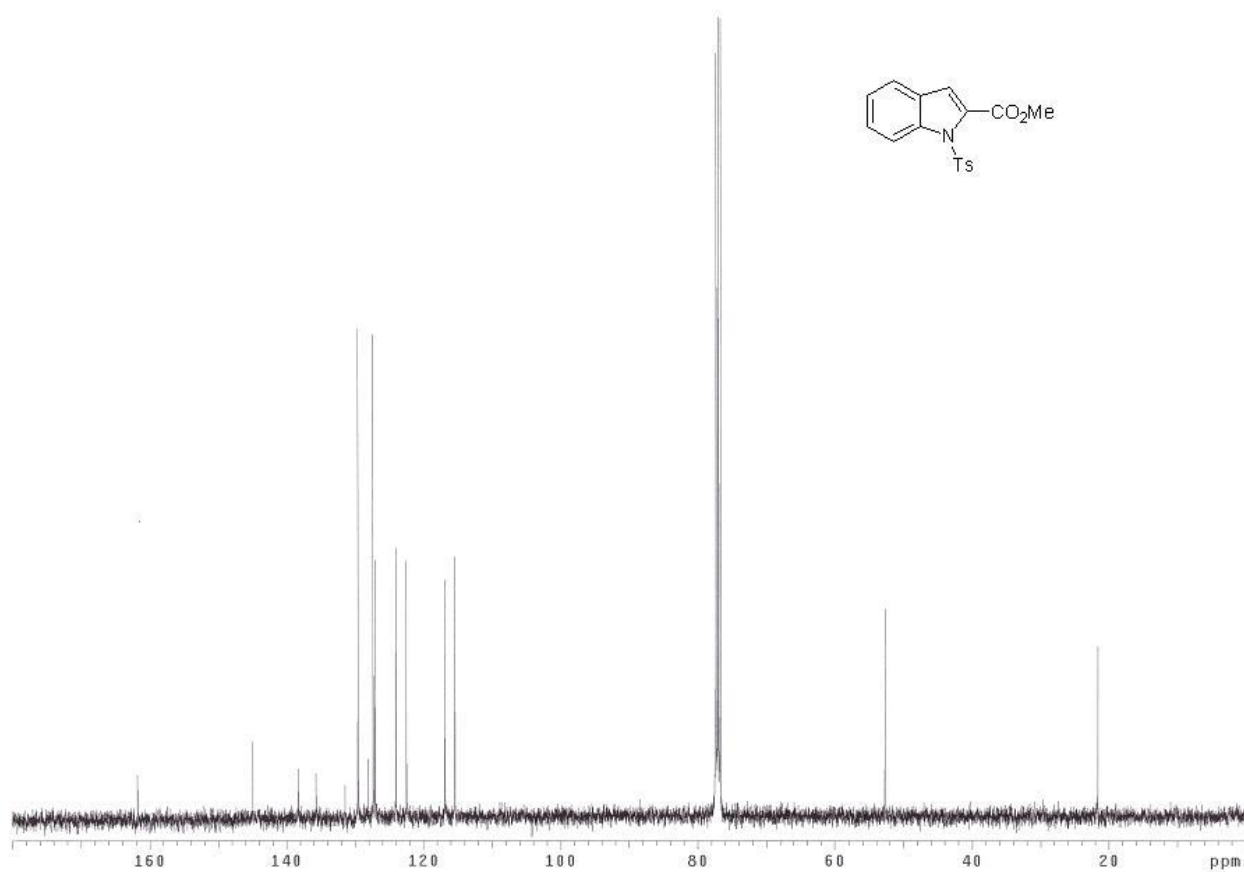

***N*-Ts-2-*n*-Hexylindole (2g)**

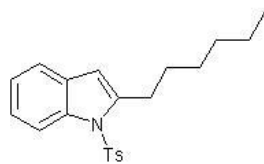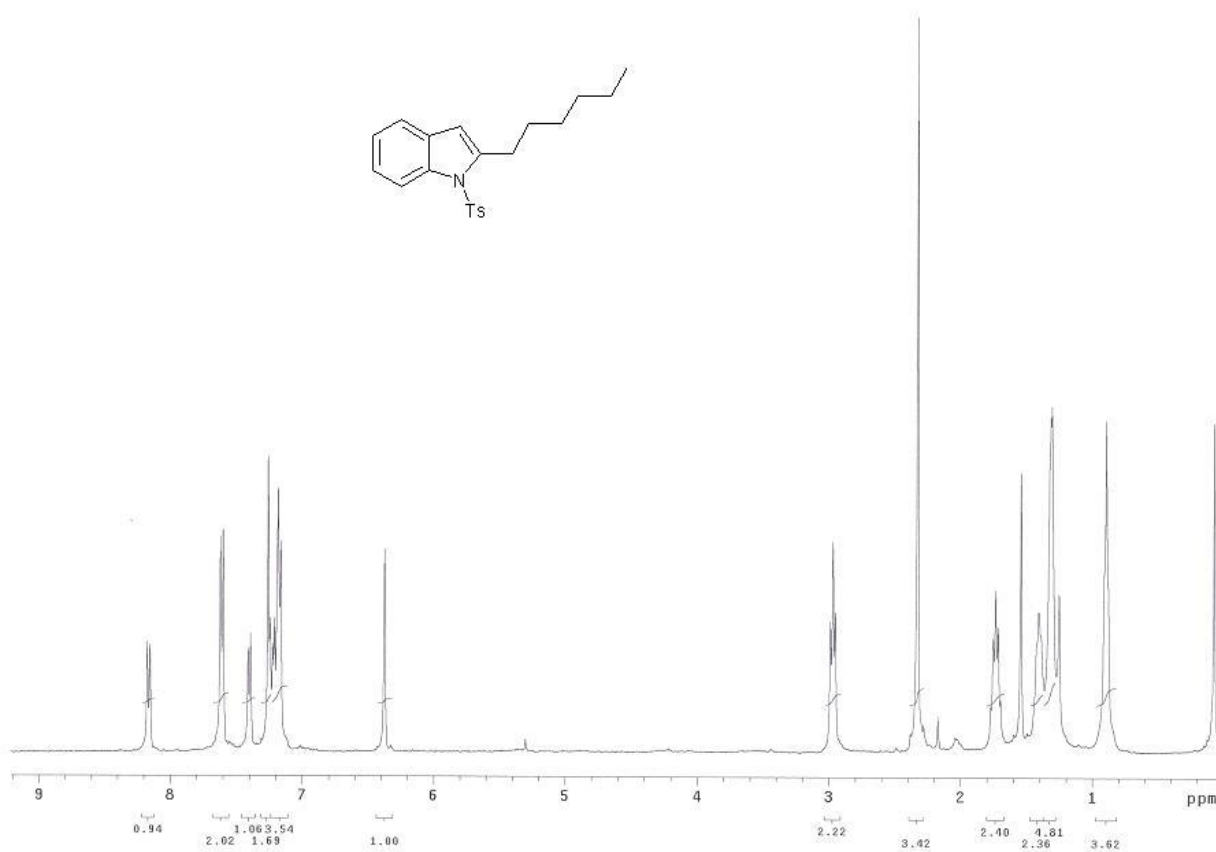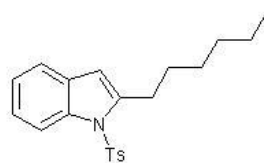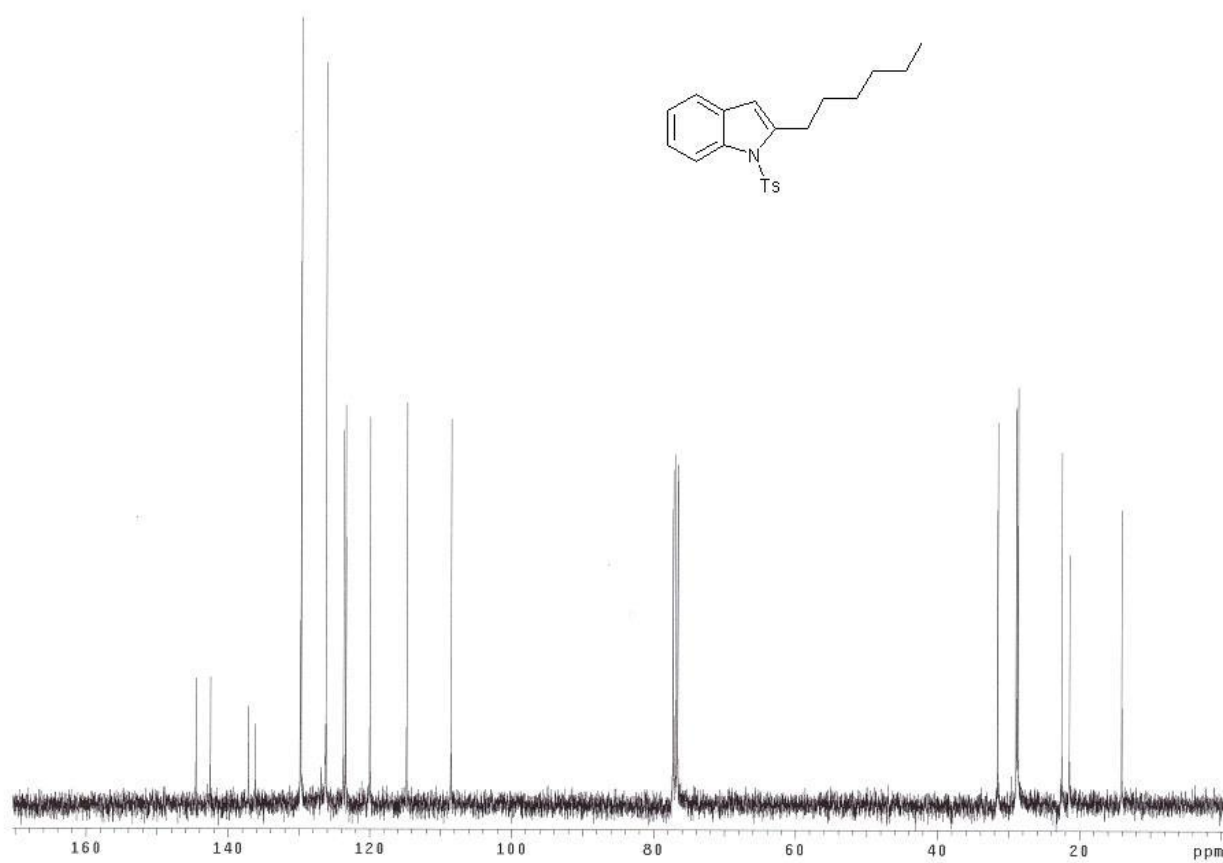



***N*-Ts-5-Methyl-2-phenylindole (2h) & *N*-Ts-5-Methyl-3-phenylindole (3h)**

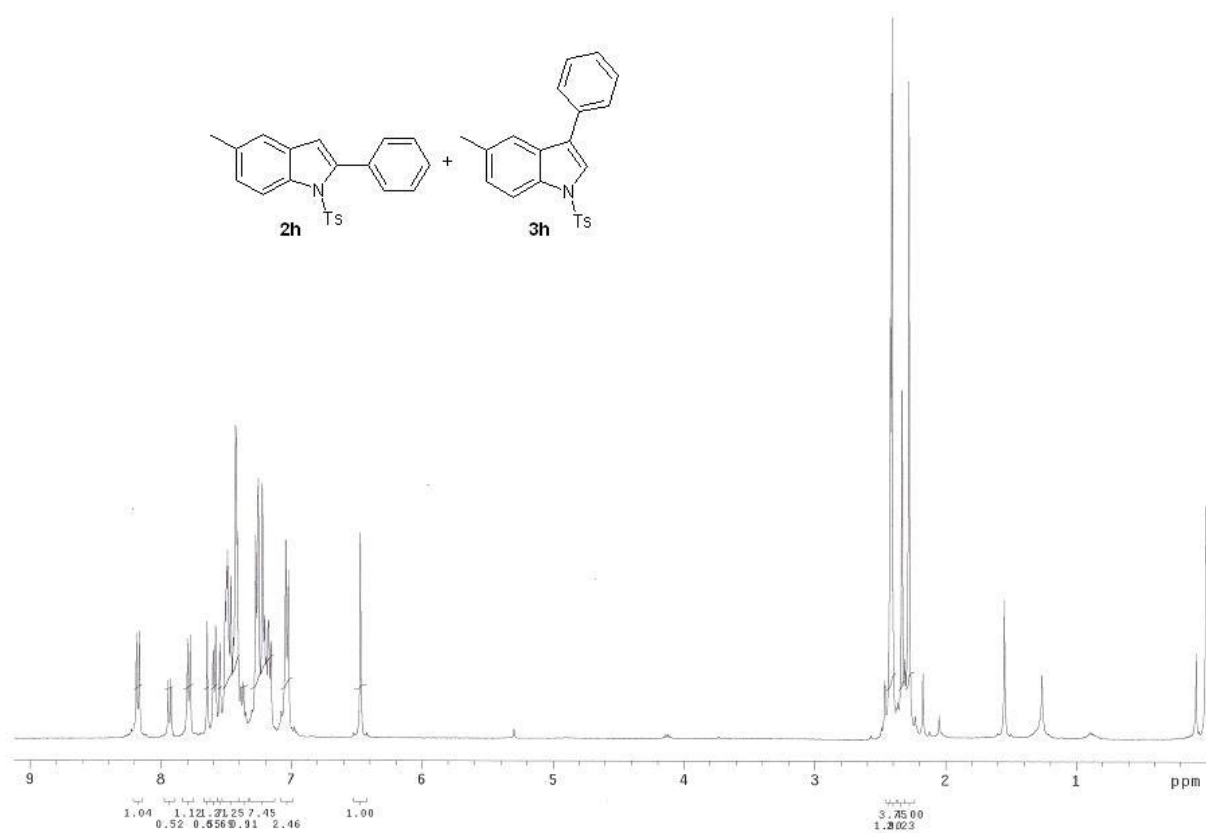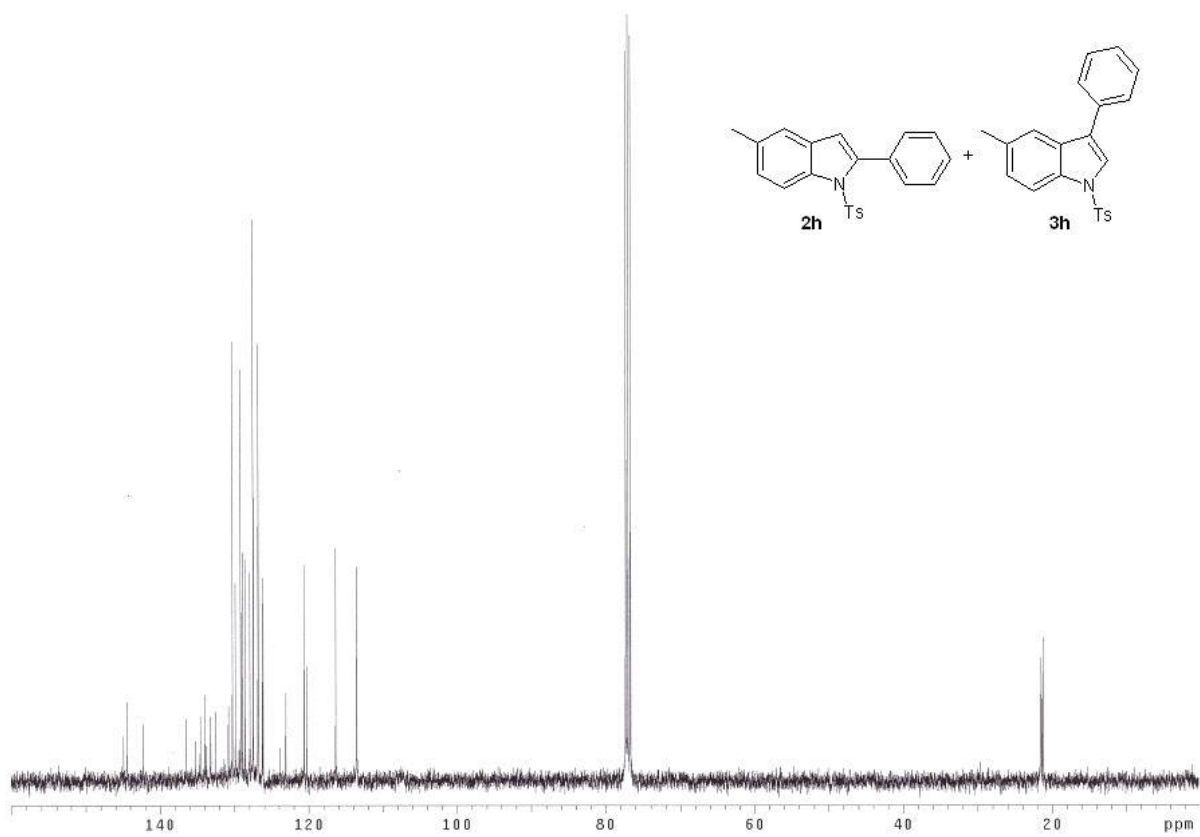

***N*-Ts-5-Chloro-2-phenylindole (2) & *N*-Ts-5-Chloro-3-phenylindole (3)**

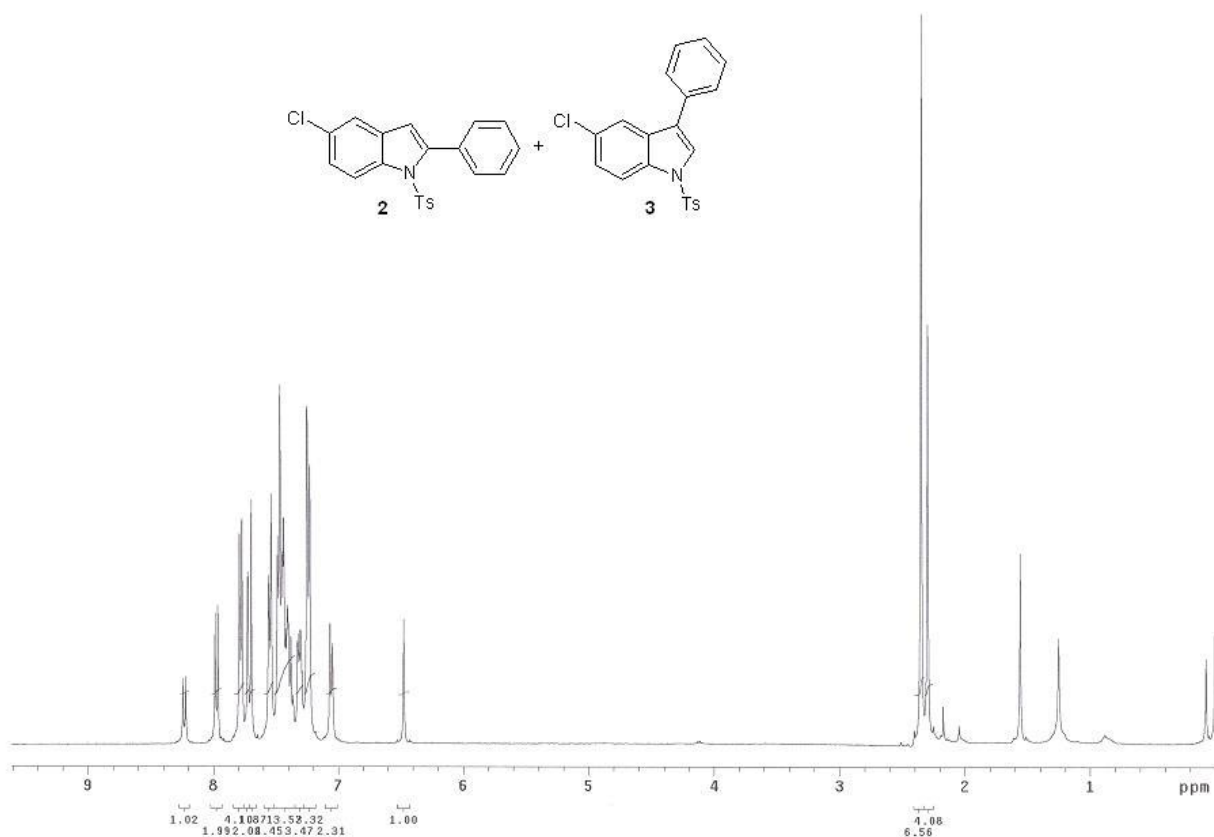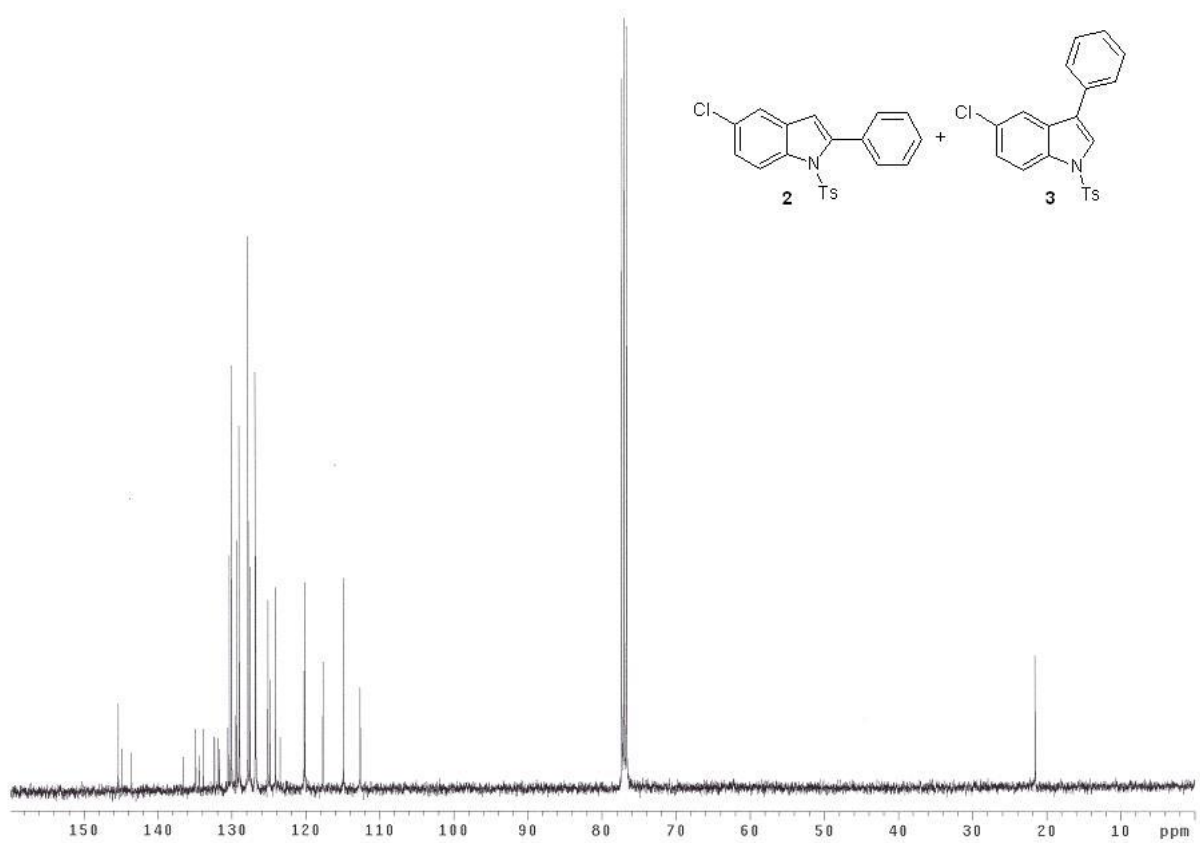

***N*-Ts-5-Nitro-2-phenylindole (2i) & *N*-Ts-5-Nitro-3-phenylindole (3i)**

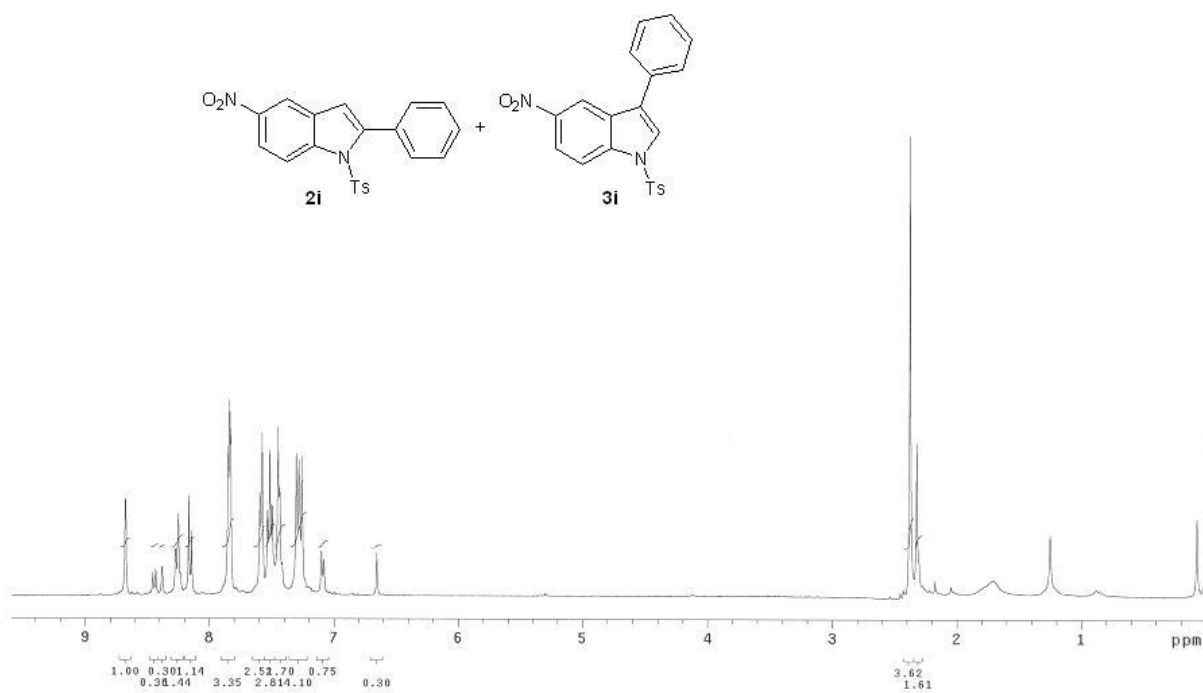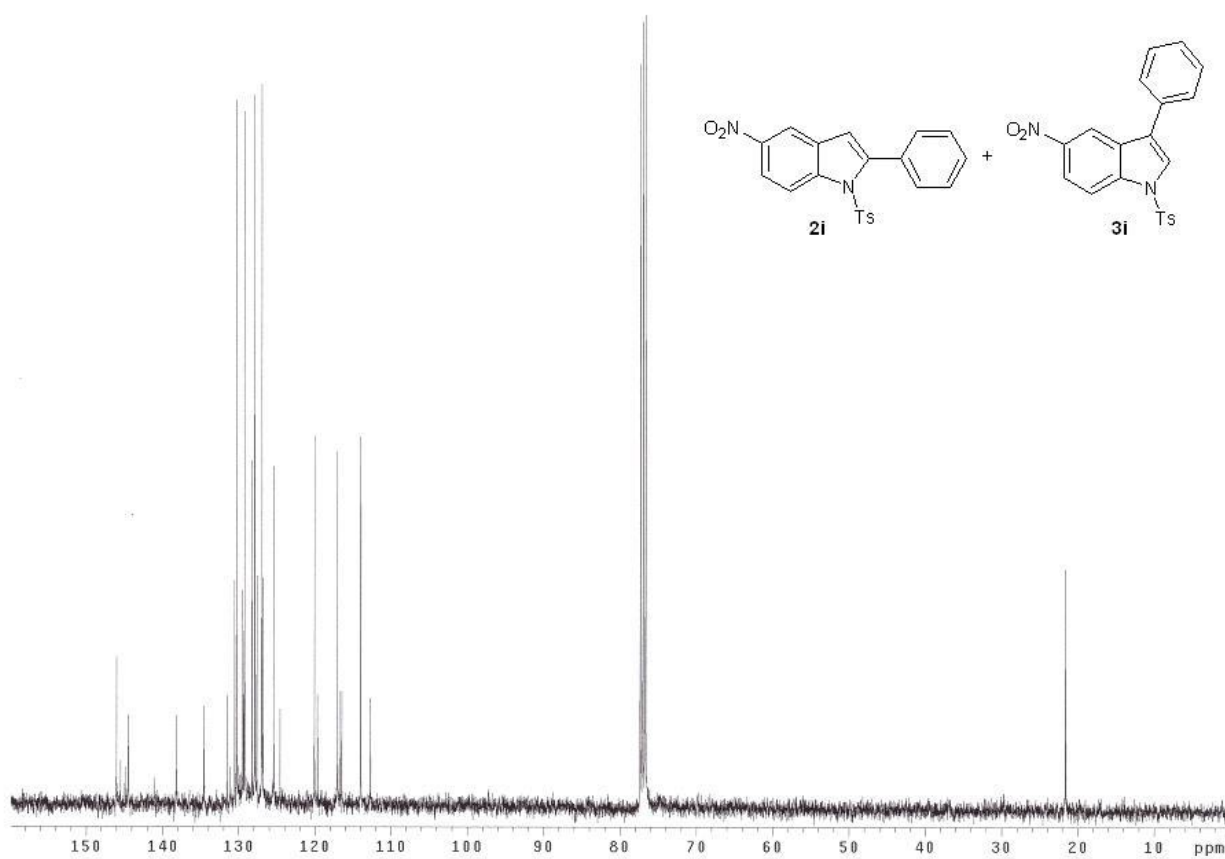

***N*-Ts-6-Methyl-2-phenylindole (2), *N*-Ts-6-Methyl-3-phenylindole (3), & *N*-Ts-3-Chloro-6-methyl-2-phenylindole (Cl-2)**

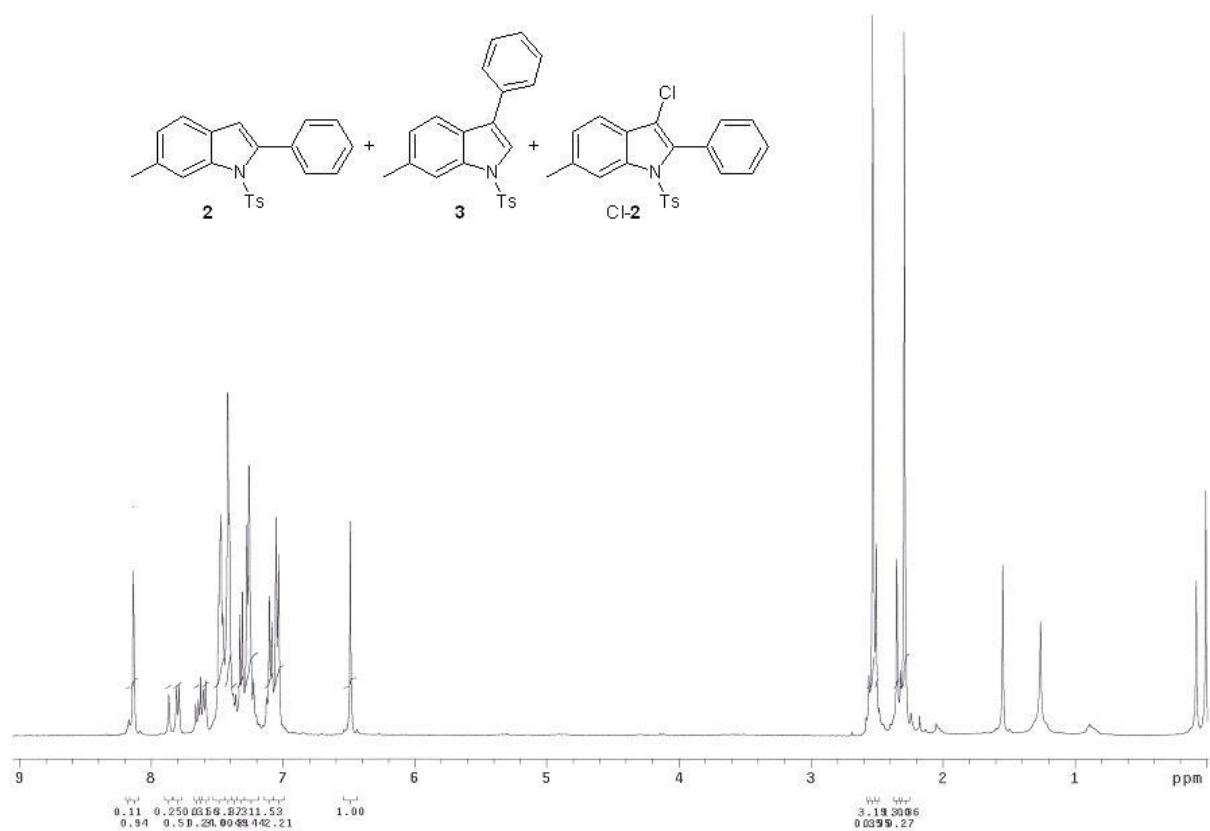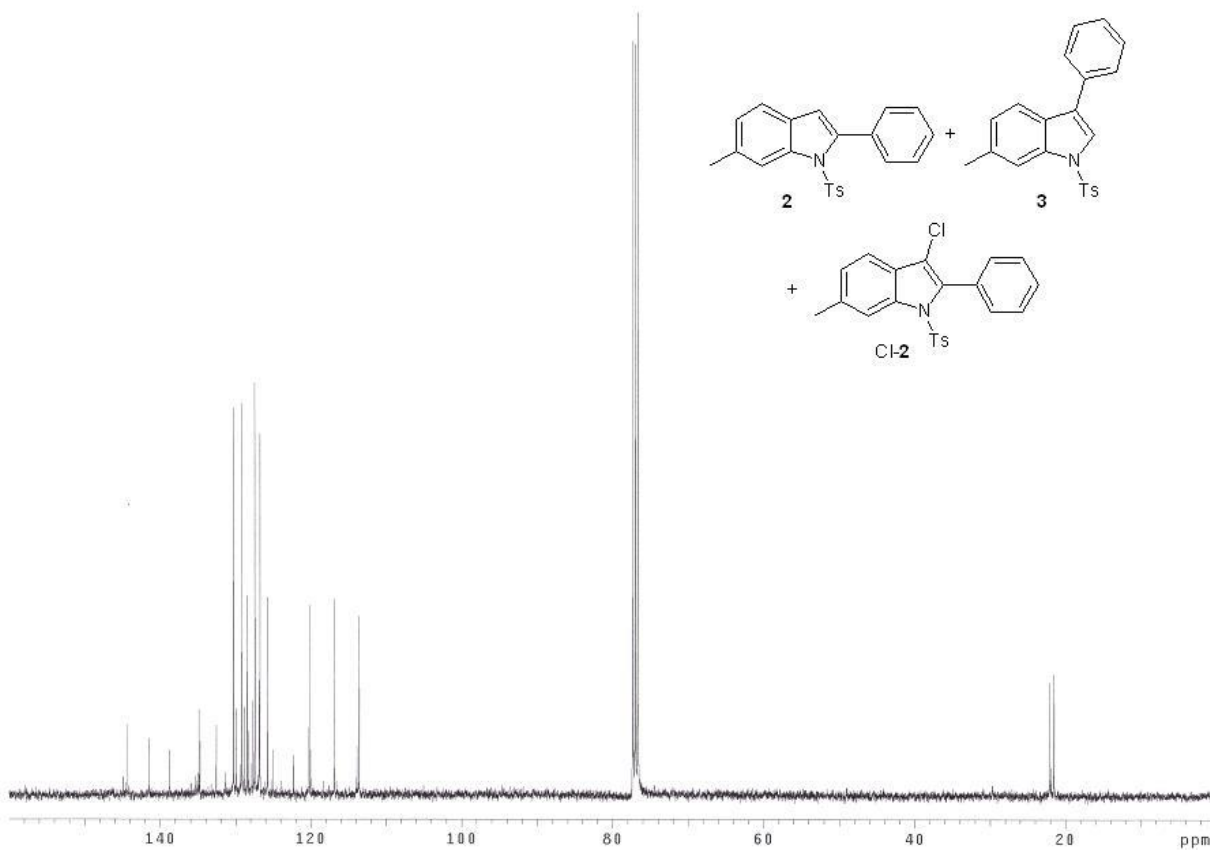

***N*-Ts-6-Chloro-2-phenylindole (2j) & *N*-Ts-6-Chloro-3-phenylindole (3j)**

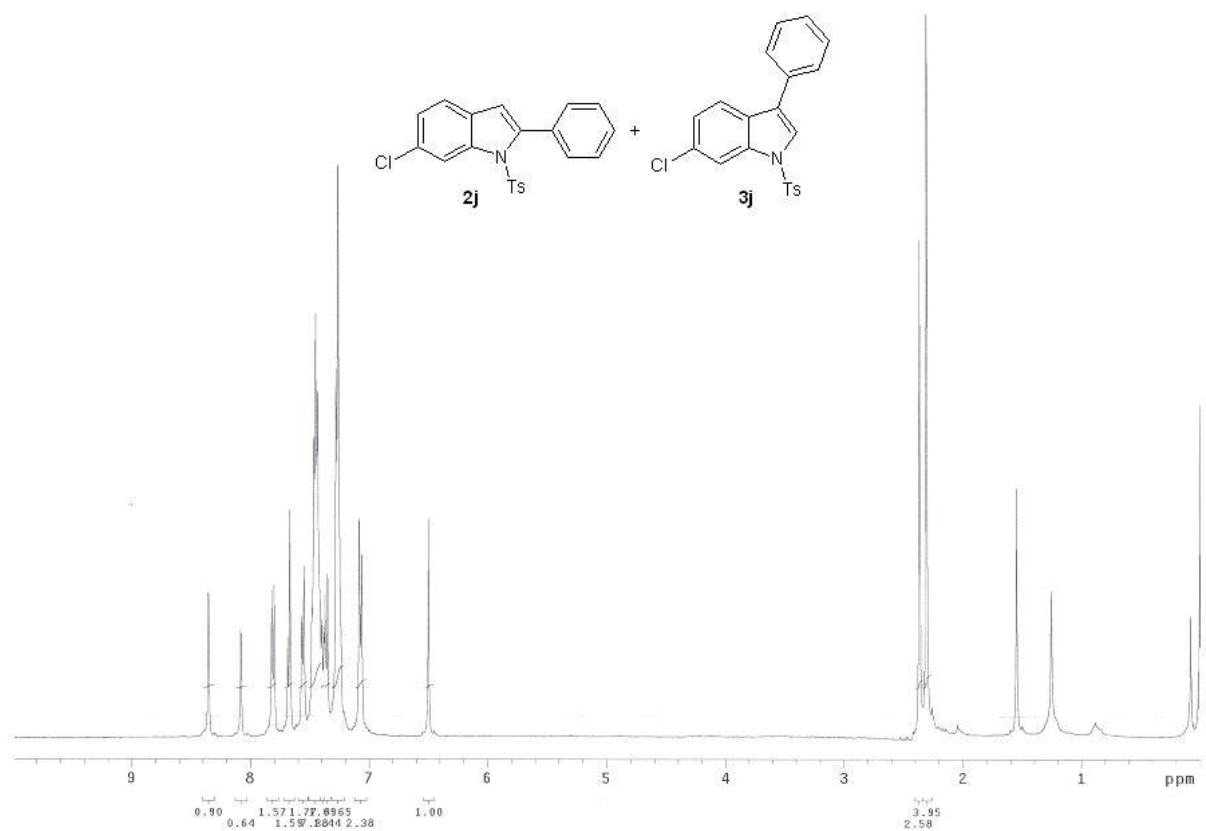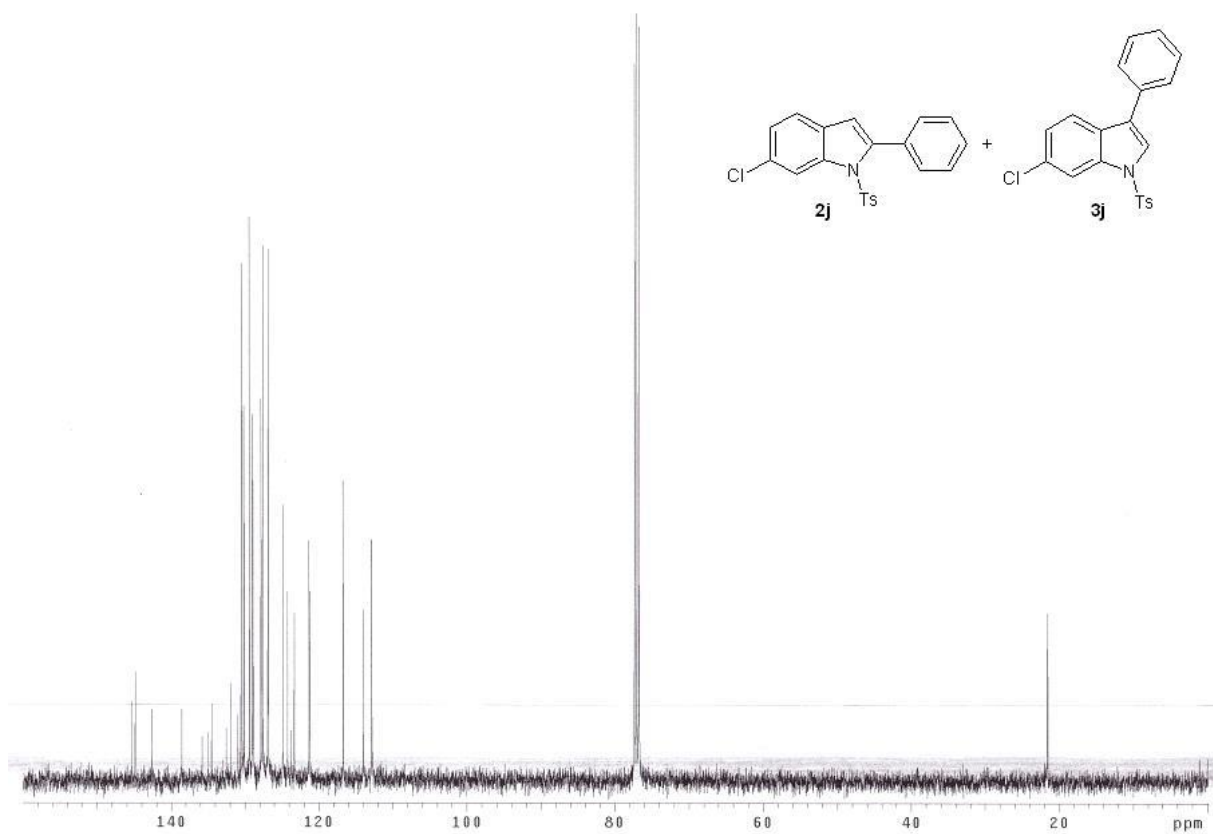

***N*-Ts-6-Nitro-2-phenylindole (2k) & *N*-Ts-6-Nitro-3-phenylindole (3k)**

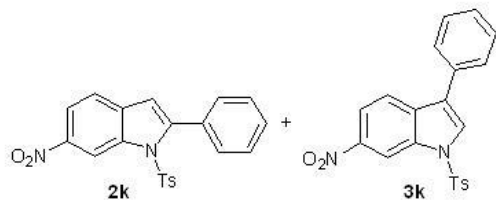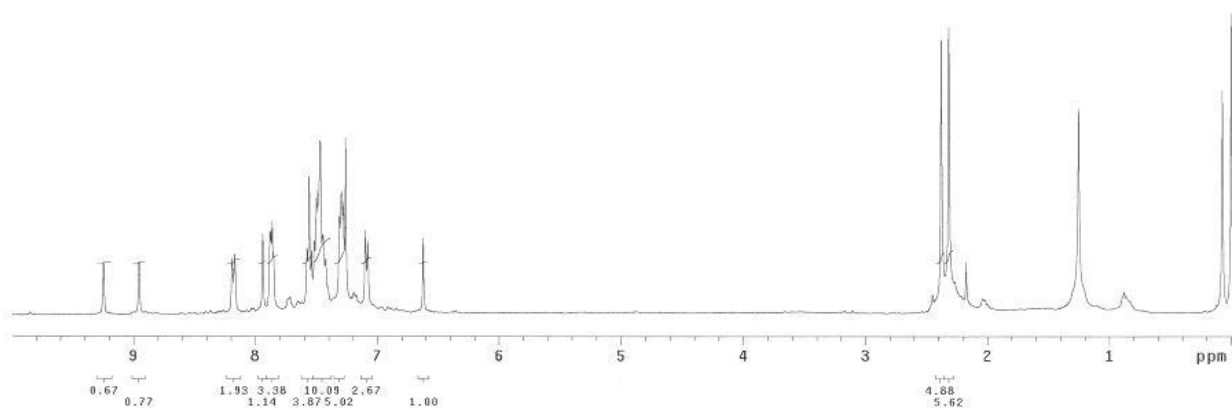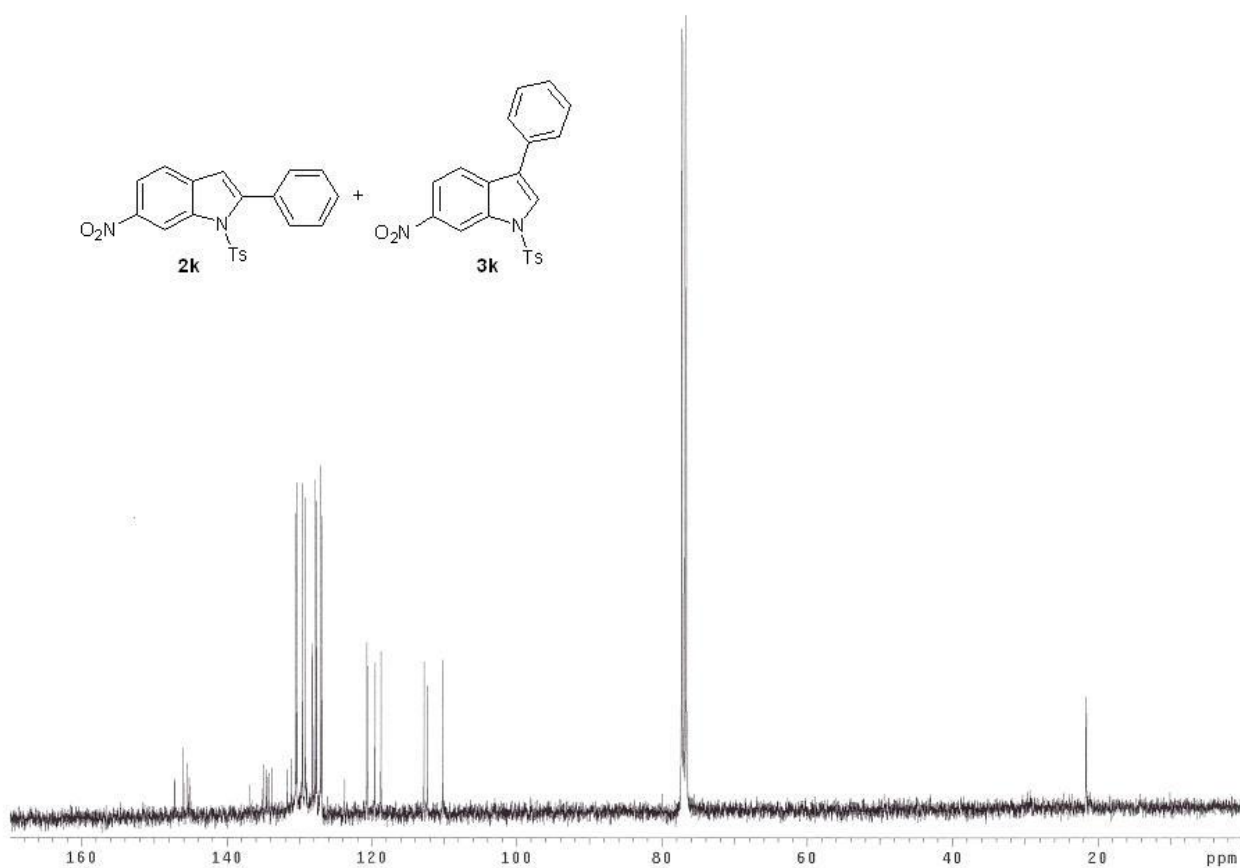

***N*-Ts-3-(4-Methoxyphenyl)-2-(4-(trifluoromethyl)phenyl)indole (3l)**

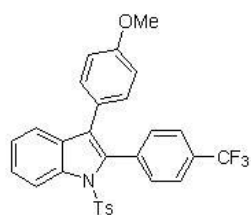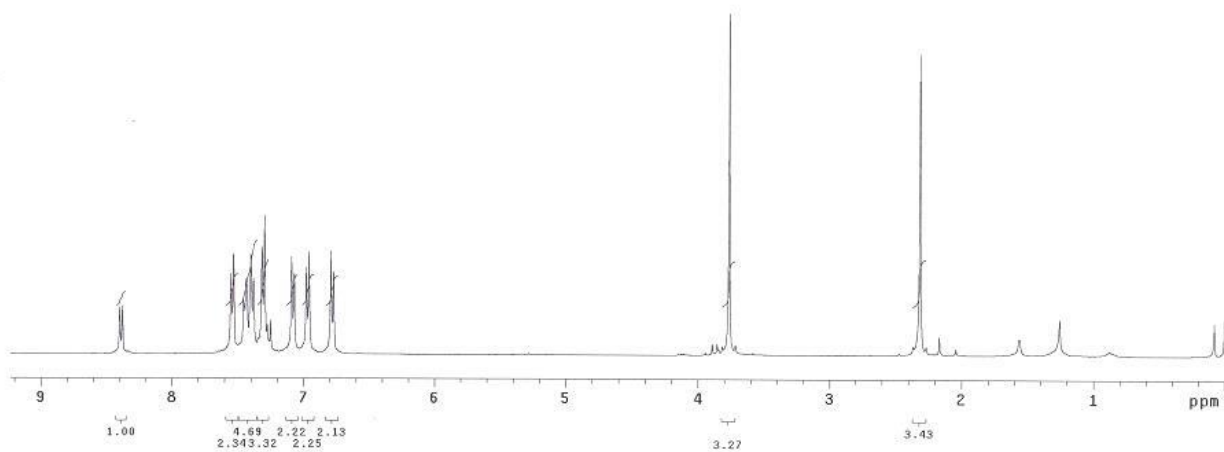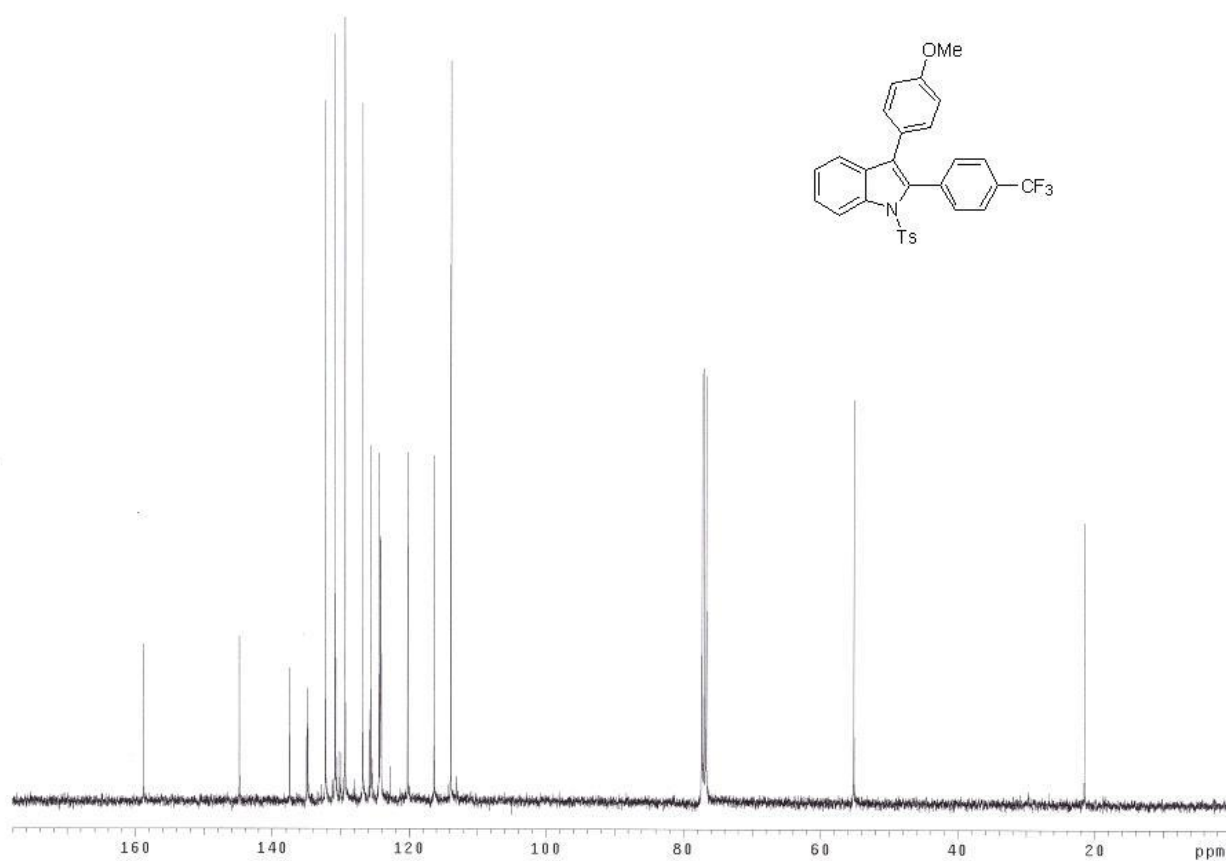

***N*-Ts-3-*p*-Tolyl-2-(4-(trifluoromethyl)phenyl)indole (3m)**

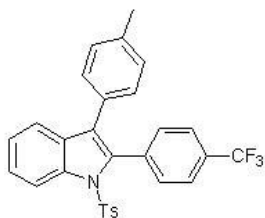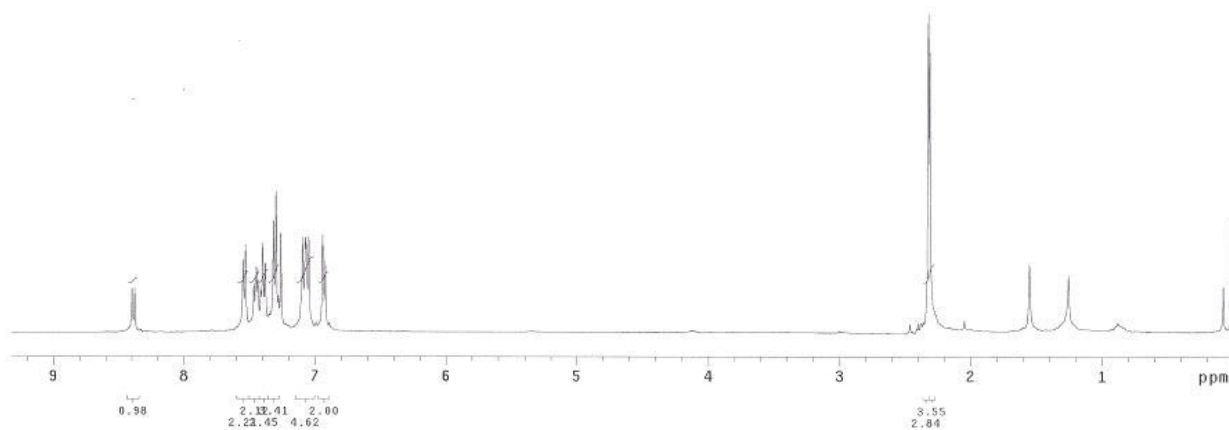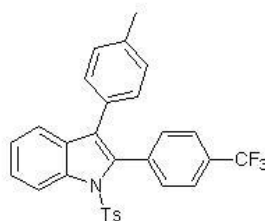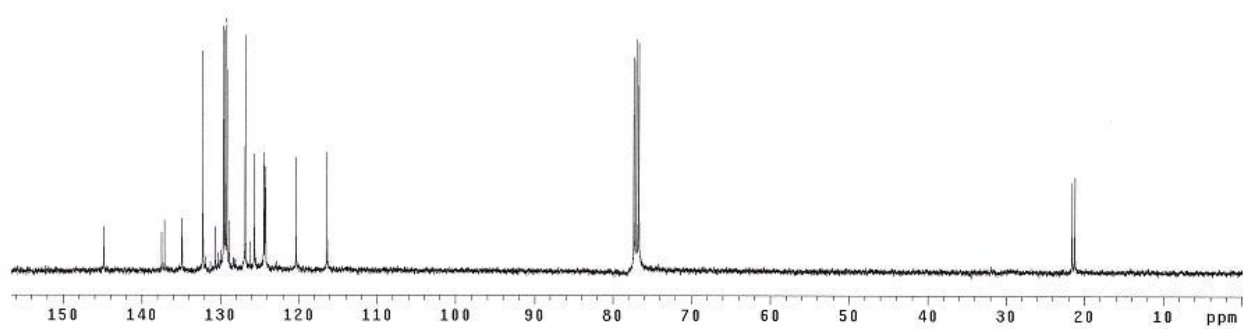



***N*-Ts-3-Phenyl-2-(4-(trifluoromethyl)phenyl)indole (3n) & *N*-Ts-2-Phenylindole (2a)**

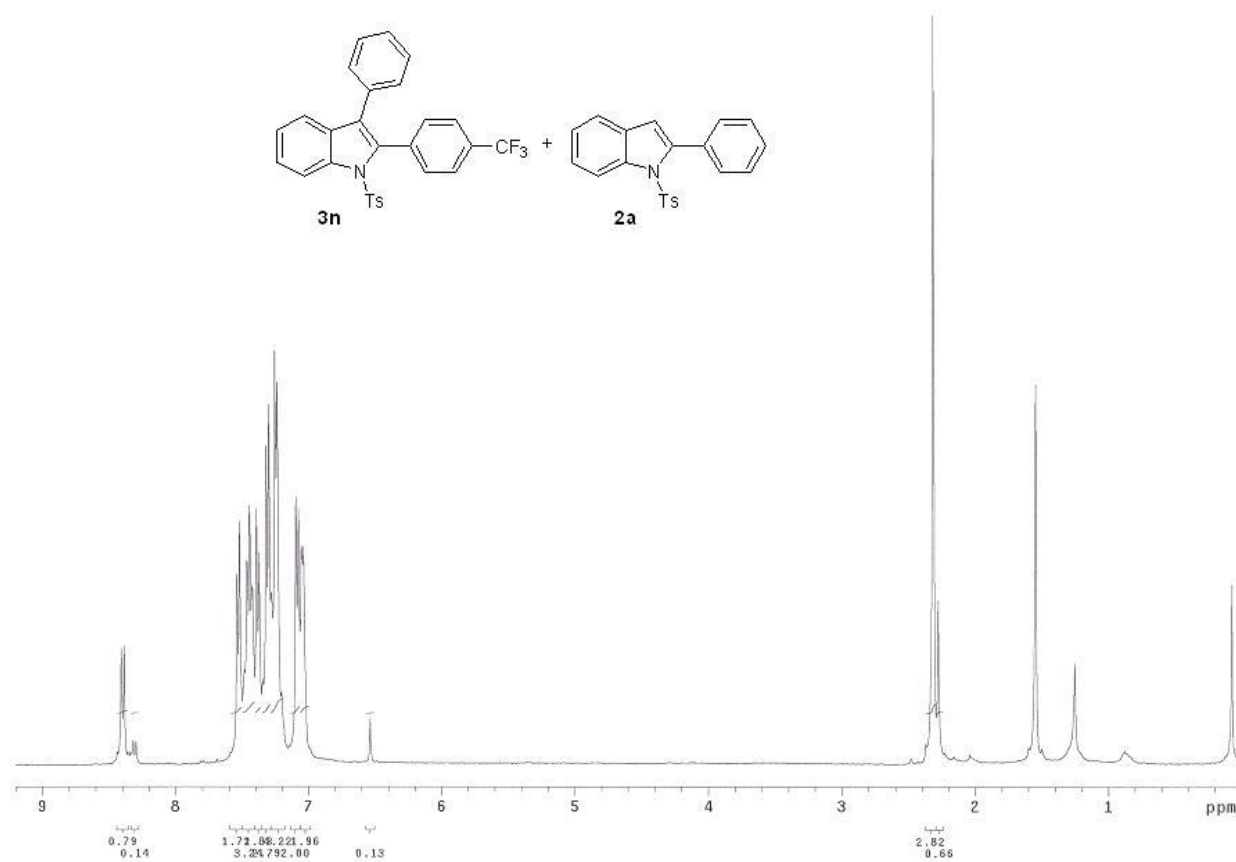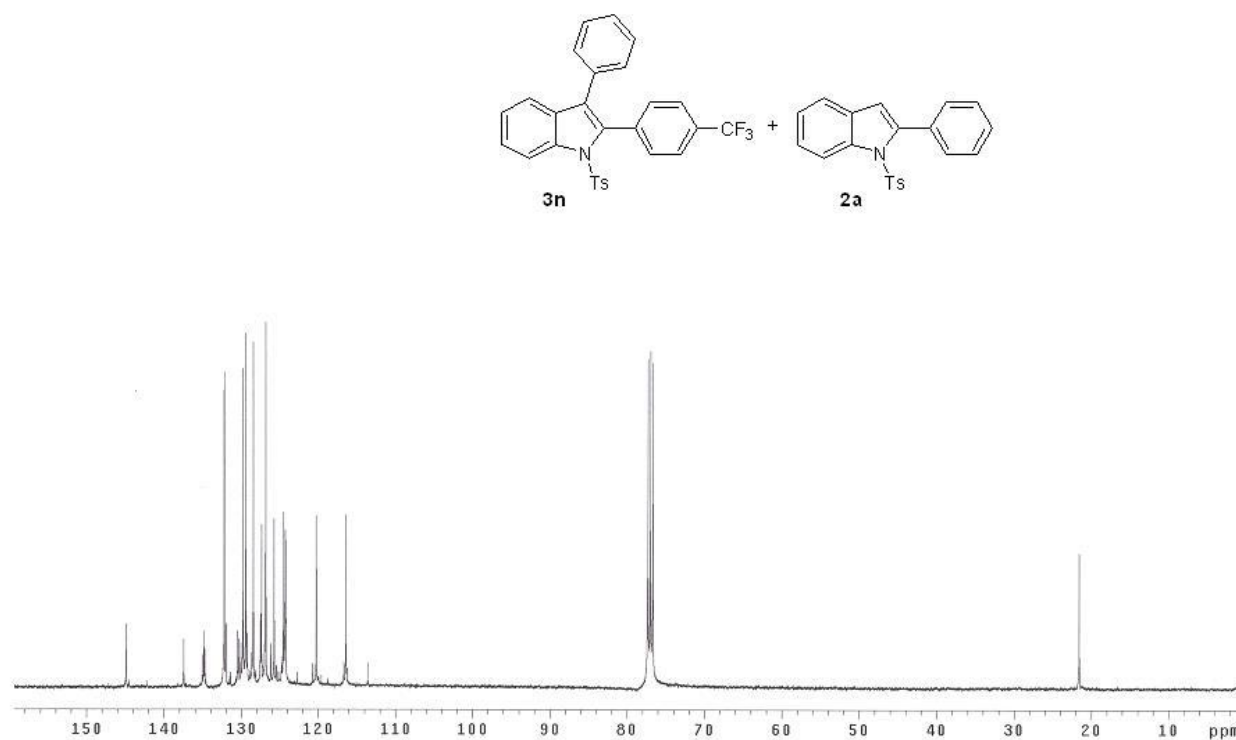

# *N*-Ts-2,3-Diphenylindole

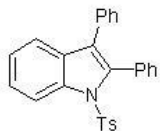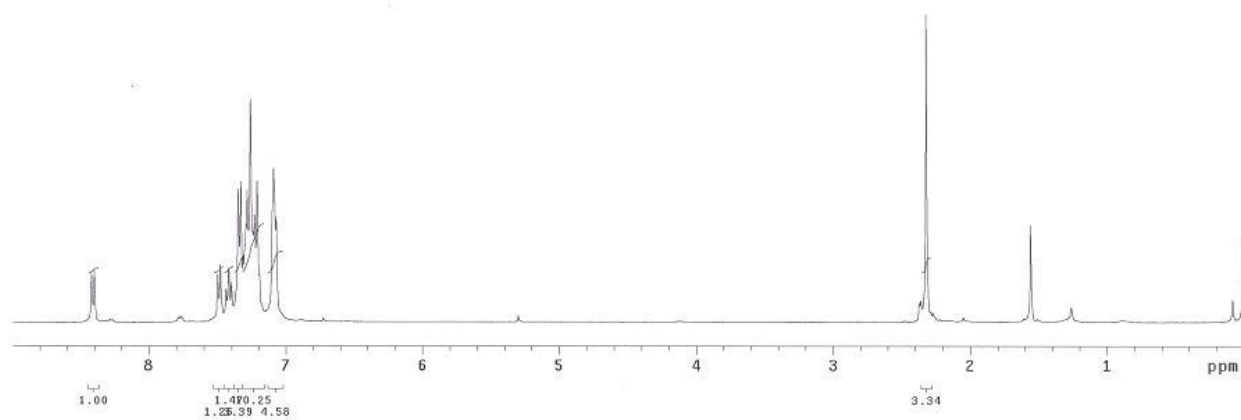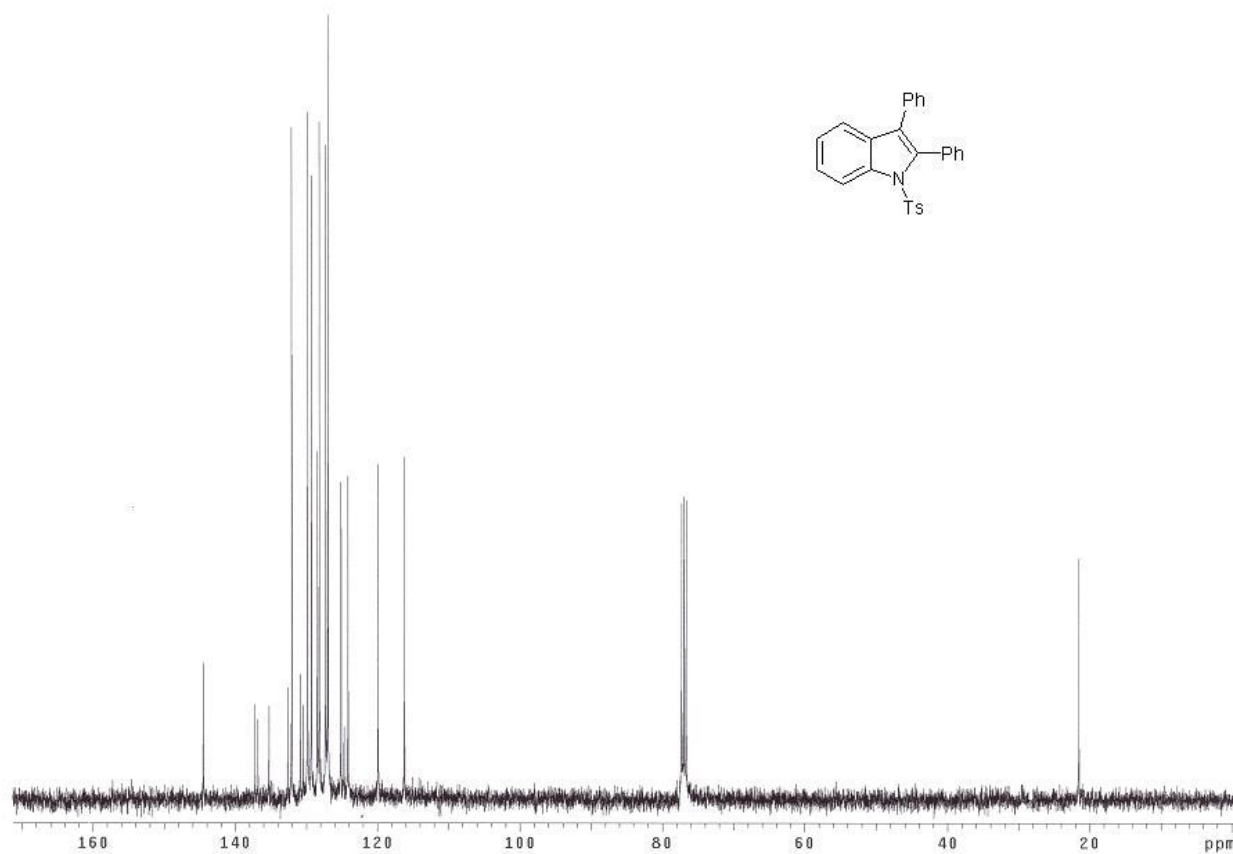

***N*-Ts-2-Methyl-3-phenylindole (3o)**

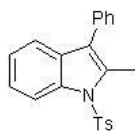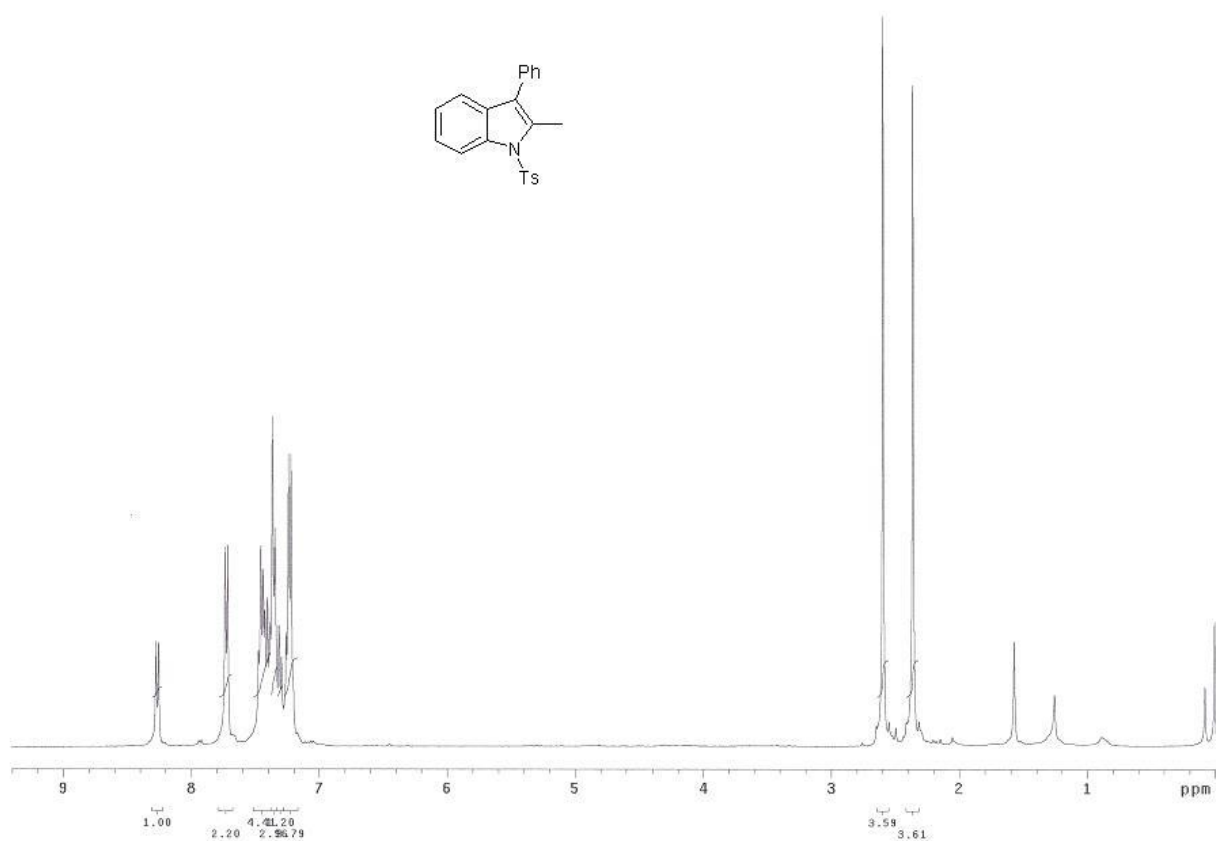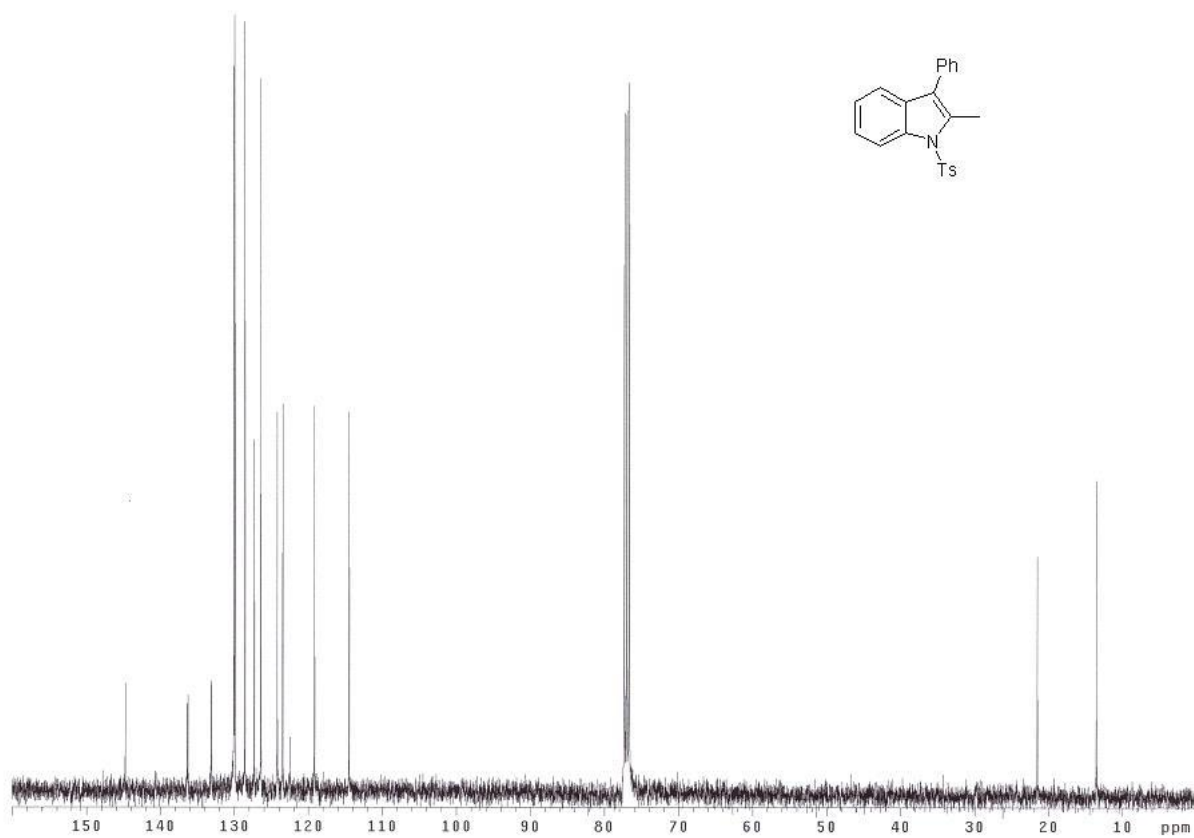

***N*-Ts-7,8-Dihydro-6*H*-benzo[6,7]oxepino[4,5-*b*]indole (3p)**

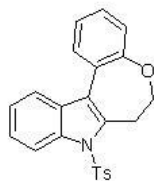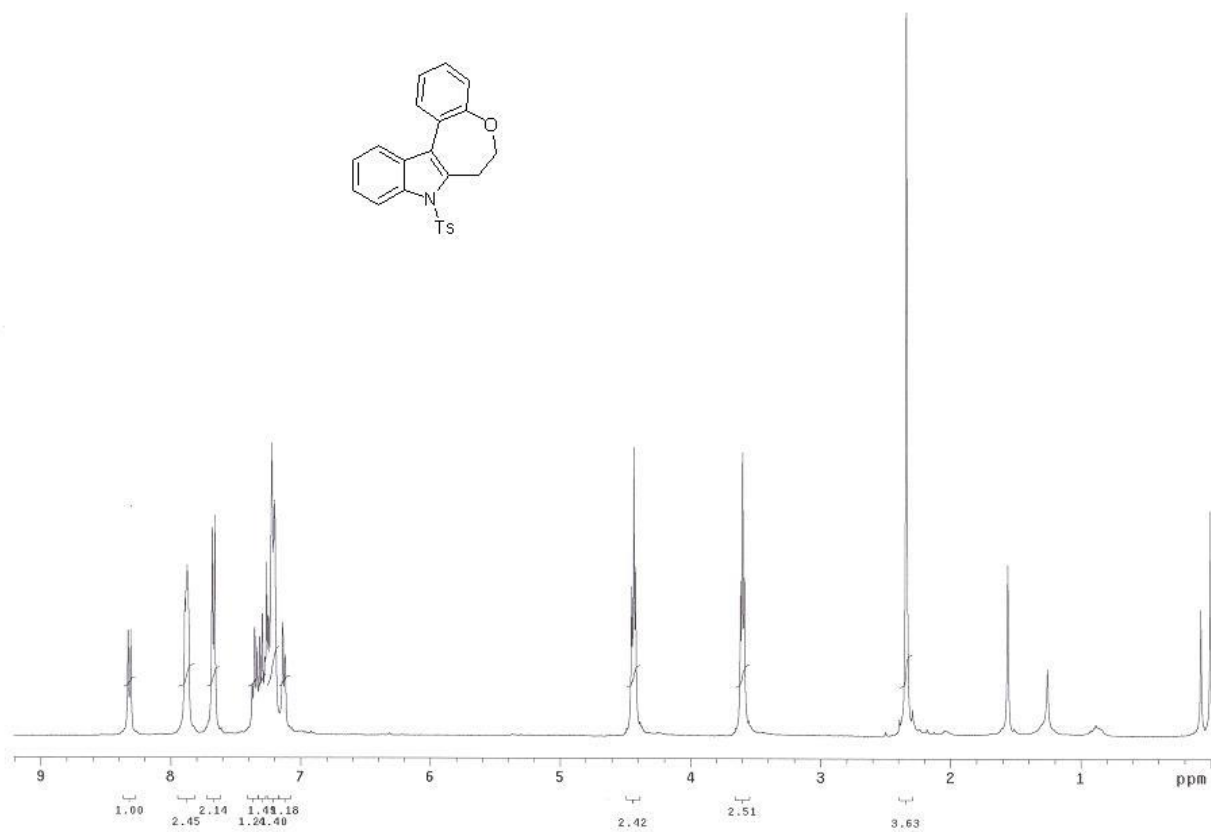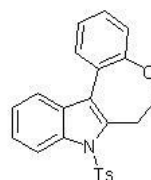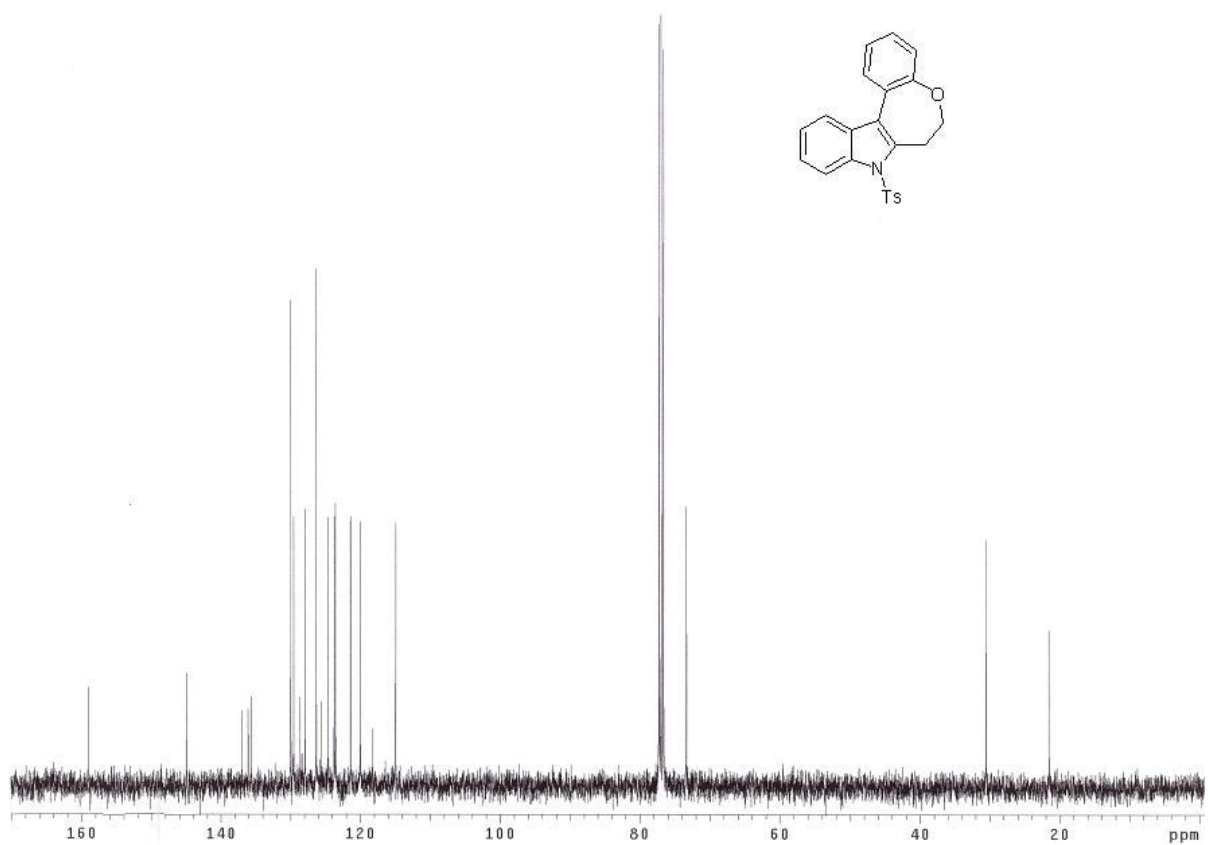

***N*-Ts-Spiro(chroman-4,2'-indoline) (4)**

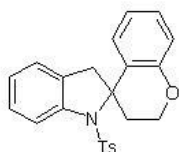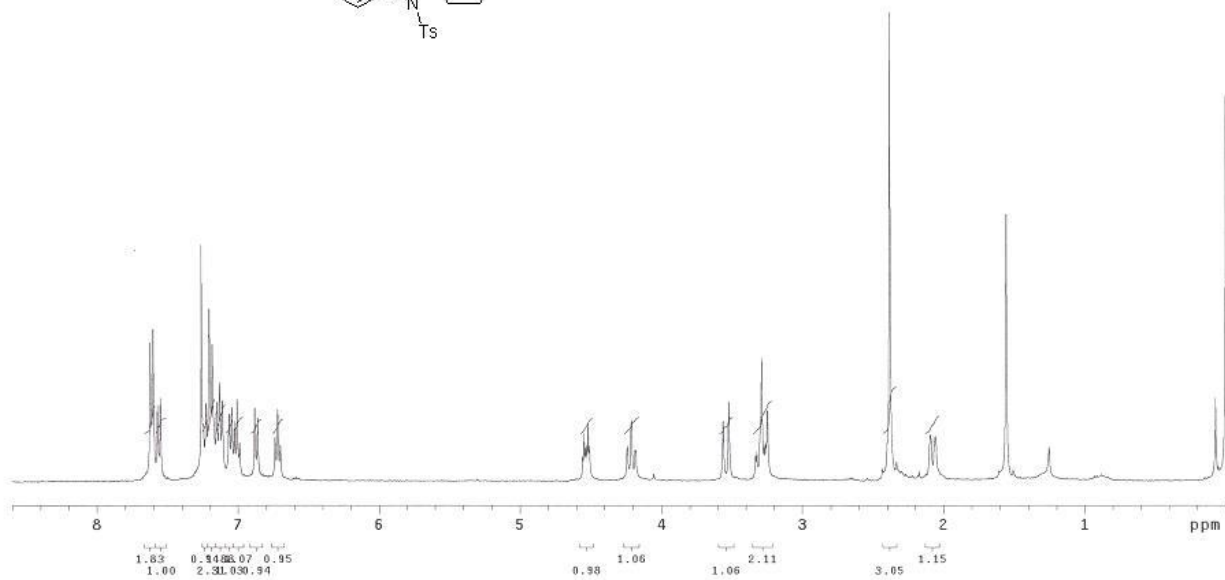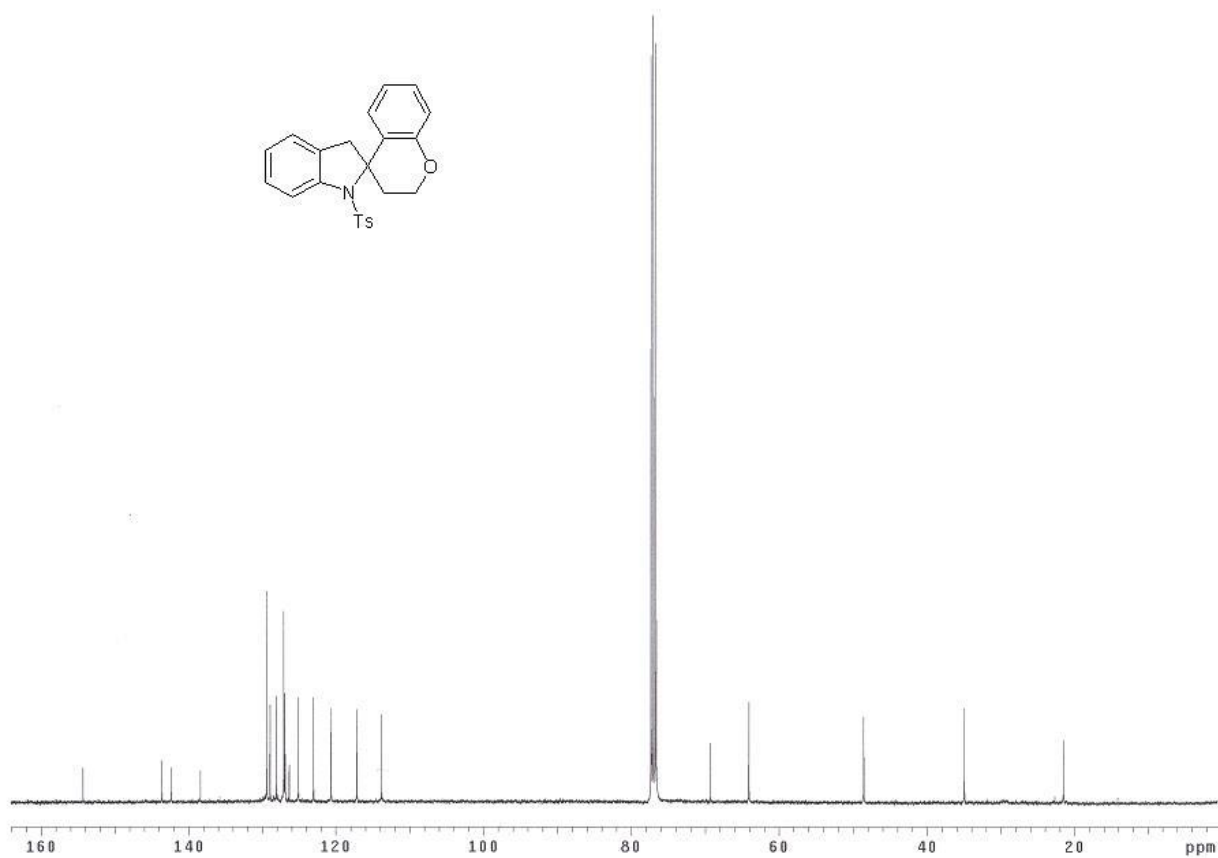

DEUTERIUM OBSERVE  
STANDARD PARAMETERS  
File: home/vnmr8/13.05-14.03/R222-2-cosy.fid  
Pulse Sequence: COSY  
Solvent: cdcl3  
Ambient temperature  
Operator: vnmr8  
File: R222-2-cosy  
Mercury-400BB "mercury"  
Relax. delay 1.301 sec  
Acq. time 0.160 sec  
Width 6398.0 Hz  
2D Width 6398.0 Hz  
2 repetitions  
128 increments  
OBSERVE H1 399.8053629 MHz  
DATA PROCESSING  
Sine bell 0.080 sec  
F1 DATA PROCESSING  
Sine bell 0.040 sec  
FT size 2048 x 2048  
Total time 7 min, 40 sec

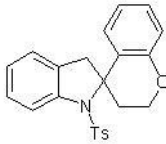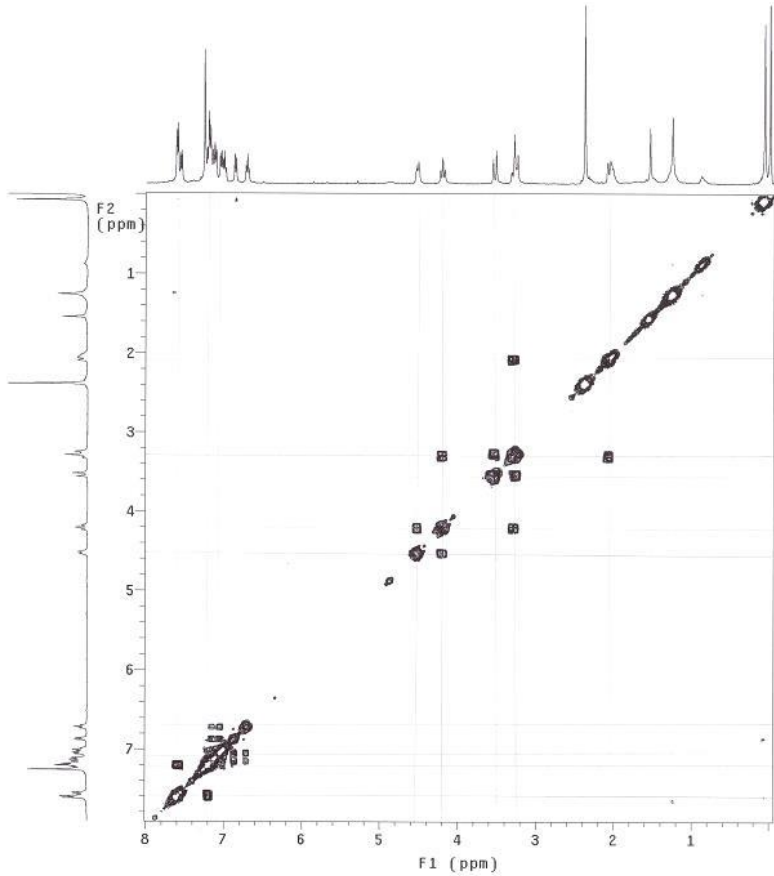

DEUTERIUM OBSERVE  
STANDARD PARAMETERS  
File: home/vnmr8/13.05-14.03/R222-2-cosy.fid  
Pulse Sequence: COSY  
Solvent: cdcl3  
Ambient temperature  
Operator: vnmr8  
File: R222-2-cosy  
Mercury-400BB "mercury"  
Relax. delay 1.301 sec  
Acq. time 0.160 sec  
Width 6398.0 Hz  
2D Width 6398.0 Hz  
2 repetitions  
128 increments  
OBSERVE H1 399.8053629 MHz  
DATA PROCESSING  
Sine bell 0.080 sec  
F1 DATA PROCESSING  
Sine bell 0.040 sec  
FT size 2048 x 2048  
Total time 7 min, 40 sec

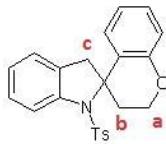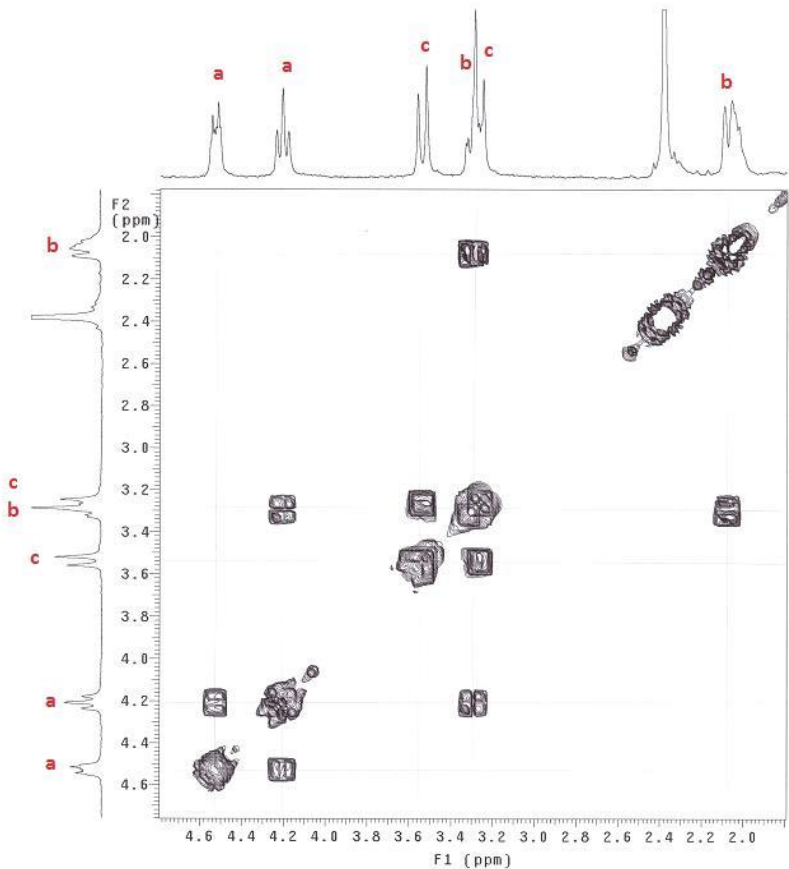

Heteronuclear polarization transfer experiment:

File: home/vnmr8/R222-2-dept.fid

Pulse Sequence: DEPT

Solvent: cdcl3

Ambient temperature

Operator: vnmr8

File: R222-2-dept

Mercury-400BB "mercury"

Relax. delay 1.500 sec  
Pulse 90.0 degrees  
Acq. time 1.000 sec  
Width 24154.6 Hz  
200 repetitions  
OBSERVE C13, 100.5311385 MHz  
DECOUPLE H1, 399.6073989 MHz  
Power 46 dB  
on during acquisition  
off during delay  
WALTZ-16 modulated  
DATA PROCESSING  
Line broadening 1.0 Hz  
FT size 65536  
Total time 25 min, 30 sec

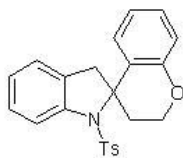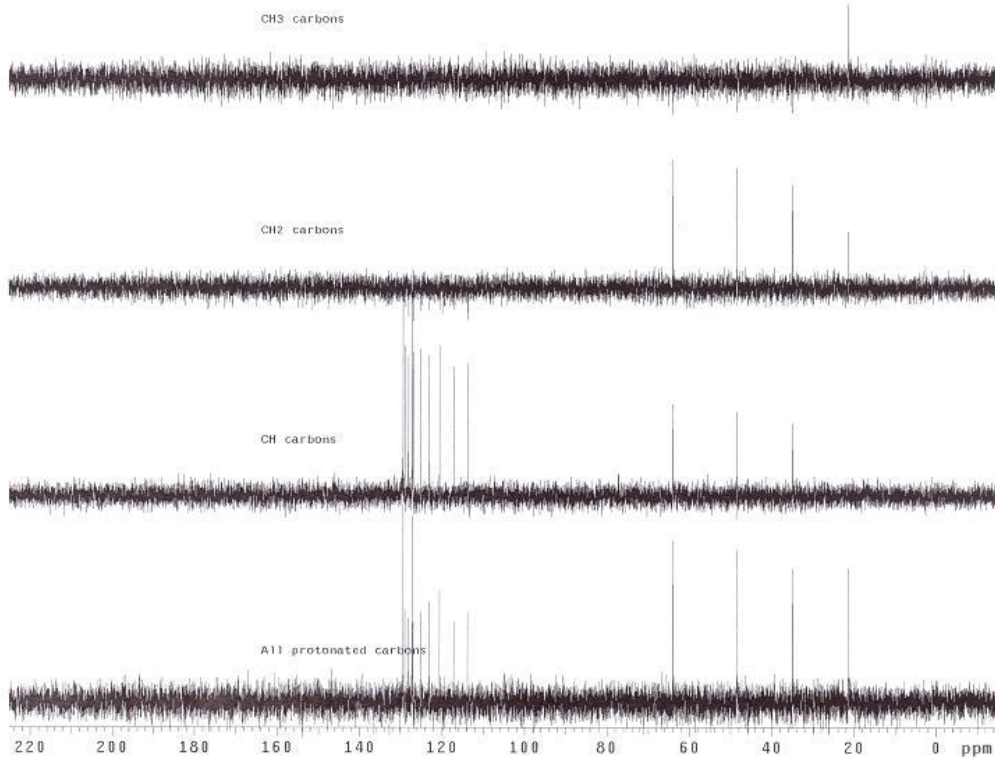

## Authentic Samples of 2-Aryl-3-aryl'-substituted Indoles (3 and 3')

### *N*-Ts-3-(4-Methoxyphenyl)-2-(4-(trifluoromethyl)phenyl)indole (3I)

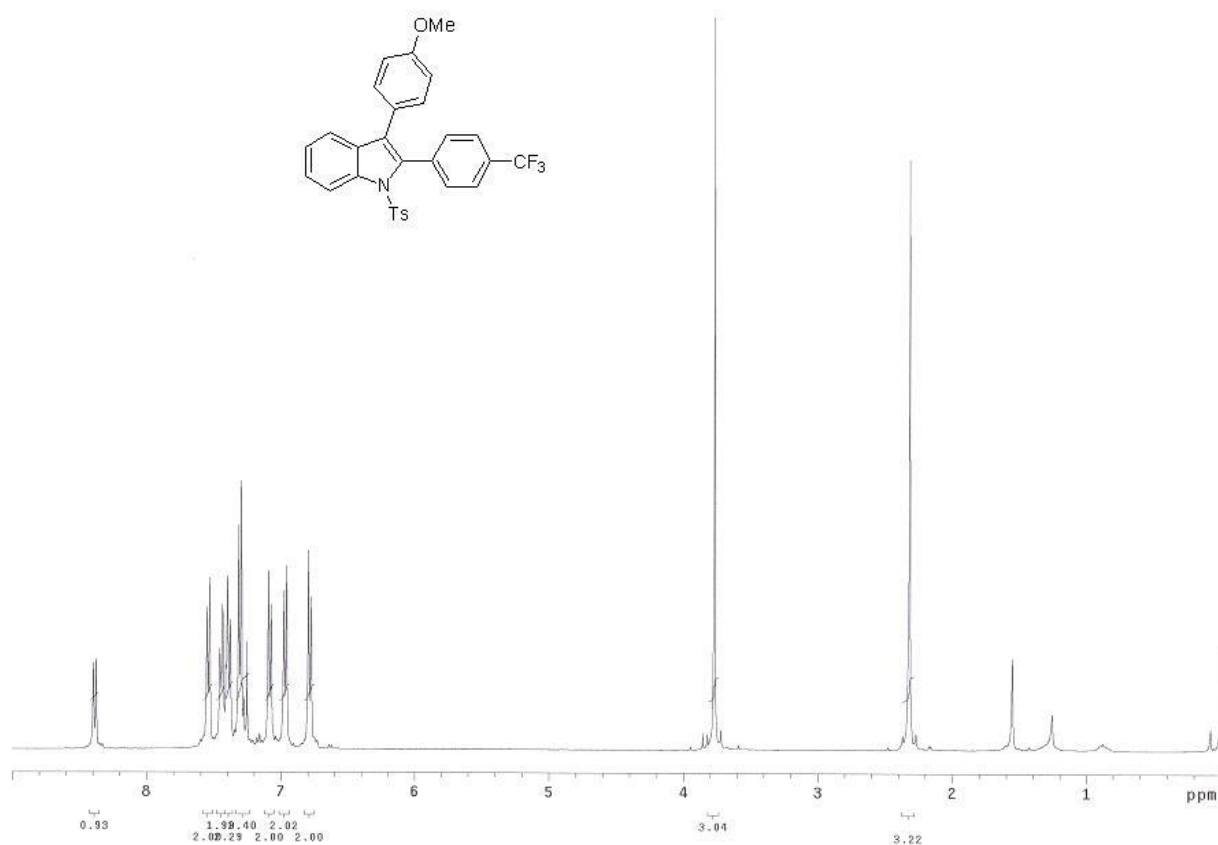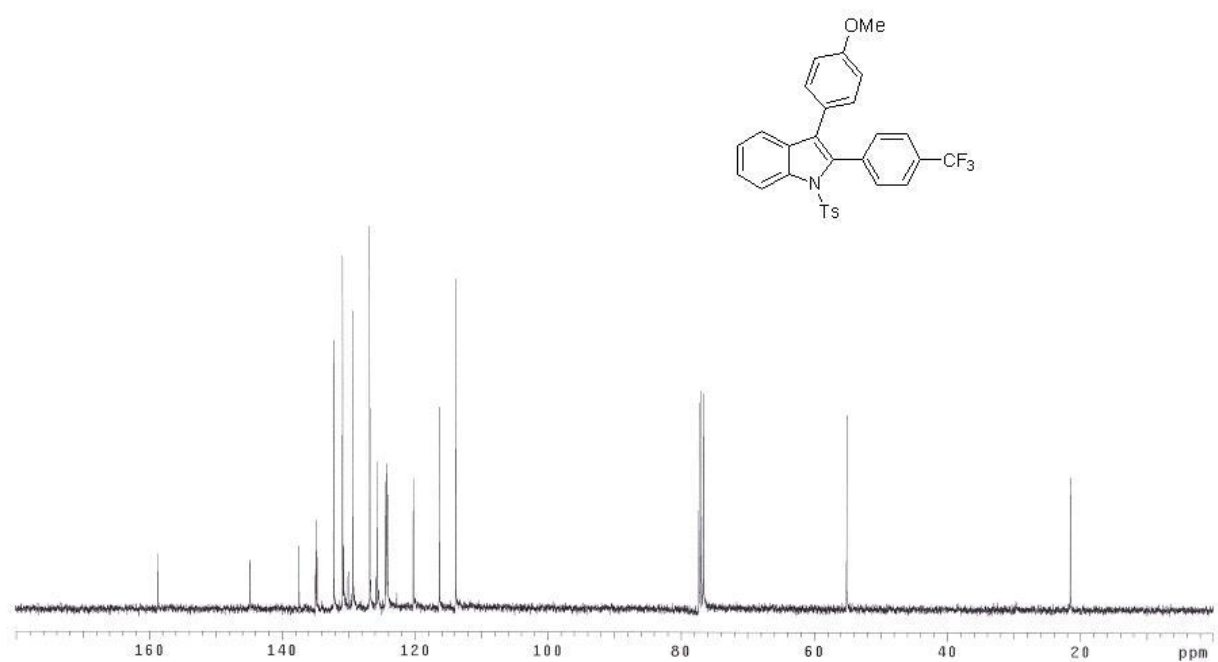



***N*-Ts-2-(4-Methoxyphenyl)-3-(4-(trifluoromethyl)phenyl)indole (31')** & ***N*-Ts-2-(4-Methoxyphenyl)indole (2b)**

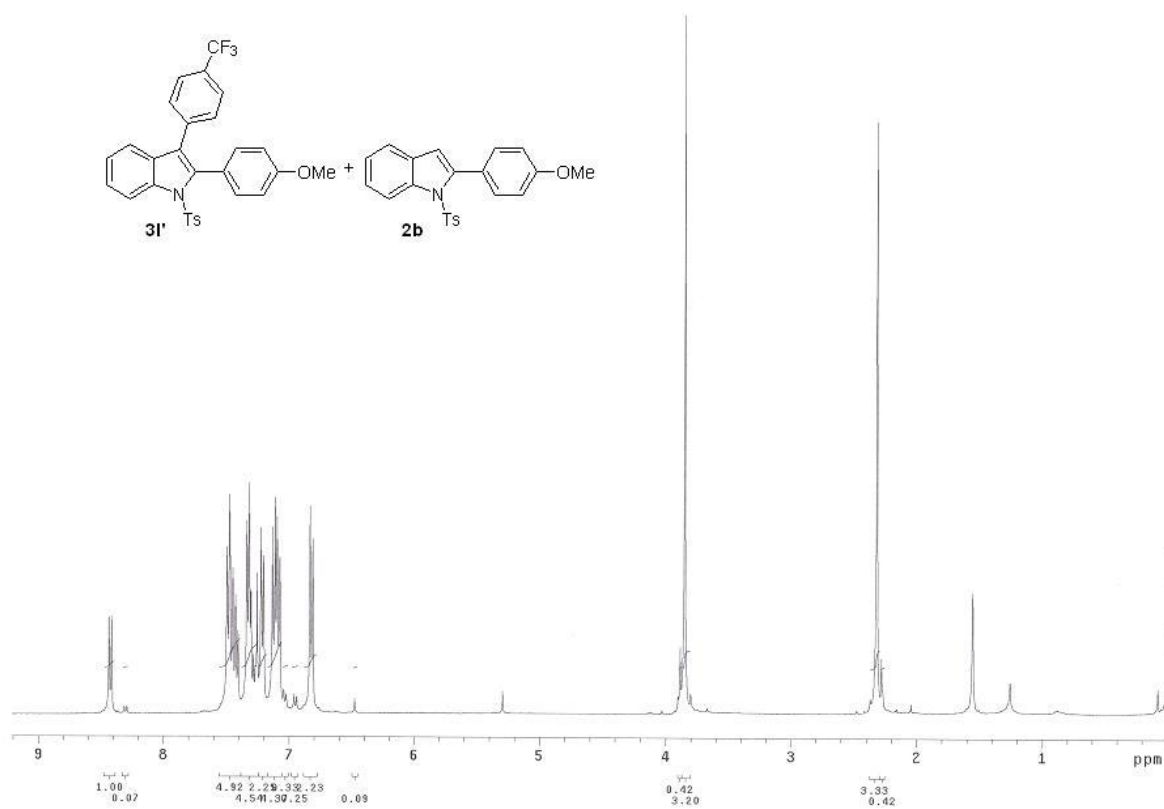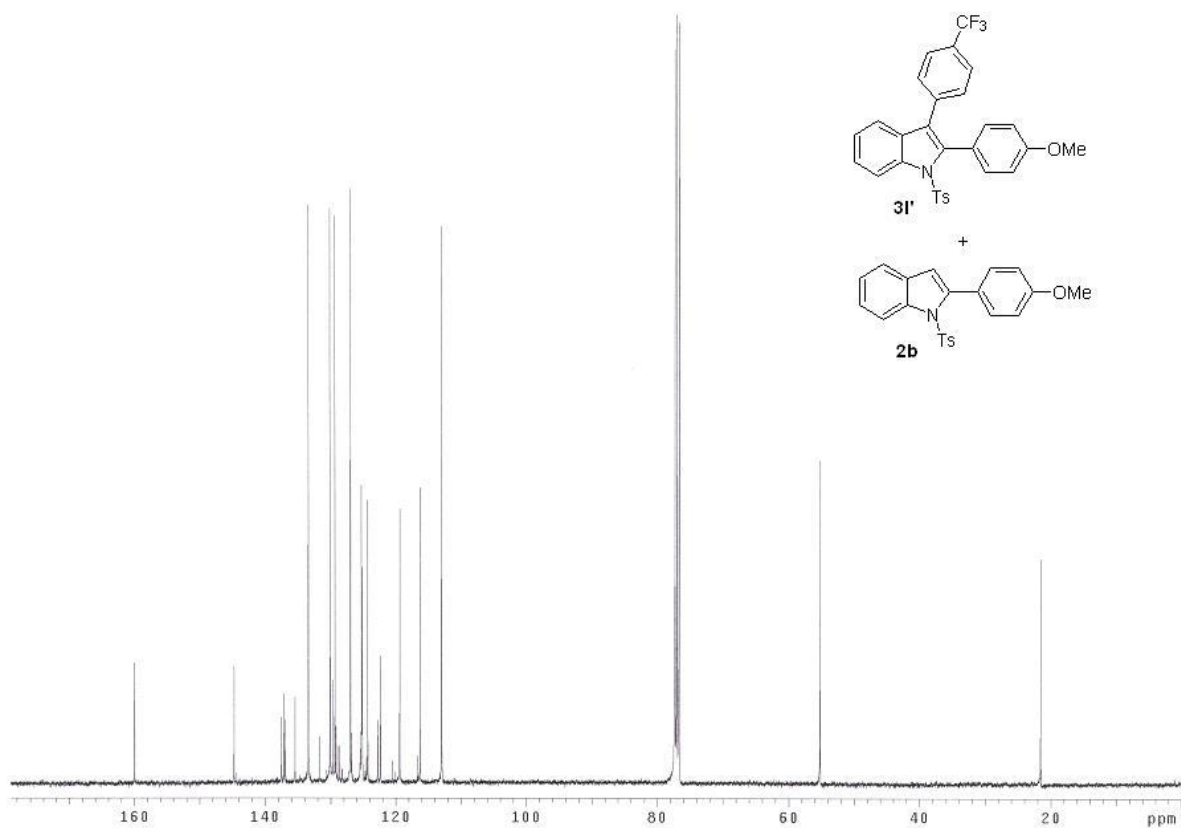

***N*-Ts-3-*p*-Tolyl-2-(4-(trifluoromethyl)phenyl)indole (3m) & *N*-Ts-2-(4-(Trifluoromethyl)phenyl)indole (2)**

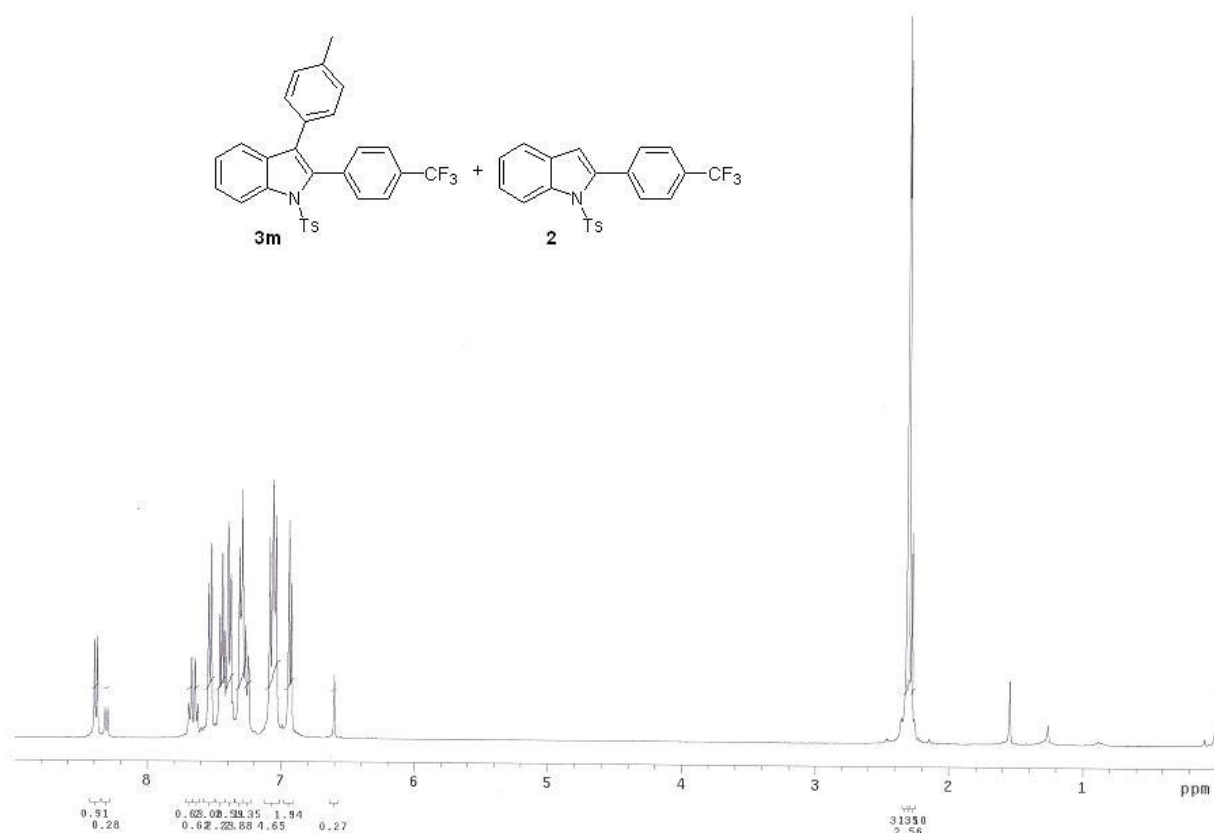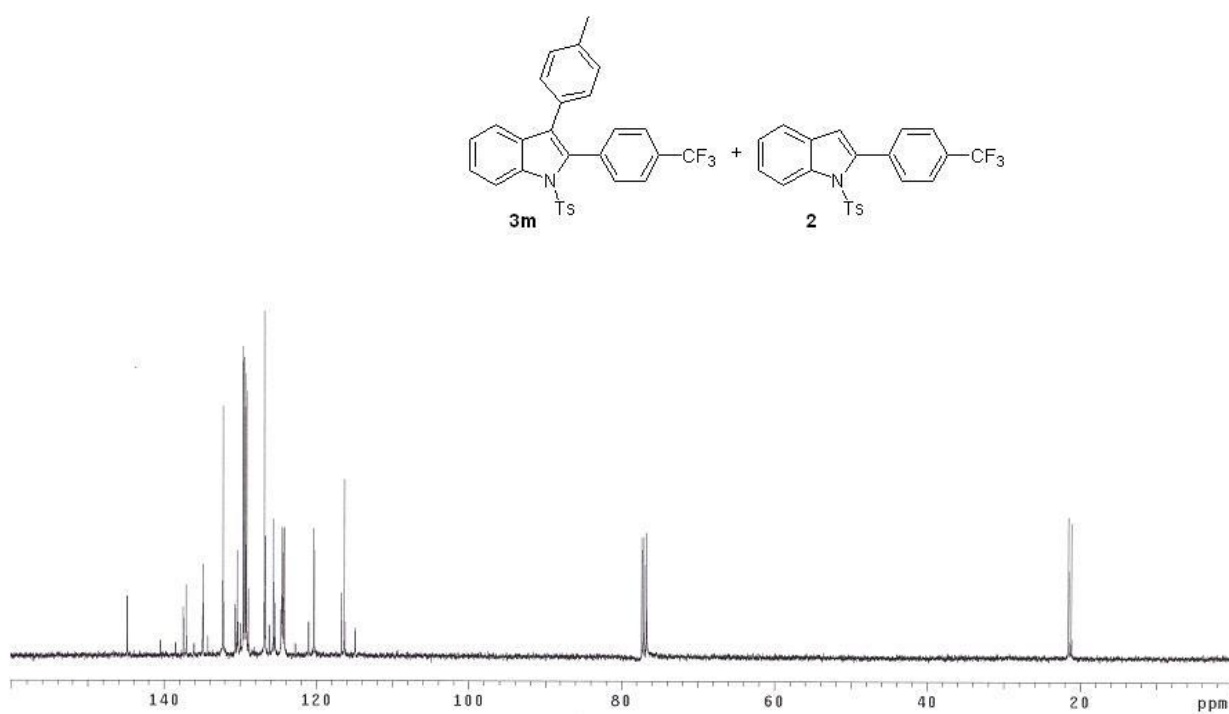

***N*-Ts-2-*p*-Tolyl-3-(4-(trifluoromethyl)phenyl)indole (3m')**

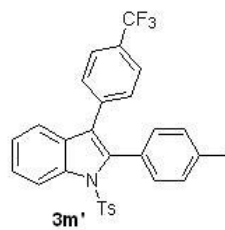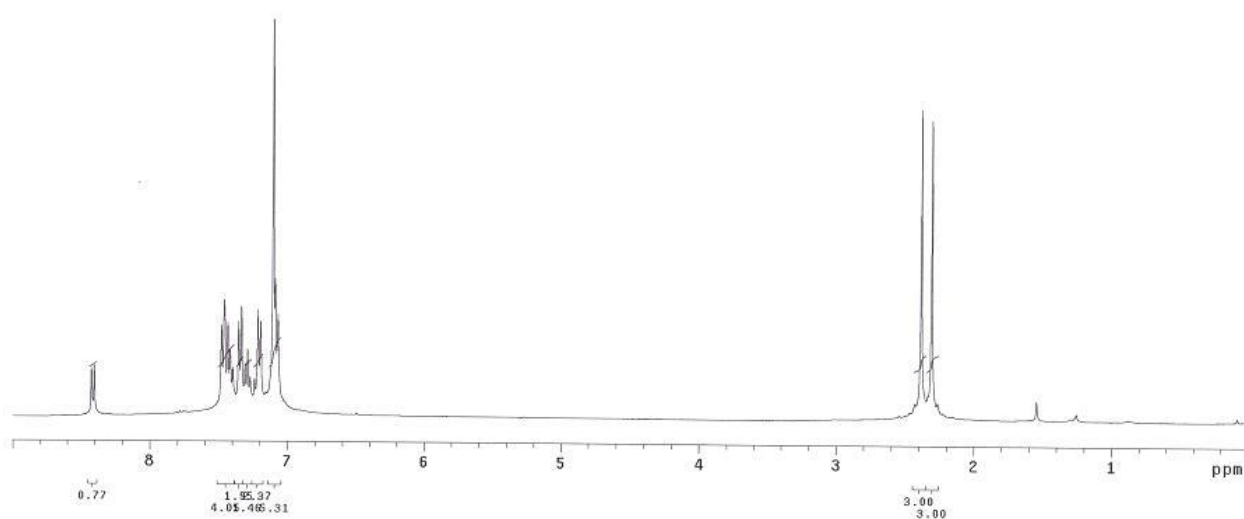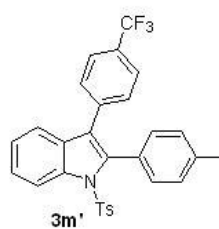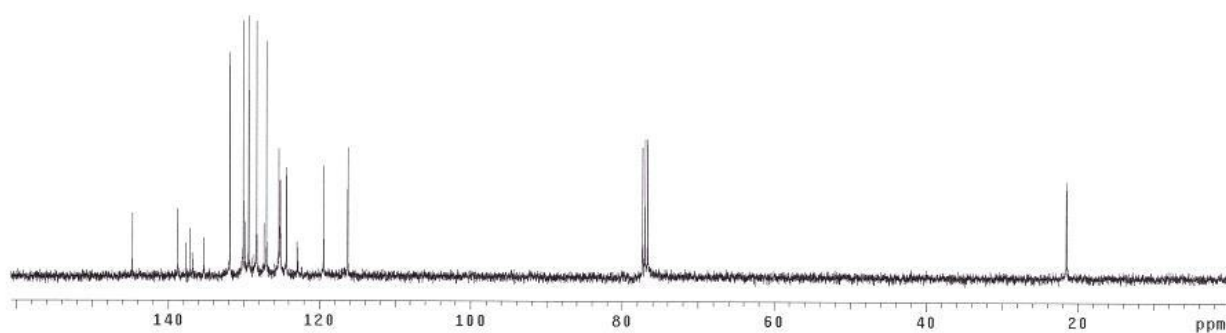

***N*-Ts-2-Phenyl-3-(4-(trifluoromethyl)phenyl)indole (3n')** & ***N*-Ts-2-Phenylindole (2a)**

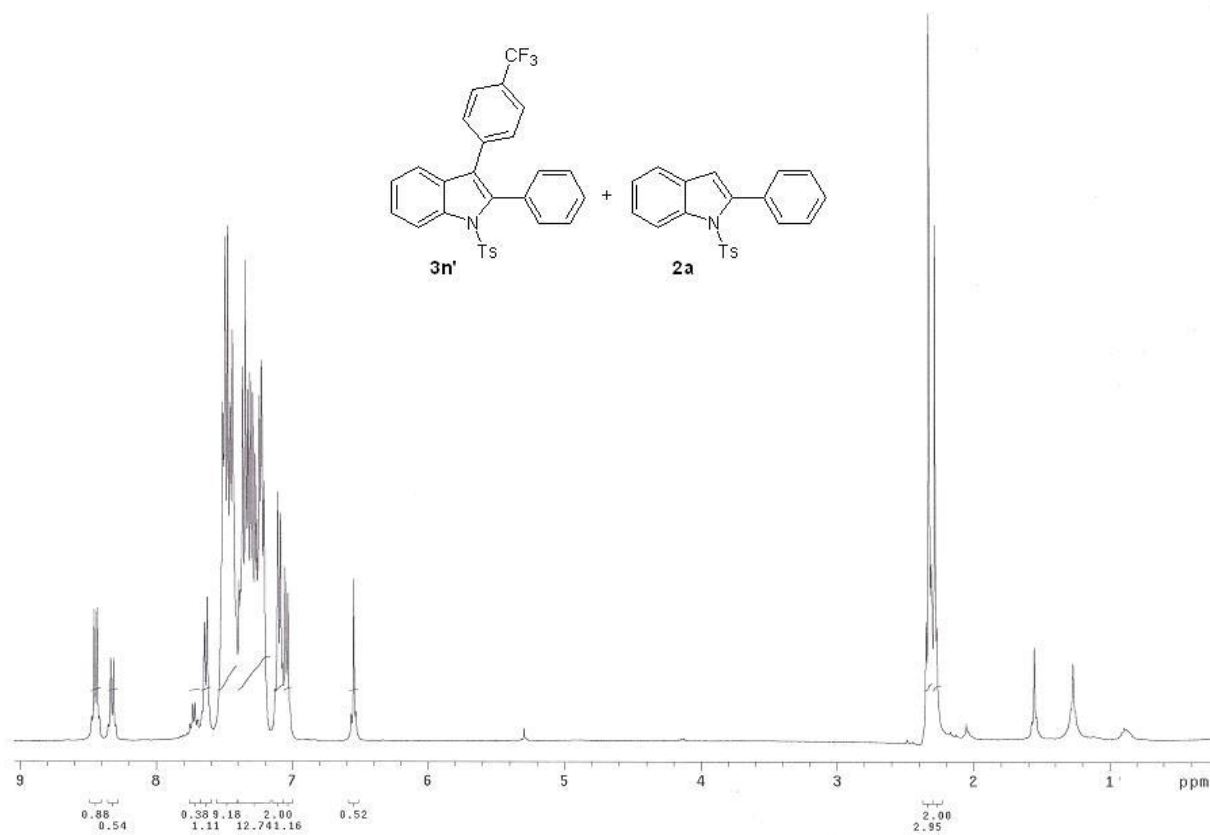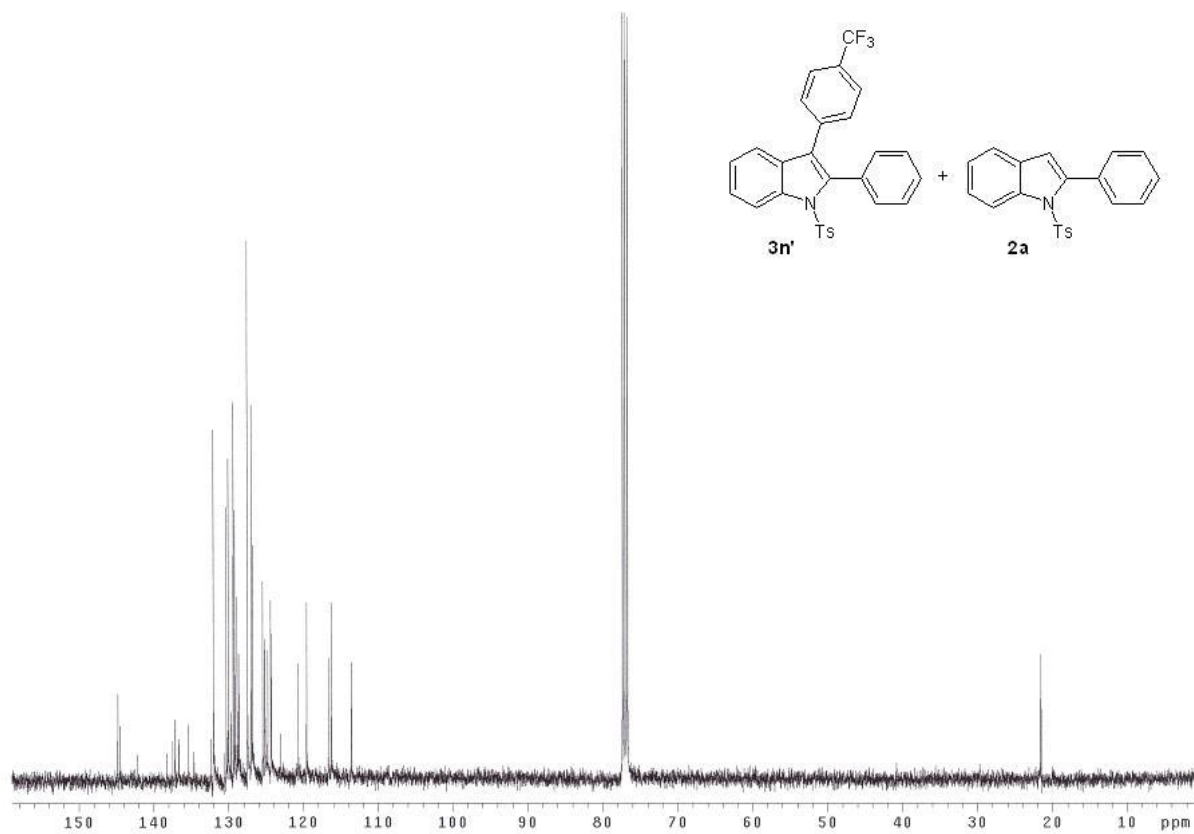

Supplement: c5ob00361j1.pdf [file c5ob00361j1.pdf]
